# Supplementary material for: MicroRNA-26b protects against MASH development in mice and can be efficiently targeted with lipid nanoparticles
Source: eLife. 2025 Apr 22;13:RP97165. doi: 10.7554/eLife.97165 (PMC12014130; doi:10.7554/eLife.97165)
Supplement: Figure 1—source data 1. [file elife-97165-fig1-data1.xlsx]

## Sheet: Figure 1B
	Apoe-/-	Apoe-/- Mir26b-/-
	0.0287744	0.0339309
	0.031901	0.028766
	0.031183	0.0367483
	0.0309019	0.0378299
	0.00818161	0.0429478
	0.0139953	0.0368769

## Sheet: Figure 1C
	Apoe-/-	Apoe-/- Mir26b-/-
	0.103605	0.106808
	0.0952014	0.16746
	0.103362	0.120038
	0.0911282	0.106441
	0.0173566	0.142441
	0.0407621	0.129788

## Sheet: Figure 1E
	Apoe-/-	Apoe-/- Mir26b-/-
	1.08938	1.53247
	0.924839	1.82755
	0.898152	1.06437
	1.15286	1.11121
	0.934765	1.31381
	1.02927	1.31274
	0.970734

## Sheet: Figure 1F
				Microvesicular			Macrovesicular
	Steatosis			Steatosis			Steatosis
	Apoe-/-	Apoe-/- Mir26b-/-		Apoe-/-	Apoe-/- Mir26b-/-		Apoe-/-	Apoe-/- Mir26b-/-
	3	3		2	3		1	2
	3	2		2	3		1	1
	2	4		3	3		1	3
	4	4		3	3		1	3
	4	4		3	2		1	3
	0.5	4		1	3		0.5	3
	0.5			1			0.5

## Sheet: Figure 1G
	Apoe-/-	Apoe-/- Mir26b-/-
	1.05217	1.61001
	1.24615	1.44986
	0.576059	0.339655
	1.12562	0.48482
	0.932218	1.8861
	1.06778	0.747053

## Sheet: Figure 1H
	Apoe-/-	Apoe-/- Mir26b-/-
	0.897702	1.47756
	0.969464	1.37784
	1.56146	0.589114
	0.571371	1.86587
	0.848141	0.733948
	1.15186	0.651901

## Sheet: Figure 1I
	Apoe-/-	Apoe-/- Mir26b-/-
	0.88369	4.26427
	0.782171	10.1331
	0.611249	0.752678
	1.70271	1.44305
	1.02018	1.56937
	1.05417	1.72482
	0.945828

## Sheet: Figure 1J
	Apoe-/-	Apoe-/- Mir26b-/-
	0.685956	2.59647
	1.02452	1.88174
	0.760157	1.28673
	1.60277	1.76298
	0.926598	1.80573
	0.524921	2.30007
	1.47508

## Sheet: Figure 1K
	Apoe-/-	Apoe-/- Mir26b-/-
	81.3477	103.957
	73.2078	100.001
	83.8174	90.3819
	88.3454	94.6558

## Sheet: Figure 1L
	Apoe-/-	Apoe-/- Mir26b-/-
	83.9948	90.185
	79.4724	111.292
	79.8241	97.3597
	80.4986	106.53
