# Supplementary material for: MicroRNA-26b protects against MASH development in mice and can be efficiently targeted with lipid nanoparticles
Source: eLife. 2025 Apr 22;13:RP97165. doi: 10.7554/eLife.97165 (PMC12014130; doi:10.7554/eLife.97165)
Supplement: Figure 2—source data 1. [file elife-97165-fig2-data1.xlsx]

## Sheet: Figure 2B
	Apoe-/- Mir26bfl/fl	Apoe-/- LysMCre+ Mir26bfl/fl
	0.00551018	0.0486417
	0.0317667	0.103712
	0.06247	0.122549
	0.034079	0.230681
	0.0432028	0.196042
	0.0490771	0.199436
	0.0623999
	0.0477692

## Sheet: Figure 2C
	Apoe-/- Mir26bfl/fl	Apoe-/- LysMCre+ Mir26bfl/fl
	0.357102	0.290422
	0.26856	0.320014
	0.331069	0.349895
	0.337937	0.443356
	0.332258	0.342673
	0.347382	0.338093
	0.197625
	0.40366

## Sheet: Figure 2E
	Apoe-/- Mir26bfl/fl	Apoe-/- LysMCre+ Mir26bfl/fl
	0.749195	1.91317
	1.27362	1.18119
	0.999902	1.1251
	1.12508	1.32691
	0.852196	1.64636
		1.13139

## Sheet: Figure 2F
	Apoe-/- Mir26bfl/fl	Apoe-/- LysMCre+ Mir26bfl/fl
	0.787071	1.37459
	1.39013	2.38824
	0.717716	1.06596
	1.02953	1.6082
	1.07257	1.67547
	0.959432	1.47528
	0.83767
	1.20588

## Sheet: Figure 2G
	Apoe-/- Mir26bfl/fl	Apoe-/- LysMCre+ Mir26bfl/fl
	0.638448	1.41735
	1.34366	1.9483
	0.998661	0.975276
	0.873605	1.74796
	1.0639	1.06906
	0.933204	0.935674
	1.09363
	1.0549
