# Supplementary material for: MicroRNA-26b protects against MASH development in mice and can be efficiently targeted with lipid nanoparticles
Source: eLife. 2025 Apr 22;13:RP97165. doi: 10.7554/eLife.97165 (PMC12014130; doi:10.7554/eLife.97165)
Supplement: Figure 3—source data 1. [file elife-97165-fig3-data1.xlsx]

## Sheet: Figure 3A
	Apoe-/-	Apoe-/- Mir26b-/-
	151.039	158.253
	152.269	157.515
	116.462	167.707
	148.773	171.57
	86.4844
	125.87

## Sheet: Figure 3B
	Apoe-/-	Apoe-/- Mir26b-/-
	6884.3	25222.2
	13859.9	22947.8
	2828.47	20205.4
	9326.44	11501.5
	11315.2	14460
	12238.5

## Sheet: Figure 3C
	Apoe-/-	Apoe-/- Mir26b-/-
	50.0724	40.9749
	34.3565	37.4131
	37.9923	58.6557
	53.4398	31.6781
	37.7282	80.2009
	39.3064

## Sheet: Figure 3D
	Apoe-/-	Apoe-/- Mir26b-/-
	62.2181	61.1937
	55.6749	70.6115
	33.4148	69.874
	38.5452	27.4829
	43.2288	58.3296
	51.0263

## Sheet: Figure 3E
	Apoe-/-	Apoe-/- Mir26b-/-
	7.49507	7.8238
	9.79619	7.29783
	5.19395	6.77186
	5.91716	6.37738
	6.57462	8.02104
	4.93097	12.1631
	6.77186	8.21828
	9.86193	11.7028
	9.00723	10.3222
	7.95529	10.5194
	5.65418	9.00723
	5.71992	10.0592
	5.52268
	7.62656

## Sheet: Figure 3F
	Apoe-/-	Apoe-/- Mir26b-/-
	8.48126	5.78567
	6.77186	5.85141
	7.75805	8.02104
	9.13873	4.66798
	5.58843	9.46746
	6.77186	7.95529
	7.23208	9.07298
	4.60224	5.52268
	6.57462	7.95529
	12.7548	7.10059
	5.65418	6.57462
	4.86522	7.23208
	6.1144
	5.78567

## Sheet: Figure 3G
	Apoe-/-	Apoe-/- Mir26b-/-
	21.9364	20.5663
	24.7315	19.6866
	14.3162	17.7989
	18.9392	25.7886
	24.3376	31.0644
	28.384	26.8796
	19.3991	26.6248
	31.4474	23.2091
	26.9927	29.9561
	25.1509	21.9538
	23.8647	23.1122
	24.4022	24.1116
	24.2582
	18.9794

## Sheet: Figure 3H
	Apoe-/-	Apoe-/- Mir26b-/-
	6.9691	2.62985
	7.36358	4.99671
	1.90664	7.62656
	3.15582	5.91716
	3.22157	3.61604
	4.47074	3.4188
	1.57791	9.33596
	2.43261	3.5503
	2.10388	1.57791
	2.36686	3.02433
	3.48455	5.39119
	3.74754	8.08679
