# Supplementary material for: MicroRNA-26b protects against MASH development in mice and can be efficiently targeted with lipid nanoparticles
Source: eLife. 2025 Apr 22;13:RP97165. doi: 10.7554/eLife.97165 (PMC12014130; doi:10.7554/eLife.97165)
Supplement: Figure 4—source data 1. [file elife-97165-fig4-data1.xlsx]

## Sheet: Figure 4B
	Apoe-/-	Apoe-/- Mir26b-/-
	1.26482	0.881561
	1.08098	1.30647
	0.768184	1.52556
	0.886013	1.27719
	1.15057	1.37796
	0.849433	1.43872

## Sheet: Figure 4C
	Apoe-/-	Apoe-/- Mir26b-/-
	0.853783	3.05648
	0.673942	2.35219
	1.41162	1.1298
	1.06066	1.54839
	1.18395	1.3394
	0.816052

## Sheet: Figure 4D
	Apoe-/-	Apoe-/- Mir26b-/-
	0.825408	1.21764
	1.36854	2.37097
	0.843256	0.64125
	1.15303	1.12005
	0.809762	1.25876
	0.516247	4.23978
	1.48375

## Sheet: Figure 4E
	Apoe-/-	Apoe-/- Mir26b-/-
	1.05861	2.52916
	0.526873	2.68476
	0.725619	1.17591
	1.4871	1.1871
	1.20181	1.59813
	0.435696	2.20652
	1.5643
