# Supplementary material for: MicroRNA-26b protects against MASH development in mice and can be efficiently targeted with lipid nanoparticles
Source: eLife. 2025 Apr 22;13:RP97165. doi: 10.7554/eLife.97165 (PMC12014130; doi:10.7554/eLife.97165)
Supplement: Figure 5—source data 1. [file elife-97165-fig5-data1.xlsx]

## Sheet: Figure 5A
BioNavigator Version	6.3.67.0	QCLog_CmbCor	STK Basis Processing TemplateDate		PamGrid Version	Protocol file name	Mon, 23 Oct 2023 16:08:26 GMT
Sample name	V682	V686	V684	V685	V695	V700	V697	V699
2_Treatment	A_WT	A_WT	A_WT	A_WT	B_KO	B_KO	B_KO	B_KO
Name in PCA	WT-1	WT-2	WT-3	WT-4	KO-1	KO-2	KO-3	KO-4
	5.70091	5.58449	5.78851	5.85583	5.88266	6.03704	5.93658	5.88618
	5.32538	5.34436	5.40432	5.36971	5.40634	5.50176	5.46394	5.34689
	5.28776	4.97676	5.56941	5.52314	5.56428	5.72193	5.77136	6.79233
	11.7479	11.8861	11.6969	11.5473	12.044	12.07	12.0553	12.0094
	8.8386	8.98399	9.03422	8.88545	9.48267	9.57609	9.58582	9.50826
	6.64084	6.84675	6.9318	6.59138	7.40927	7.11882	7.39092	7.29295
	10.5141	10.853	10.6504	10.5676	11.0875	10.9905	11.1648	11.1782
	8.03558	8.76043	8.61484	8.30721	9.0042	8.60898	9.27708	9.44428
	4.95379	5.0807	5.3858	4.95626	5.37706	5.2526	5.30118	5.22758
	6.06689	6.05813	6.20677	6.14827	6.16563	6.25045	6.20309	6.18574
	4.43825	4.289	4.24235	4.59055	4.50135	4.88038	4.84929	4.51621
	4.85377	4.89933	5.12538	5.0585	5.15127	5.24205	5.21321	4.98926
	11.8741	11.9832	11.9046	11.738	12.1448	12.1916	12.1481	12.104
	4.46759	4.23965	5.01642	5.24284	5.04169	4.07936	5.0935	4.6697
	11.5083	11.6357	11.6099	11.539	11.7257	11.6728	11.7952	11.8209
	6.10141	5.99213	6.30084	6.14967	6.58939	6.68759	6.76451	6.73887
	11.5064	11.7958	11.5982	11.5217	11.9367	11.8241	11.9809	12.0488
	13.1264	13.2625	13.2254	13.1639	13.3606	13.4072	13.2716	13.4295
	9.48444	9.3332	9.24027	9.0397	9.48794	9.57749	9.4718	9.37599
	11.5961	11.9574	11.8228	11.7294	12.0457	11.9724	12.0694	12.0545
	11.1226	11.3215	11.3458	11.1342	11.6241	11.5423	11.6731	11.662
	8.3561	8.84478	8.66526	8.55196	9.12307	9.07457	9.35134	9.21421
	10.0949	10.3742	10.3312	10.2242	10.5509	10.4842	10.5755	10.5958
	11.6621	11.8895	11.7797	11.6243	12.0791	12.0884	12.139	12.0695
	8.61451	8.51768	8.80491	8.52618	9.01388	9.12493	9.09152	8.9911
	8.88733	8.87581	9.05925	9.02444	9.28746	9.33047	9.35915	9.36078
	12.7314	12.8853	12.8533	12.782	13.0364	13.0909	13.0248	13.0956
	6.08371	5.95719	6.08081	6.16665	6.14783	6.18484	6.25039	6.06853
	7.15831	7.67875	7.59143	7.37164	7.97936	7.54433	8.25416	8.1102
	12.2604	12.3382	12.2888	12.2299	12.4769	12.5367	12.5469	12.5137
	6.56297	6.96365	7.02294	6.76937	7.40523	7.00384	7.64511	7.44326
	9.81632	10.2068	10.0072	9.84524	10.4612	10.1244	10.5453	10.5931
	12.0297	12.1874	11.9833	11.94	12.2533	12.2531	12.2322	12.279
	7.59243	7.52811	7.81212	7.67833	7.76778	7.76766	7.90238	7.68308
	5.89124	5.91747	5.9832	5.8228	6.49041	6.52844	6.62641	6.30261
	4.41978	4.05494	4.07105	4.79325	4.28313	4.35906	4.79389	4.48277
	11.3641	11.4619	11.3079	11.2736	11.6596	11.6727	11.6563	11.6515
	12.3819	12.4291	12.3862	12.2524	12.5453	12.6058	12.53	12.5117
	4.51954	4.35595	4.62761	4.38692	4.59341	4.74153	4.62293	4.44116
	7.31777	7.68283	7.60952	7.49575	8.08985	7.89375	8.19972	8.10655
	7.57709	7.82978	7.87236	7.6578	8.21557	8.00509	8.3134	8.34872
	6.26304	6.61299	6.63586	6.40214	7.1056	6.67534	7.29532	7.30816
	12.3709	12.4457	12.4308	12.3465	12.5881	12.6463	12.5939	12.5853
	8.72827	8.69818	9.01541	8.74224	9.12514	9.13822	9.22356	9.10843
	11.1719	11.4077	11.257	11.1585	11.5982	11.5783	11.7084	11.6814
	5.98349	6.03567	6.2135	5.97532	6.34921	6.40758	6.48988	6.18866
	4.97787	4.72296	4.80662	4.87572	4.88534	5.13866	5.13827	5.12443
	9.42113	9.88137	9.61255	9.61536	10.0395	9.83869	10.2035	10.1898
	4.59612	4.351	4.29775	4.77769	4.47021	4.24894	4.65722	4.48843
	5.33683	5.28116	5.39317	5.41073	5.35226	5.24047	5.39147	5.11627
	4.65597	4.25733	4.67264	4.56386	4.66877	4.74269	4.63848	4.71141
	5.42773	5.35312	5.42509	5.37681	5.45289	5.39924	5.30238	5.19556
	12.1348	12.3536	12.2506	12.2216	12.5404	12.4627	12.5562	12.6039
	10.7809	11.0691	10.9566	10.9126	11.2325	11.1345	11.2714	11.2989
	11.3008	11.6026	11.4686	11.4067	11.8037	11.7294	11.8155	11.8275
	4.66906	4.59203	4.69288	4.53512	4.58591	4.80352	4.49205	4.63563
	5.05217	4.95371	5.19538	5.01158	5.16869	5.41398	4.75892	5.35145
	10.4738	10.7823	10.6592	10.5232	11.0101	10.9791	11.0752	11.0235
	10.4618	10.5221	10.66	10.4551	11.0361	11.0389	11.121	11.0019
	9.54114	9.79663	9.80446	9.50633	10.1572	10.0271	10.1721	10.0414
	8.30436	8.3778	8.63615	8.34147	8.76899	8.82475	8.78436	8.70505
	8.86696	9.46588	9.5141	9.1965	9.91156	9.69358	10.0597	10.0262
	7.57399	7.64532	7.78756	7.69673	7.99984	8.00909	8.11694	8.05078
	10.9833	11.1075	11.1809	11.0902	11.4608	11.4549	11.5066	11.5747
	11.5608	11.6971	11.6127	11.5067	11.8321	11.9565	11.8656	11.8693
	6.55164	6.67745	6.71716	6.49928	7.14762	7.44082	7.20148	6.98596
	6.96072	6.91643	7.29364	7.06683	7.29572	7.40685	7.24547	7.17417
	4.5985	4.44549	4.43161	4.42425	4.57483	4.26761	4.60206	4.37395
	5.08314	5.08035	5.22665	5.06003	5.22937	5.13301	5.16117	4.92691
	9.51233	9.87858	9.79845	9.60644	10.1969	10.0064	10.2321	10.3244
	10.846	11.0639	10.8453	10.7806	11.1708	11.1781	11.1814	11.2063
	9.33975	9.59342	9.45817	9.46043	9.77465	9.84025	9.86817	9.96574
	9.87767	10.1694	9.93985	9.78526	10.3222	10.2666	10.3519	10.3351
	12.0608	12.105	12.0791	11.9701	12.2987	12.405	12.2793	12.2872
	8.64917	8.84359	9.05311	8.83353	9.43399	9.28796	9.55802	9.50713
	12.4773	12.5751	12.5034	12.4151	12.7109	12.7109	12.6505	12.714
	12.0056	12.3252	12.0163	11.938	12.3699	12.274	12.3149	12.4398
	11.3924	11.5142	11.6371	11.4568	11.8925	11.9653	11.9304	12.0003
	8.37536	8.65723	8.67563	8.51128	8.85438	8.73913	8.92452	8.90092
	11.1199	11.3974	11.2563	11.162	11.5108	11.4663	11.5177	11.5411

## Sheet: Figure 5B
ID	UniprotAccession	Sequence	2G_KO vs. WT::TTest_delta_B_KO	2G_KO vs. WT::TTest_p_B_KO
ANDR_785_797	P10275	VRMRHLSQEFGWL	0.602644	2.31637e-05
NMDZ1_890_902	Q05586	SFKRRRSSKDTST	0.52475	6.71472e-05
GBRB2_427_439	P47870	SRLRRRASQLKIT	0.239224	0.000134569
PTK6_436_448	Q13882	ALRERLSSFTSYE	0.408752	0.00016645
VASP_150_162	P50552	EHIERRVSNAGGP	0.447008	0.000225017
H2B1B_ 27_40	P33778	GKKRKRSRKESYSI	0.583291	0.000246513
CENPA_1_14	P49450	MGPRRRSRKPEAPR	0.559074	0.000297055
ESR1_160_172	P03372	GGRERLASTNDKG	0.372758	0.000297239
KAP2_92_104	P13861	SRFNRRVSVCAET	0.30817	0.000302046
KCNA6_504_516	P17658	ANRERRPSYLPTP	0.204923	0.000316724
PPR1A_28_40	Q13522	QIRRRRPTPATLV	0.368261	0.00040789
STK6_283_295	O14965	SSRRTTLCGTLDY	0.263794	0.000714897
F263_454_466	Q16875	NPLMRRNSVTPLA	0.248919	0.00071832
RYR1_4317_4329	P21817	VRRLRRLTAREAA	0.399258	0.00087187
KPB1_1011_1023	P46020	QVEFRRLSISAES	0.392747	0.000959773
ERBB2_679_691	P04626	QQKIRKYTMRRLL	0.439542	0.00100515
STMN2_90_102	Q93045	AAGERRKSQEAQV	0.601928	0.00101604
CSF1R_701_713	P07333	NIHLEKKYVRRDS	0.394365	0.00102329
PTN12_32_44	Q05209	FMRLRRLSTKYRT	0.286543	0.00104054
EPB42_241_253	P16452	LLNKRRGSVPILR	0.355077	0.00123673
NFKB1_330_342	P19838	FVQLRRKSDLETS	0.412334	0.00127148
MYPC3_268_280	Q14896	LSAFRRTSLAGGG	0.300633	0.00139605
TOP2A_1463_1475	P11388	RRKRKPSTSDDSD	0.203863	0.00139902
RAP1B_172_184	P61224	PGKARKKSSCQLL	0.58259	0.00161641
KCNA1_438_450	Q09470	DSDLSRRSSSTMS	0.545999	0.00176084
ANXA1_209_221	P04083	AGERRKGTDVNVF	0.5503	0.00194412
NCF1_321_333	P14598	QDAYRRNSVRFLQ	0.349346	0.00195327
CAC1C_1974_1986	Q13936	ASLGRRASFHLEC	0.272128	0.00239401
NOS3_1171_1183	P29474	SRIRTQSFSLQER	0.437297	0.00263411
DESP_2842_2854	P15924	RSGSRRGSFDATG	0.586274	0.00265343
RS6_228_240	P62753	IAKRRRLSSLRAS	0.300184	0.00296585
KCNA2_442_454	P16389	PDLKKSRSASTIS	0.486436	0.00343437
ADRB2_338_350	P07550	ELLCLRRSSLKAY	0.325128	0.00380737
REL_260_272	Q04864	KMQLRRPSDQEVS	0.490993	0.00385223
KIF2C_105_118_S106G	Q99661	EGLRSRSTRMSTVS	0.35281	0.00401314
PLEK_106_118	P08567	GQKFARKSTRRSI	0.355844	0.00414661
SCN7A_898_910	Q01118	KNGCRRGSSLGQI	0.375919	0.00419553
E1A_ADE05_212_224	P03255	AILRRPTSPVSRE	0.295468	0.00447736
NCF1_296_308	P14598	RGAPPRRSSIRNA	0.304494	0.00468658
VTNC_390_402	P04004	NQNSRRPSRATWL	0.275078	0.0049091
KAP3_107_119	P31323	NRFTRRASVCAEA	0.185797	0.00513032
CFTR_730_742	P13569	EPLERRLSLVPDS	0.342092	0.00571968
CDN1A_139_151	P38936	GRKRRQTSMTDFY	0.180425	0.00697209
GRIK2_708_720	Q13002	FMSSRRQSVLVKS	0.219283	0.00712022
PLM_76_88	O00168	EEGTFRSSIRRLS	0.661885	0.00808385
CFTR_761_773	P13569	LQARRRQSVLNLM	0.172672	0.00981903
VASP_271_283	P50552	LARRRKATQVGEK	0.299863	0.0102959
KPCB_19_31_A25S	P05771	RFARKGSLRQKNV	0.306839	0.0109047
KCNA3_461_473	P22001	EELRKARSNSTLS	0.617598	0.0116265
LIPS_944_956	Q05469	GFHPRRSSQGATQ	0.435271	0.0140724
GPSM2_394_406	P81274	PKLGRRHSMENME	0.46212	0.0157753
CREB1_126_138	P16220	EILSRRPSYRKIL	0.259084	0.0169782
GPR6_349_361	P46095	QSKVPFRSRSPSE	0.544623	0.0184668
TY3H_65_77	P07101	FIGRRQSLIEDAR	0.278373	0.0247879
ACM5_494_506	P08912	CYALCNRTFRKTF	0.203184	0.0254945
KS6A1_374_386	Q15418	QLFRGFSFVATGL	0.225885	0.0336111
FRAP_2443_2455	P42345	RTRTDSYSAGQSV	0.521976	0.0351097
BAD_112_124	Q92934	RELRRMSDEFVDS	0.654125	0.0363723
BCKD_45_57	O14874	ERSKTVTSFYNQS	0.29677	0.0621301
RBL2_655_667	Q08999	GLGRSITSPTTLY	0.221152	0.0636087
BAD_93_105	Q92934	FRGRSRSAPPNLW	0.081213	0.0867435
CGHB_109_121	P01233	QCALCRRSTTDCG	0.203899	0.091953
ADDB_706_718	P35612	KKKFRTPSFLKKS	0.623208	0.0921272
CA2D1_494_506	P54289	LEDIKRLTPRFTL	0.164705	0.102742
BAD_69_81	Q92934	IRSRHSSYPAGTE	0.195464	0.117044
ACM5_498_510	P08912	CNRTFRKTFKMLL	0.0687907	0.119678
GYS2_1_13	P54840	MLRGRSLSVTSLG	0.127476	0.145907
FOXO3_25_37	O43524	QSRPRSCTWPLQR	0.0908077	0.165111
MP2K1_287_299	Q02750	PPRPRTPGRPLSS	0.152888	0.173793
KAPCG_192_206	P22612	VKGRTWTLCGTPEYL	0.127256	0.198463
MBP_222_234	P02686	HFFKNIVTPRTPP	-0.0803554	0.285063
MPIP1_172_184	P30304	FTQRQNSAPARML	-0.0581685	0.366466
NEK3_158_170	P51956	FACTYVGTPYYVP	0.120049	0.471649
H32_3_18	Q71DI3	RTKQTARKSTGGKAPR	0.144957	0.511172
MARCS_160_172	P29966	FKKSFKLSGFSFK	-0.039439	0.786895
RB_242_254	P06400	AVIPINGSPRTPR	-0.0203496	0.829526
NEK2_172_184	P51955	FAKTFVGTPYYMS	0.00700462	0.928257
CDK7_163_175	P50613	GSPNRAYTHQVVT	-0.0205638	0.952389
RB_803_815	P06400	NIYISPLKSPYKI	7.27177e-05	0.999264

## Sheet: Figure 5C
Kinase Uniprot ID	Kinase Name	Mean Specificity Score	Mean Significance Score	Mean Final Score	Median Final score	Mean Kinase Statistic	Median Kinase Statistic	SD Kinase Statitistic	Mean peptide set size
P17612	PKA[alpha]	2.0412	1.5902	3.63141	3.55284	2.32545	2.31527	0.0184852	46.3333
Q9UBS0	p70S6K[beta]	1.92076	1.5902	3.51096	3.55284	2.59871	2.5701	0.132758	22.2222
Q13237	PKG2	1.81464	1.5902	3.40485	3.52288	2.41166	2.43273	0.0524004	32.6667
Q13976	PKG1	1.78911	1.5902	3.37931	3.31876	2.37586	2.3904	0.0596119	35.4444
P31749	Akt1/PKB[alpha]	1.4111	1.5902	3.0013	3.03621	2.44182	2.42502	0.048406	24.4444
P51817	PRKX	1.53568	1.5902	3.12588	2.97306	2.44249	2.48333	0.0950916	27.3333
Q9HBY8	SGK2	1.18437	1.5902	2.77457	2.89963	2.49415	2.53315	0.0863365	13.1111
Q9P1W9	Pim2	1.30514	1.5902	2.89535	2.86391	2.34437	2.3744	0.066564	32.4444
P68400	CK2[alpha]1	1.26006	1.5902	2.85026	2.8274	3.16593	3.16593	0	3
P49674	CK1[epsilon]	1.11919	1.61979	2.73898	2.73898	2.99025	2.99025	NA	3
Q86V86	Pim3	1.04251	1.5902	2.63272	2.47366	2.21004	2.20424	0.0260454	48
O94921	PFTAIRE1	0.799611	1.60088	2.40049	2.46143	2.76938	2.76938	0	3
Q05655	PKC[delta]	0.84871	1.5902	2.43891	2.45842	2.33843	2.33907	0.0395186	19.7778
P17252	PKC[alpha]	0.823855	1.5902	2.41406	2.4437	2.29971	2.26279	0.0763033	24.3333
O14965	AurA/Aur2	0.880683	1.5902	2.47089	2.4389	2.75055	2.7484	0.00644724	4.11111
P31751	Akt2/PKB[beta]	0.83847	1.5902	2.42867	2.38934	2.3107	2.29751	0.036636	22
P11309	Pim1	0.740259	1.5902	2.33046	2.34679	2.15212	2.16739	0.0222732	51.8889
Q15131	CDK10	0.605064	1.5902	2.19527	2.28067	2.3639	2.39976	0.27386	5
Q9UKE5	TNIK/ZC2	0.612437	1.63515	2.24759	2.23671	2.53275	2.53275	0	3
O43930	PRKY	0.641468	1.5902	2.23167	2.22185	2.40343	2.47442	0.139901	9
P05129	PKC[gamma]	0.581254	1.5902	2.17146	2.21896	2.28235	2.24982	0.0660607	12.1111
Q14164	IKK[epsilon]	0.494709	1.5902	2.08491	2.13787	2.33622	2.28387	0.103867	4.77778
Q15759	p38[beta]	0.629459	1.61388	2.24334	2.1201	2.51918	2.34628	0.299474	3.66667
O15111	IKK[alpha]	0.551526	1.5902	2.14173	2.10791	2.42764	2.45189	0.0363737	3.66667
Q16566	CaMK4	0.550163	1.5902	2.14037	2.098	2.26676	2.27241	0.035046	11.7778
P23443	p70S6K	0.530811	1.5902	2.12102	2.08831	2.23908	2.17077	0.152031	13.6667
Q13464	ROCK1	0.452136	1.6127	2.06483	2.08831	2.29937	2.3109	0.015782	4.4
Q9UIK4	DAPK2	0.397355	1.6127	2.01005	2.03773	2.25398	2.25398	0	3
P05771	PKC[beta]	0.45754	1.5902	2.04774	2.01502	2.24828	2.24828	0	7
O95819	HGK/ZC1	0.395247	1.58453	1.97978	2.00908	2.18784	2.12084	0.164117	3.83333
P41743	PKC[iota]	0.354769	1.5902	1.94497	1.9514	2.117	2.11033	0.0303306	11.8889
P24723	PKC[eta]	0.337099	1.5902	1.9273	1.90518	2.10687	2.11474	0.0499037	12.4444
Q05513	PKC[zeta]	0.29247	1.5902	1.88267	1.89757	2.05419	2.03797	0.0350754	7.33333
Q13131	AMPK[alpha]1	0.314957	1.5902	1.90516	1.89008	2.07292	2.07276	0.0181088	10
Q02156	PKC[epsilon]	0.280449	1.5902	1.87065	1.88539	2.04274	2.04625	0.0780321	17.6667
Q04759	PKC[theta]	0.300726	1.5902	1.89093	1.8814	2.07083	2.07227	0.0373981	19.3333
Q96Q40	PFTAIRE2	0.311344	1.5902	1.90155	1.86774	2.06676	2.12967	0.106139	5.55556
O60285	NuaK1	0.23812	1.6127	1.85082	1.86391	1.94166	1.94166	0	3
Q96GD4	AurB/Aur1	0.258726	1.5902	1.84893	1.85912	1.99369	2.01416	0.0908887	4.11111
P48729	CK1[alpha]	0.262264	1.5902	1.85247	1.84527	1.99144	1.99602	0.0867875	8
P04049	RAF1	0.210662	1.5902	1.80087	1.84019	1.89044	1.95573	0.100317	5.33333
Q9UHD2	TBK1	0.183257	1.6127	1.79595	1.81907	1.80683	1.86892	0.0850199	3.6
P42345	mTOR/FRAP	0.181661	1.5902	1.77187	1.80311	1.81554	1.6985	0.194694	4.88889
O96017	CHK2	0.185586	1.5902	1.77579	1.80024	1.92455	1.92416	0.151615	18.7778
Q16644	MAPKAPK3	0.219694	1.5902	1.8099	1.79534	1.96405	2.06508	0.184744	28
Q13535	ATR	0.204341	1.5902	1.79455	1.78941	1.91879	1.9171	0.00504571	5.88889
O75116	ROCK2	0.102498	1.6127	1.7152	1.76976	1.57723	1.48952	0.24153	4.8
O14920	IKK[beta]	0.193044	1.5902	1.78325	1.76853	1.78615	1.89872	0.184854	3.66667
O43293	DAPK3	0.143876	1.61979	1.76366	1.76366	1.69121	1.69121	NA	3
Q00537	PCTAIRE2	0.139063	1.61979	1.75885	1.75885	1.65545	1.65545	NA	3
Q15139	PKD1	0.191316	1.5902	1.78152	1.75212	1.89264	1.89264	0	6
P16066	ANP[alpha]	0.151796	1.5902	1.742	1.73049	1.93031	1.94679	0.0688791	19.8889
Q8IWB6	SgK307	0.102407	1.61388	1.71629	1.72993	1.49102	1.49102	0	3
Q8NI60	ADCK3	0.100022	1.5902	1.69023	1.7229	1.70968	1.67802	0.0448143	8.11111
Q00532	CDKL1	0.0849754	1.6127	1.69767	1.7176	1.51622	1.32512	0.301853	5.4
Q15349	RSK1/p90RSK	0.170314	1.5902	1.76052	1.7167	1.84266	1.84266	0	6
P49841	GSK3[beta]	0.136917	1.5902	1.72712	1.70158	1.62904	1.62904	0	3
O15264	p38[delta]	0.103562	1.5902	1.69377	1.69793	1.74542	1.75976	0.161585	10
O75582	MSK1	0.124605	1.5902	1.71481	1.68361	1.76332	1.76332	0	7
Q8TD08	ERK7	0.0624821	1.61979	1.68227	1.68227	1.28707	1.28707	NA	3
Q15418	RSK3	0.0983296	1.5902	1.68853	1.65742	1.73597	1.73597	0	9
O75676	MSK2	0.0857729	1.5902	1.67598	1.65193	1.42176	1.42176	0	3
P49137	MAPKAPK2	0.0578949	1.5902	1.6481	1.64759	1.82379	1.82172	0.055127	24.1111
P51812	RSK2	0.0827239	1.5902	1.67293	1.63691	1.65015	1.65015	0	7
P45984	JNK2	0.0649069	1.5902	1.65511	1.63586	1.65647	1.68499	0.0965886	10.3333
O76039	CDKL5	0.0594289	1.44905	1.50848	1.63302	1.27397	1.26591	0.393774	4.28571
Q13153	PAK1	0.0732105	1.5902	1.66341	1.61834	1.58107	1.58107	0	6
Q16539	MAPK14	0.0208921	1.5902	1.6111	1.61034	1.32369	1.35734	0.116531	8.77778
Q00526	CDK3	0.00755348	1.5902	1.59776	1.57787	1.14909	1.13748	0.112408	7.55556
O14757	CHK1	0.0303875	1.5902	1.62059	1.57057	1.23002	1.21209	0.23404	6
P53779	JNK3	0.00518057	1.5902	1.59538	1.56876	1.3568	1.31155	0.0694601	14.2222
P45983	JNK1	0.00370412	1.5902	1.59391	1.56697	1.33983	1.31155	0.0575438	14.5556
P50750	CDK9	0.00476027	1.5902	1.59496	1.55985	0.944232	0.934603	0.0144433	5.66667
P06493	CDC2/CDK1	0.00145221	1.5902	1.59166	1.55721	0.994383	0.961683	0.0715535	8.55556
P27361	ERK1	0.00509465	1.55001	1.55511	1.55546	1.08517	0.986503	0.241186	8.77778
P50613	CDK7	0.00291244	1.5902	1.59312	1.55546	1.21277	1.24517	0.150529	10.8889
P24941	CDK2	0.00116396	1.48085	1.48201	1.52549	0.967249	1.01097	0.204108	9.11111
P53778	p38[gamma]	0.00116454	1.34362	1.34478	1.52375	0.653178	0.699045	0.350585	6.55556
Q13164	ERK5	0.000967423	1.32241	1.32337	1.52375	0.754183	0.920712	0.275898	7.11111
P28482	ERK2	0.000870622	1.4614	1.46227	1.52288	0.974964	0.989764	0.172552	9.55556
Q9Y6S9	RSKL2	0.0521465	1.44524	1.49739	1.51409	1.23016	1.23016	0.143049	3.5
P11802	CDK4	0.01877	1.32068	1.33945	1.28624	1.08526	1.04959	0.106995	4.22222
Q00535	CDK5	0.0172348	1.28155	1.29879	1.28624	1.04959	1.04959	0	4
Q00534	CDK6	0.0153577	1.1874	1.20276	1.27045	0.970874	1.04959	0.236156	3.88889
Q16512	PKN1/PRK1	0.0267984	1.32788	1.35467	1.18829	1.10716	1.00061	0.140734	4
P15056	BRAF	0.0474636	1.03692	1.08439	1.00808	1.14036	1.09314	0.141647	3.11111
P10398	ARAF	0.0407141	0.959258	0.999972	0.993654	1.09314	1.09314	0	3
Q92772	CDKL2	0.00524306	0.434152	0.439395	0.439395	0.394254	0.394254	NA	3
Q9BWU1	CDK11	0.00183921	0.42635	0.42819	0.421957	0.341124	0.341124	0	3

## Sheet: Figure 5D-E
ID	Description	KinaseRatio	BgRatio	pvalue	p.adjust	qvalue	KinaseID	Count
R-HSA-450294	MAP kinase activation	16/70	64/11009	4.40541e-22	2.84149e-19	1.31699e-19	MAPK11/CHUK/MAPKAPK3/IKBKB/RPS6KA2/RPS6KA5/RPS6KA1/MAPKAPK2/RPS6KA3/MAPK9/MAPK14/MAPK10/MAPK8/MAPK3/MAPK7/MAPK1	16
R-HSA-168164	Toll Like Receptor 3 (TLR3) Cascade	18/70	105/11009	1.44505e-21	3.46831e-19	1.60751e-19	IKBKE/MAPK11/CHUK/TBK1/MAPKAPK3/IKBKB/RPS6KA2/RPS6KA5/RPS6KA1/MAPKAPK2/RPS6KA3/MAPK9/MAPK14/MAPK10/MAPK8/MAPK3/MAPK7/MAPK1	18
R-HSA-450282	MAPK targets/ Nuclear events mediated by MAP kinases	13/70	31/11009	1.61317e-21	3.46831e-19	1.60751e-19	MAPK11/RPS6KA2/RPS6KA5/RPS6KA1/MAPKAPK2/RPS6KA3/MAPK9/MAPK14/MAPK10/MAPK8/MAPK3/MAPK7/MAPK1	13
R-HSA-166166	MyD88-independent TLR4 cascade	18/70	110/11009	3.51603e-21	3.84464e-19	1.78193e-19	IKBKE/MAPK11/CHUK/TBK1/MAPKAPK3/IKBKB/RPS6KA2/RPS6KA5/RPS6KA1/MAPKAPK2/RPS6KA3/MAPK9/MAPK14/MAPK10/MAPK8/MAPK3/MAPK7/MAPK1	18
R-HSA-937061	TRIF(TICAM1)-mediated TLR4 signaling	18/70	110/11009	3.51603e-21	3.84464e-19	1.78193e-19	IKBKE/MAPK11/CHUK/TBK1/MAPKAPK3/IKBKB/RPS6KA2/RPS6KA5/RPS6KA1/MAPKAPK2/RPS6KA3/MAPK9/MAPK14/MAPK10/MAPK8/MAPK3/MAPK7/MAPK1	18
R-HSA-448424	Interleukin-17 signaling	16/70	72/11009	3.57641e-21	3.84464e-19	1.78193e-19	MAPK11/CHUK/MAPKAPK3/IKBKB/RPS6KA2/RPS6KA5/RPS6KA1/MAPKAPK2/RPS6KA3/MAPK9/MAPK14/MAPK10/MAPK8/MAPK3/MAPK7/MAPK1	16
R-HSA-4420097	VEGFA-VEGFR2 Pathway	17/70	99/11009	2.09907e-20	1.93414e-18	8.96444e-19	PRKACA/AKT1/PRKCD/PRKCA/AKT2/MAPK11/ROCK1/PRKCB/PRKCZ/MTOR/MAPKAPK3/ROCK2/MAPK13/MAPKAPK2/PAK1/MAPK14/MAPK12	17
R-HSA-194138	Signaling by VEGF	17/70	108/11009	1.00512e-19	8.10381e-18	3.75599e-18	PRKACA/AKT1/PRKCD/PRKCA/AKT2/MAPK11/ROCK1/PRKCB/PRKCZ/MTOR/MAPKAPK3/ROCK2/MAPK13/MAPKAPK2/PAK1/MAPK14/MAPK12	17
R-HSA-168142	Toll Like Receptor 10 (TLR10) Cascade	16/70	97/11009	6.13335e-19	3.59637e-17	1.66686e-17	MAPK11/CHUK/MAPKAPK3/IKBKB/RPS6KA2/RPS6KA5/RPS6KA1/MAPKAPK2/RPS6KA3/MAPK9/MAPK14/MAPK10/MAPK8/MAPK3/MAPK7/MAPK1	16
R-HSA-168176	Toll Like Receptor 5 (TLR5) Cascade	16/70	97/11009	6.13335e-19	3.59637e-17	1.66686e-17	MAPK11/CHUK/MAPKAPK3/IKBKB/RPS6KA2/RPS6KA5/RPS6KA1/MAPKAPK2/RPS6KA3/MAPK9/MAPK14/MAPK10/MAPK8/MAPK3/MAPK7/MAPK1	16
R-HSA-975871	MyD88 cascade initiated on plasma membrane	16/70	97/11009	6.13335e-19	3.59637e-17	1.66686e-17	MAPK11/CHUK/MAPKAPK3/IKBKB/RPS6KA2/RPS6KA5/RPS6KA1/MAPKAPK2/RPS6KA3/MAPK9/MAPK14/MAPK10/MAPK8/MAPK3/MAPK7/MAPK1	16
R-HSA-166016	Toll Like Receptor 4 (TLR4) Cascade	18/70	146/11009	7.12807e-19	3.83134e-17	1.77576e-17	IKBKE/MAPK11/CHUK/TBK1/MAPKAPK3/IKBKB/RPS6KA2/RPS6KA5/RPS6KA1/MAPKAPK2/RPS6KA3/MAPK9/MAPK14/MAPK10/MAPK8/MAPK3/MAPK7/MAPK1	18
R-HSA-975138	TRAF6 mediated induction of NFkB and MAP kinases upon TLR7/8 or 9 activation	16/70	103/11009	1.68875e-18	8.37878e-17	3.88343e-17	MAPK11/CHUK/MAPKAPK3/IKBKB/RPS6KA2/RPS6KA5/RPS6KA1/MAPKAPK2/RPS6KA3/MAPK9/MAPK14/MAPK10/MAPK8/MAPK3/MAPK7/MAPK1	16
R-HSA-975155	MyD88 dependent cascade initiated on endosome	16/70	104/11009	1.98651e-18	9.15213e-17	4.24187e-17	MAPK11/CHUK/MAPKAPK3/IKBKB/RPS6KA2/RPS6KA5/RPS6KA1/MAPKAPK2/RPS6KA3/MAPK9/MAPK14/MAPK10/MAPK8/MAPK3/MAPK7/MAPK1	16
R-HSA-168181	Toll Like Receptor 7/8 (TLR7/8) Cascade	16/70	105/11009	2.33273e-18	1.00307e-16	4.64909e-17	MAPK11/CHUK/MAPKAPK3/IKBKB/RPS6KA2/RPS6KA5/RPS6KA1/MAPKAPK2/RPS6KA3/MAPK9/MAPK14/MAPK10/MAPK8/MAPK3/MAPK7/MAPK1	16
R-HSA-168138	Toll Like Receptor 9 (TLR9) Cascade	16/70	108/11009	3.73965e-18	1.50755e-16	6.98724e-17	MAPK11/CHUK/MAPKAPK3/IKBKB/RPS6KA2/RPS6KA5/RPS6KA1/MAPKAPK2/RPS6KA3/MAPK9/MAPK14/MAPK10/MAPK8/MAPK3/MAPK7/MAPK1	16
R-HSA-166058	MyD88:MAL(TIRAP) cascade initiated on plasma membrane	16/70	113/11009	7.95726e-18	2.85135e-16	1.32156e-16	MAPK11/CHUK/MAPKAPK3/IKBKB/RPS6KA2/RPS6KA5/RPS6KA1/MAPKAPK2/RPS6KA3/MAPK9/MAPK14/MAPK10/MAPK8/MAPK3/MAPK7/MAPK1	16
R-HSA-168188	Toll Like Receptor TLR6:TLR2 Cascade	16/70	113/11009	7.95726e-18	2.85135e-16	1.32156e-16	MAPK11/CHUK/MAPKAPK3/IKBKB/RPS6KA2/RPS6KA5/RPS6KA1/MAPKAPK2/RPS6KA3/MAPK9/MAPK14/MAPK10/MAPK8/MAPK3/MAPK7/MAPK1	16
R-HSA-168898	Toll-like Receptor Cascades	18/70	168/11009	9.36021e-18	3.17754e-16	1.47274e-16	IKBKE/MAPK11/CHUK/TBK1/MAPKAPK3/IKBKB/RPS6KA2/RPS6KA5/RPS6KA1/MAPKAPK2/RPS6KA3/MAPK9/MAPK14/MAPK10/MAPK8/MAPK3/MAPK7/MAPK1	18
R-HSA-168179	Toll Like Receptor TLR1:TLR2 Cascade	16/70	116/11009	1.22994e-17	3.77767e-16	1.75089e-16	MAPK11/CHUK/MAPKAPK3/IKBKB/RPS6KA2/RPS6KA5/RPS6KA1/MAPKAPK2/RPS6KA3/MAPK9/MAPK14/MAPK10/MAPK8/MAPK3/MAPK7/MAPK1	16
R-HSA-181438	Toll Like Receptor 2 (TLR2) Cascade	16/70	116/11009	1.22994e-17	3.77767e-16	1.75089e-16	MAPK11/CHUK/MAPKAPK3/IKBKB/RPS6KA2/RPS6KA5/RPS6KA1/MAPKAPK2/RPS6KA3/MAPK9/MAPK14/MAPK10/MAPK8/MAPK3/MAPK7/MAPK1	16
R-HSA-2559583	Cellular Senescence	18/70	195/11009	1.38551e-16	4.06208e-15	1.88271e-15	TNIK/MAPK11/MAP4K4/MAPKAPK3/RPS6KA2/RPS6KA1/MAPKAPK2/RPS6KA3/MAPK9/MAPK14/MAPK10/MAPK8/MAPK3/CDK2/MAPK7/MAPK1/CDK4/CDK6	18
R-HSA-5633007	Regulation of TP53 Activity	16/70	160/11009	2.33953e-15	6.56084e-14	3.04085e-14	AKT1/CSNK2A1/AURKA/AKT2/MAPK11/PRKAA1/NUAK1/AURKB/MTOR/CHEK2/ATR/MAPK14/CHEK1/CDK1/CDK2/CDK5	16
R-HSA-198753	ERK/MAPK targets	9/70	22/11009	4.64579e-15	1.24856e-13	5.78686e-14	MAPK11/RPS6KA2/RPS6KA5/RPS6KA1/RPS6KA3/MAPK14/MAPK3/MAPK7/MAPK1	9
R-HSA-187037	Signaling by NTRK1 (TRKA)	14/70	115/11009	9.71372e-15	2.50614e-13	1.16156e-13	MAPK11/MAPKAPK3/RPS6KA2/MAPK13/RPS6KA5/RPS6KA1/MAPKAPK2/RPS6KA3/MAPK14/MAPK3/MAPK12/MAPK7/MAPK1/CDK5	14
R-HSA-450341	Activation of the AP-1 family of transcription factors	7/70	10/11009	3.65089e-14	9.05701e-13	4.19778e-13	MAPK11/MAPK9/MAPK14/MAPK10/MAPK8/MAPK3/MAPK1	7
R-HSA-166520	Signaling by NTRKs	14/70	134/11009	8.5129e-14	2.03364e-12	9.42559e-13	MAPK11/MAPKAPK3/RPS6KA2/MAPK13/RPS6KA5/RPS6KA1/MAPKAPK2/RPS6KA3/MAPK14/MAPK3/MAPK12/MAPK7/MAPK1/CDK5	14
R-HSA-198725	Nuclear Events (kinase and transcription factor activation)	11/70	61/11009	9.84972e-14	2.26895e-12	1.05162e-12	MAPK11/RPS6KA2/RPS6KA5/RPS6KA1/MAPKAPK2/RPS6KA3/MAPK14/MAPK3/MAPK7/MAPK1/CDK5	11
R-HSA-6804756	Regulation of TP53 Activity through Phosphorylation	12/70	92/11009	3.96858e-13	8.82667e-12	4.09102e-12	CSNK2A1/AURKA/MAPK11/PRKAA1/NUAK1/AURKB/CHEK2/ATR/MAPK14/CHEK1/CDK2/CDK5	12
R-HSA-2559580	Oxidative Stress Induced Senescence	13/70	124/11009	6.83908e-13	1.4704e-11	6.81508e-12	TNIK/MAPK11/MAP4K4/MAPKAPK3/MAPKAPK2/MAPK9/MAPK14/MAPK10/MAPK8/MAPK3/MAPK1/CDK4/CDK6	13
R-HSA-5668599	RHO GTPases Activate NADPH Oxidases	8/70	24/11009	1.20031e-12	2.49742e-11	1.15751e-11	PRKCD/PRKCA/MAPK11/PRKCB/PRKCZ/MAPK14/MAPK3/MAPK1	8
R-HSA-3700989	Transcriptional Regulation by TP53	18/70	362/11009	6.46351e-12	1.3028e-10	6.03828e-11	AKT1/CSNK2A1/AURKA/AKT2/MAPK11/PRKAA1/NUAK1/AURKB/MTOR/CHEK2/ATR/MAPK14/CHEK1/CDK9/CDK1/CDK7/CDK2/CDK5	18
R-HSA-449147	Signaling by Interleukins	20/70	473/11009	6.80182e-12	1.32945e-10	6.16178e-11	PRKACA/AKT1/PIM1/MAPK11/CHUK/TBK1/MAPKAPK3/IKBKB/RPS6KA2/RPS6KA5/RPS6KA1/MAPKAPK2/RPS6KA3/MAPK9/MAPK14/MAPK10/MAPK8/MAPK3/MAPK7/MAPK1	20
R-HSA-881907	Gastrin-CREB signalling pathway via PKC and MAPK	7/70	18/11009	9.30079e-12	1.76442e-10	8.17779e-11	PRKCA/RPS6KA2/RPS6KA1/RPS6KA3/MAPK3/MAPK7/MAPK1	7
R-HSA-376172	DSCAM interactions	6/70	11/11009	2.39267e-11	4.40934e-10	2.04366e-10	MAPK11/MAPK13/PAK1/MAPK14/MAPK8/MAPK12	6
R-HSA-187687	Signalling to ERKs	8/70	34/11009	2.81795e-11	5.04883e-10	2.34005e-10	MAPK11/MAPKAPK3/MAPK13/MAPKAPK2/MAPK14/MAPK3/MAPK12/MAPK1	8
R-HSA-9006925	Intracellular signaling by second messengers	16/70	310/11009	6.67279e-11	1.16323e-09	5.39139e-10	PRKACA/RPS6KB2/AKT1/PRKX/CSNK2A1/PRKCD/PRKCA/AKT2/PRKCG/CHUK/CAMK4/PRKCE/MTOR/GSK3B/MAPK3/MAPK1	16
R-HSA-171007	p38MAPK events	6/70	13/11009	8.79866e-11	1.49346e-09	6.92194e-10	MAPK11/MAPKAPK3/MAPK13/MAPKAPK2/MAPK14/MAPK12	6
R-HSA-438064	Post NMDA receptor activation events	9/70	80/11009	1.61974e-09	2.6788e-08	1.24158e-08	PRKACA/PRKX/CAMK4/PRKAA1/RPS6KA2/RPS6KA1/RPS6KA3/MAPK3/MAPK1	9
R-HSA-167044	Signalling to RAS	6/70	20/11009	1.91908e-09	3.09451e-08	1.43426e-08	MAPK11/MAPKAPK3/MAPK13/MAPKAPK2/MAPK14/MAPK12	6
R-HSA-111996	Ca-dependent events	7/70	39/11009	4.04517e-09	6.36375e-08	2.9495e-08	PRKACA/PRKX/PRKCD/PRKCA/PRKCG/CAMK4/MAPK1	7
R-HSA-112314	Neurotransmitter receptors and postsynaptic signal transmission	12/70	205/11009	5.19835e-09	7.98318e-08	3.70008e-08	PRKACA/PRKX/PRKCA/PRKCG/CAMK4/PRKCB/PRKAA1/RPS6KA2/RPS6KA1/RPS6KA3/MAPK3/MAPK1	12
R-HSA-442755	Activation of NMDA receptors and postsynaptic events	9/70	93/11009	6.29406e-09	9.44108e-08	4.37579e-08	PRKACA/PRKX/CAMK4/PRKAA1/RPS6KA2/RPS6KA1/RPS6KA3/MAPK3/MAPK1	9
R-HSA-1489509	DAG and IP3 signaling	7/70	43/11009	8.30634e-09	1.21434e-07	5.62827e-08	PRKACA/PRKX/PRKCD/PRKCA/PRKCG/CAMK4/PRKCE	7
R-HSA-5674400	Constitutive Signaling by AKT1 E17K in Cancer	6/70	25/11009	8.55221e-09	1.21434e-07	5.62827e-08	RPS6KB2/AKT1/AKT2/CHUK/MTOR/GSK3B	6
R-HSA-76002	Platelet activation, signaling and aggregation	13/70	263/11009	8.6604e-09	1.21434e-07	5.62827e-08	AKT1/PRKCD/PRKCA/PRKCG/PRKCB/PRKCH/PRKCZ/PRKCE/PRKCQ/RAF1/MAPK14/MAPK3/MAPK1	13
R-HSA-418597	G alpha (z) signalling events	7/70	48/11009	1.85085e-08	2.53999e-07	1.17725e-07	PRKCD/PRKCA/PRKCG/PRKCB/PRKCH/PRKCE/PRKCQ	7
R-HSA-373752	Netrin-1 signaling	7/70	50/11009	2.48574e-08	3.34022e-07	1.54814e-07	MAPK11/PRKCQ/MAPK13/PAK1/MAPK14/MAPK8/MAPK12	7
R-HSA-2559582	Senescence-Associated Secretory Phenotype (SASP)	9/70	110/11009	2.79009e-08	3.67267e-07	1.70222e-07	RPS6KA2/RPS6KA1/RPS6KA3/MAPK3/CDK2/MAPK7/MAPK1/CDK4/CDK6	9
R-HSA-112043	PLC beta mediated events	7/70	51/11009	2.86677e-08	3.69813e-07	1.71403e-07	PRKACA/PRKX/PRKCD/PRKCA/PRKCG/CAMK4/MAPK1	7
R-HSA-2871796	FCERI mediated MAPK activation	6/70	32/11009	4.22566e-08	5.34421e-07	2.47696e-07	MAPK9/PAK1/MAPK10/MAPK8/MAPK3/MAPK1	6
R-HSA-373760	L1CAM interactions	9/70	119/11009	5.55524e-08	6.81534e-07	3.15881e-07	CSNK2A1/RPS6KA2/RPS6KA5/RPS6KA1/RPS6KA4/RPS6KA3/PAK1/MAPK3/MAPK1	9
R-HSA-112040	G-protein mediated events	7/70	56/11009	5.60021e-08	6.81534e-07	3.15881e-07	PRKACA/PRKX/PRKCD/PRKCA/PRKCG/CAMK4/MAPK1	7
R-HSA-6804757	Regulation of TP53 Degradation	6/70	36/11009	8.90308e-08	1.06342e-06	4.9288e-07	AKT1/AKT2/MTOR/CHEK2/CDK1/CDK2	6
R-HSA-416476	G alpha (q) signalling events	11/70	217/11009	1.05717e-07	1.1559e-06	5.3574e-07	PRKCD/PRKCA/PRKCH/PRKCE/PRKCQ/RPS6KA2/RPS6KA1/RPS6KA3/MAPK3/MAPK7/MAPK1	11
R-HSA-111933	Calmodulin induced events	6/70	37/11009	1.05733e-07	1.1559e-06	5.3574e-07	PRKACA/PRKX/PRKCD/PRKCA/PRKCG/CAMK4	6
R-HSA-111997	CaM pathway	6/70	37/11009	1.05733e-07	1.1559e-06	5.3574e-07	PRKACA/PRKX/PRKCD/PRKCA/PRKCG/CAMK4	6
R-HSA-168638	NOD1/2 Signaling Pathway	6/70	37/11009	1.05733e-07	1.1559e-06	5.3574e-07	MAPK11/CHUK/IKBKB/MAPK13/MAPK14/MAPK12	6
R-HSA-6806003	Regulation of TP53 Expression and Degradation	6/70	37/11009	1.05733e-07	1.1559e-06	5.3574e-07	AKT1/AKT2/MTOR/CHEK2/CDK1/CDK2	6
R-HSA-111885	Opioid Signalling	8/70	92/11009	1.07931e-07	1.16026e-06	5.37762e-07	PRKACA/PRKX/PRKCD/PRKCA/PRKCG/CAMK4/MAPK1/CDK5	8
R-HSA-112315	Transmission across Chemical Synapses	12/70	270/11009	1.11321e-07	1.17708e-06	5.45559e-07	PRKACA/PRKX/PRKCA/PRKCG/CAMK4/PRKCB/PRKAA1/RPS6KA2/RPS6KA1/RPS6KA3/MAPK3/MAPK1	12
R-HSA-2454202	Fc epsilon receptor (FCERI) signaling	9/70	134/11009	1.5539e-07	1.61655e-06	7.49247e-07	CHUK/PRKCQ/IKBKB/MAPK9/PAK1/MAPK10/MAPK8/MAPK3/MAPK1	9
R-HSA-109581	Apoptosis	10/70	180/11009	1.80582e-07	1.84881e-06	8.56896e-07	AKT1/PRKCD/AKT2/ROCK1/DAPK2/PRKCQ/DAPK3/MAPK8/MAPK3/MAPK1	10
R-HSA-437239	Recycling pathway of L1	6/70	47/11009	4.64568e-07	4.68198e-06	2.17002e-06	RPS6KA2/RPS6KA5/RPS6KA1/RPS6KA4/RPS6KA3/MAPK1	6
R-HSA-195258	RHO GTPase Effectors	12/70	326/11009	8.45423e-07	8.38283e-06	3.88531e-06	PRKCD/PRKCA/MAPK11/ROCK1/PRKCB/PRKCZ/AURKB/ROCK2/PAK1/MAPK14/MAPK3/MAPK1	12
R-HSA-5357801	Programmed Cell Death	10/70	213/11009	8.57777e-07	8.38283e-06	3.88531e-06	AKT1/PRKCD/AKT2/ROCK1/DAPK2/PRKCQ/DAPK3/MAPK8/MAPK3/MAPK1	10
R-HSA-442742	CREB1 phosphorylation through NMDA receptor-mediated activation of RAS signaling	5/70	29/11009	9.48389e-07	9.13002e-06	4.23162e-06	RPS6KA2/RPS6KA1/RPS6KA3/MAPK3/MAPK1	5
R-HSA-198323	AKT phosphorylates targets in the cytosol	4/70	14/11009	1.43e-06	1.35639e-05	6.28668e-06	AKT1/AKT2/CHUK/GSK3B	4
R-HSA-168643	Nucleotide-binding domain, leucine rich repeat containing receptor (NLR) signaling pathways	6/70	57/11009	1.49359e-06	1.39618e-05	6.47107e-06	MAPK11/CHUK/IKBKB/MAPK13/MAPK14/MAPK12	6
R-HSA-165159	MTOR signalling	5/70	41/11009	5.64132e-06	5.19807e-05	2.40923e-05	AKT1/AKT2/RPS6KB1/PRKAA1/MTOR	5
R-HSA-195721	Signaling by WNT	11/70	331/11009	6.81013e-06	6.18666e-05	2.86742e-05	PRKG2/PRKG1/AKT1/CSNK2A1/CSNK1E/PRKCA/AKT2/PRKCG/PRKCB/CSNK1A1/GSK3B	11
R-HSA-445144	Signal transduction by L1	4/70	21/11009	8.2674e-06	7.20604e-05	3.33989e-05	CSNK2A1/PAK1/MAPK3/MAPK1	4
R-HSA-5218921	VEGFR2 mediated cell proliferation	4/70	21/11009	8.2674e-06	7.20604e-05	3.33989e-05	PRKCD/PRKCA/PRKCB/PRKCZ	4
R-HSA-5621575	CD209 (DC-SIGN) signaling	4/70	21/11009	8.2674e-06	7.20604e-05	3.33989e-05	PRKACA/RAF1/RPS6KA5/PAK1	4
R-HSA-112316	Neuronal System	12/70	410/11009	9.09838e-06	7.82461e-05	3.62658e-05	PRKACA/PRKX/PRKCA/PRKCG/CAMK4/PRKCB/PRKAA1/RPS6KA2/RPS6KA1/RPS6KA3/MAPK3/MAPK1	12
R-HSA-8878166	Transcriptional regulation by RUNX2	7/70	121/11009	1.10006e-05	9.33606e-05	4.32712e-05	AKT1/AKT2/GSK3B/CDK1/MAPK3/MAPK1/CDK4	7
R-HSA-5357905	Regulation of TNFR1 signaling	5/70	48/11009	1.24534e-05	0.000104317	4.83494e-05	IKBKE/CHUK/TBK1/IKBKB/MAPKAPK2	5
R-HSA-450302	activated TAK1 mediates p38 MAPK activation	4/70	24/11009	1.44685e-05	0.000118129	5.47508e-05	MAPK11/MAPKAPK3/MAPKAPK2/MAPK14	4
R-HSA-9634638	Estrogen-dependent nuclear events downstream of ESR-membrane signaling	4/70	24/11009	1.44685e-05	0.000118129	5.47508e-05	AKT1/AKT2/MAPK3/MAPK1	4
R-HSA-1227986	Signaling by ERBB2	5/70	50/11009	1.52586e-05	0.000123022	5.70189e-05	AKT1/PRKCD/PRKCA/AKT2/PRKCE	5
R-HSA-450531	Regulation of mRNA stability by proteins that bind AU-rich elements	6/70	88/11009	1.91095e-05	0.000152168	7.05275e-05	AKT1/PRKCD/PRKCA/MAPK11/MAPKAPK2/MAPK14	6
R-HSA-3371556	Cellular response to heat stress	6/70	89/11009	2.0389e-05	0.000160377	7.4332e-05	MTOR/ATR/GSK3B/MAPKAPK2/MAPK3/MAPK1	6
R-HSA-114508	Effects of PIP2 hydrolysis	4/70	27/11009	2.35549e-05	0.000183047	8.48394e-05	PRKCD/PRKCH/PRKCE/PRKCQ	4
R-HSA-109606	Intrinsic Pathway for Apoptosis	5/70	55/11009	2.44442e-05	0.000187697	8.69944e-05	AKT1/AKT2/MAPK8/MAPK3/MAPK1	5
R-HSA-2151209	Activation of PPARGC1A (PGC-1alpha) by phosphorylation	3/70	10/11009	2.86161e-05	0.000217146	0.000100644	MAPK11/MAPK14/MAPK12	3
R-HSA-75893	TNF signaling	5/70	57/11009	2.91336e-05	0.000218502	0.000101272	IKBKE/CHUK/TBK1/IKBKB/MAPKAPK2	5
R-HSA-5218920	VEGFR2 mediated vascular permeability	4/70	29/11009	3.15734e-05	0.000234078	0.000108492	AKT1/AKT2/MTOR/PAK1	4
R-HSA-5621481	C-type lectin receptors (CLRs)	7/70	143/11009	3.26065e-05	0.000238991	0.000110769	PRKACA/PRKCD/CHUK/RAF1/IKBKB/RPS6KA5/PAK1	7
R-HSA-453279	Mitotic G1 phase and G1/S transition	7/70	149/11009	4.24449e-05	0.000307606	0.000142571	AKT1/AKT2/CDK1/CDK7/CDK2/CDK4/CDK6	7
R-HSA-1257604	PIP3 activates AKT signaling	9/70	268/11009	4.65886e-05	0.000333885	0.00015475	RPS6KB2/AKT1/CSNK2A1/AKT2/CHUK/MTOR/GSK3B/MAPK3/MAPK1	9
R-HSA-2219528	PI3K/AKT Signaling in Cancer	6/70	104/11009	4.94043e-05	0.000350173	0.0001623	RPS6KB2/AKT1/AKT2/CHUK/MTOR/GSK3B	6
R-HSA-73887	Death Receptor Signaling	7/70	154/11009	5.2398e-05	0.000366168	0.000169713	IKBKE/CHUK/PRKCI/TBK1/IKBKB/MAPKAPK2/MAPK8	7
R-HSA-2559585	Oncogene Induced Senescence	4/70	33/11009	5.3364e-05	0.000366168	0.000169713	MAPK3/MAPK1/CDK4/CDK6	4
R-HSA-389356	CD28 co-stimulation	4/70	33/11009	5.3364e-05	0.000366168	0.000169713	AKT1/AKT2/MTOR/PAK1	4
R-HSA-373755	Semaphorin interactions	5/70	65/11009	5.52555e-05	0.000375155	0.000173879	ROCK1/ROCK2/GSK3B/PAK1/CDK5	5
R-HSA-202670	ERKs are inactivated	3/70	13/11009	6.72735e-05	0.000447334	0.000207332	MAPK3/MAPK7/MAPK1	3
R-HSA-75035	Chk1/Chk2(Cds1) mediated inactivation of Cyclin B:Cdk1 complex	3/70	13/11009	6.72735e-05	0.000447334	0.000207332	CHEK2/CHEK1/CDK1	3
R-HSA-3371453	Regulation of HSF1-mediated heat shock response	5/70	69/11009	7.37181e-05	0.000485185	0.000224876	ATR/GSK3B/MAPKAPK2/MAPK3/MAPK1	5
R-HSA-5663202	Diseases of signal transduction by growth factor receptors and second messengers	11/70	433/11009	8.16229e-05	0.000531785	0.000246474	RPS6KB2/AKT1/AKT2/PIM1/CHUK/CSNK1A1/RAF1/MTOR/GSK3B/MAPK3/MAPK1	11
R-HSA-162658	Golgi Cisternae Pericentriolar Stack Reorganization	3/70	14/11009	8.52308e-05	0.000549739	0.000254795	CDK1/MAPK3/MAPK1	3
R-HSA-4419969	Depolymerization of the Nuclear Lamina	3/70	15/11009	0.000106053	0.000670631	0.000310827	PRKCA/PRKCB/CDK1	3
R-HSA-5099900	WNT5A-dependent internalization of FZD4	3/70	15/11009	0.000106053	0.000670631	0.000310827	PRKCA/PRKCG/PRKCB	3
R-HSA-9009391	Extra-nuclear estrogen signaling	5/70	77/11009	0.000124606	0.000780303	0.000361658	AKT1/AKT2/PRKCZ/MAPK3/MAPK1	5
R-HSA-392517	Rap1 signalling	3/70	16/11009	0.000129933	0.000805834	0.000373491	PRKACA/PRKG1/RAF1	3
R-HSA-9755511	KEAP1-NFE2L2 pathway	6/70	126/11009	0.000143715	0.000882822	0.000409174	AKT1/CSNK2A1/PRKCD/AKT2/PRKCI/GSK3B	6
R-HSA-5675221	Negative regulation of MAPK pathway	4/70	43/11009	0.000153415	0.000920928	0.000426836	RAF1/MAPK3/MAPK12/MAPK1	4
R-HSA-416993	Trafficking of GluR2-containing AMPA receptors	3/70	17/11009	0.000157058	0.000920928	0.000426836	PRKCA/PRKCG/PRKCB	3
R-HSA-450604	KSRP (KHSRP) binds and destabilizes mRNA	3/70	17/11009	0.000157058	0.000920928	0.000426836	AKT1/MAPK11/MAPK14	3
R-HSA-9659787	Aberrant regulation of mitotic G1/S transition in cancer due to RB1 defects	3/70	17/11009	0.000157058	0.000920928	0.000426836	CDK2/CDK4/CDK6	3
R-HSA-9661069	Defective binding of RB1 mutants to E2F1,(E2F2, E2F3)	3/70	17/11009	0.000157058	0.000920928	0.000426836	CDK2/CDK4/CDK6	3
R-HSA-69202	Cyclin E associated events during G1/S transition	5/70	83/11009	0.000177797	0.0010244	0.000474795	AKT1/AKT2/CDK7/CDK2/CDK4	5
R-HSA-69206	G1/S Transition	6/70	131/11009	0.000177881	0.0010244	0.000474795	AKT1/AKT2/CDK1/CDK7/CDK2/CDK4	6
R-HSA-69656	Cyclin A:Cdk2-associated events at S phase entry	5/70	85/11009	0.000198904	0.00113534	0.00052621	AKT1/AKT2/CDK7/CDK2/CDK4	5
R-HSA-5683057	MAPK family signaling cascades	9/70	325/11009	0.00020311	0.00114918	0.000532625	PRKACA/PRKG2/PRKCQ/RAF1/PAK1/CDK1/MAPK3/MAPK12/MAPK1	9
R-HSA-2029480	Fcgamma receptor (FCGR) dependent phagocytosis	5/70	86/11009	0.000210148	0.00117866	0.000546289	PRKCD/PRKCE/PAK1/MAPK3/MAPK1	5
R-HSA-69231	Cyclin D associated events in G1	4/70	47/11009	0.000217529	0.0011992	0.000555809	CDK7/CDK2/CDK4/CDK6	4
R-HSA-69236	G1 Phase	4/70	47/11009	0.000217529	0.0011992	0.000555809	CDK7/CDK2/CDK4/CDK6	4
R-HSA-6807070	PTEN Regulation	6/70	140/11009	0.000255332	0.00139567	0.000646871	AKT1/CSNK2A1/AKT2/MTOR/MAPK3/MAPK1	6
R-HSA-5627117	RHO GTPases Activate ROCKs	3/70	20/11009	0.000259725	0.00140775	0.000652471	ROCK1/ROCK2/PAK1	3
R-HSA-9679506	SARS-CoV Infections	10/70	414/11009	0.000266999	0.00143512	0.000665154	AKT1/AKT2/IKBKE/CHUK/ROCK1/CSNK1A1/TBK1/ROCK2/IKBKB/GSK3B	10
R-HSA-1606322	ZBP1(DAI) mediated induction of type I IFNs	3/70	21/11009	0.000301635	0.00160789	0.00074523	CHUK/TBK1/IKBKB	3
R-HSA-1250196	SHC1 events in ERBB2 signaling	3/70	22/11009	0.000347673	0.00180846	0.000838193	PRKCD/PRKCA/PRKCE	3
R-HSA-389357	CD28 dependent PI3K/Akt signaling	3/70	22/11009	0.000347673	0.00180846	0.000838193	AKT1/AKT2/MTOR	3
R-HSA-9768919	NPAS4 regulates expression of target genes	3/70	22/11009	0.000347673	0.00180846	0.000838193	MAPK3/MAPK1/CDK5	3
R-HSA-112409	RAF-independent MAPK1/3 activation	3/70	23/11009	0.000398007	0.00203742	0.000944311	CDK1/MAPK3/MAPK1	3
R-HSA-450321	JNK (c-Jun kinases) phosphorylation and activation mediated by activated human TAK1	3/70	23/11009	0.000398007	0.00203742	0.000944311	MAPK9/MAPK10/MAPK8	3
R-HSA-69273	Cyclin A/B1/B2 associated events during G2/M transition	3/70	25/11009	0.000512206	0.00260136	0.00120569	CDK1/CDK7/CDK2	3
R-HSA-69242	S Phase	6/70	162/11009	0.000557687	0.00281022	0.00130249	AKT1/AKT2/GSK3B/CDK7/CDK2/CDK4	6
R-HSA-9694516	SARS-CoV-2 Infection	8/70	299/11009	0.000589743	0.00292979	0.00135791	AKT1/AKT2/IKBKE/CHUK/CSNK1A1/TBK1/IKBKB/GSK3B	8
R-HSA-9658195	Leishmania infection	6/70	164/11009	0.000595043	0.00292979	0.00135791	PRKACA/PRKX/MAPK14/MAPK8/MAPK3/MAPK1	6
R-HSA-9824443	Parasitic Infection Pathways	6/70	164/11009	0.000595043	0.00292979	0.00135791	PRKACA/PRKX/MAPK14/MAPK8/MAPK3/MAPK1	6
R-HSA-6796648	TP53 Regulates Transcription of DNA Repair Genes	4/70	62/11009	0.000633283	0.00309445	0.00143423	ATR/CHEK1/CDK9/CDK7	4
R-HSA-418594	G alpha (i) signalling events	8/70	318/11009	0.000882359	0.00422268	0.00195715	PRKACA/PRKX/PRKCD/PRKCA/PRKCG/CAMK4/MAPK1/CDK5	8
R-HSA-114452	Activation of BH3-only proteins	3/70	30/11009	0.000883818	0.00422268	0.00195715	AKT1/AKT2/MAPK8	3
R-HSA-525793	Myogenesis	3/70	30/11009	0.000883818	0.00422268	0.00195715	MAPK11/MAPK14/MAPK12	3
R-HSA-388841	Costimulation by the CD28 family	4/70	69/11009	0.000949179	0.00450162	0.00208643	AKT1/AKT2/MTOR/PAK1	4
R-HSA-399719	Trafficking of AMPA receptors	3/70	31/11009	0.000974073	0.00455273	0.00211012	PRKCA/PRKCG/PRKCB	3
R-HSA-399721	Glutamate binding, activation of AMPA receptors and synaptic plasticity	3/70	31/11009	0.000974073	0.00455273	0.00211012	PRKCA/PRKCG/PRKCB	3
R-HSA-397795	G-protein beta:gamma signalling	3/70	32/11009	0.00106997	0.00496495	0.00230117	AKT1/AKT2/PAK1	3
R-HSA-9022692	Regulation of MECP2 expression and activity	3/70	33/11009	0.00117163	0.00536345	0.00248587	PRKACA/CAMK4/AURKB	3
R-HSA-8854518	AURKA Activation by TPX2	4/70	73/11009	0.00117247	0.00536345	0.00248587	PRKACA/CSNK1E/AURKA/CDK1	4
R-HSA-68886	M Phase	9/70	416/11009	0.00121345	0.00551178	0.00255462	PRKACA/CSNK2A1/CSNK1E/PRKCA/PRKCB/AURKB/CDK1/MAPK3/MAPK1	9
R-HSA-9634815	Transcriptional Regulation by NPAS4	3/70	34/11009	0.00127918	0.00576974	0.00267419	MAPK3/MAPK1/CDK5	3
R-HSA-9687139	Aberrant regulation of mitotic cell cycle due to RB1 defects	3/70	35/11009	0.00139277	0.00623843	0.00289142	CDK2/CDK4/CDK6	3
R-HSA-2173796	SMAD2/SMAD3:SMAD4 heterotrimer regulates transcription	3/70	36/11009	0.0015125	0.00668192	0.00309697	CDK9/MAPK3/MAPK1	3
R-HSA-6802948	Signaling by high-kinase activity BRAF mutants	3/70	36/11009	0.0015125	0.00668192	0.00309697	RAF1/MAPK3/MAPK1	3
R-HSA-69275	G2/M Transition	6/70	197/11009	0.00154137	0.00675696	0.00313174	PRKACA/CSNK1E/AURKA/CDK1/CDK7/CDK2	6
R-HSA-913531	Interferon Signaling	7/70	269/11009	0.00155043	0.00675696	0.00313174	PRKCD/CHUK/RAF1/IKBKB/CDK1/MAPK3/MAPK1	7
R-HSA-453274	Mitotic G2-G2/M phases	6/70	199/11009	0.00162277	0.00699888	0.00324387	PRKACA/CSNK1E/AURKA/CDK1/CDK7/CDK2	6
R-HSA-176187	Activation of ATR in response to replication stress	3/70	37/11009	0.0016385	0.00699888	0.00324387	ATR/CHEK1/CDK2	3
R-HSA-9675126	Diseases of mitotic cell cycle	3/70	37/11009	0.0016385	0.00699888	0.00324387	CDK2/CDK4/CDK6	3
R-HSA-110056	MAPK3 (ERK1) activation	2/70	10/11009	0.00173535	0.00726819	0.00336869	CDK1/MAPK3	2
R-HSA-418889	Caspase activation via Dependence Receptors in the absence of ligand	2/70	10/11009	0.00173535	0.00726819	0.00336869	DAPK2/DAPK3	2
R-HSA-74749	Signal attenuation	2/70	10/11009	0.00173535	0.00726819	0.00336869	MAPK3/MAPK1	2
R-HSA-111465	Apoptotic cleavage of cellular proteins	3/70	38/11009	0.00177088	0.00732193	0.0033936	PRKCD/ROCK1/PRKCQ	3
R-HSA-9013407	RHOH GTPase cycle	3/70	38/11009	0.00177088	0.00732193	0.0033936	ROCK1/ROCK2/PAK1	3
R-HSA-9705683	SARS-CoV-2-host interactions	6/70	203/11009	0.00179537	0.00736882	0.00341533	AKT1/AKT2/IKBKE/CHUK/TBK1/IKBKB	6
R-HSA-168928	DDX58/IFIH1-mediated induction of interferon-alpha/beta	4/70	82/11009	0.00180508	0.00736882	0.00341533	IKBKE/CHUK/TBK1/IKBKB	4
R-HSA-68875	Mitotic Prophase	5/70	141/11009	0.00199285	0.00808421	0.00374691	PRKCA/PRKCB/CDK1/MAPK3/MAPK1	5
R-HSA-5674135	MAP2K and MAPK activation	3/70	40/11009	0.00205527	0.00823386	0.00381627	RAF1/MAPK3/MAPK1	3
R-HSA-8853659	RET signaling	3/70	40/11009	0.00205527	0.00823386	0.00381627	PRKACA/PRKCA/MAPK7	3
R-HSA-111458	Formation of apoptosome	2/70	11/11009	0.00211228	0.00825709	0.00382703	MAPK3/MAPK1	2
R-HSA-2514853	Condensation of Prometaphase Chromosomes	2/70	11/11009	0.00211228	0.00825709	0.00382703	CSNK2A1/CDK1	2
R-HSA-9614399	Regulation of localization of FOXO transcription factors	2/70	11/11009	0.00211228	0.00825709	0.00382703	AKT1/AKT2	2
R-HSA-9627069	Regulation of the apoptosome activity	2/70	11/11009	0.00211228	0.00825709	0.00382703	MAPK3/MAPK1	2
R-HSA-5684996	MAPK1/MAPK3 signaling	7/70	286/11009	0.00219706	0.00853679	0.00395667	PRKG2/PRKCQ/RAF1/CDK1/MAPK3/MAPK12/MAPK1	7
R-HSA-174143	APC/C-mediated degradation of cell cycle proteins	4/70	87/11009	0.00224319	0.00856129	0.00396802	AURKA/AURKB/CDK1/CDK2	4
R-HSA-453276	Regulation of mitotic cell cycle	4/70	87/11009	0.00224319	0.00856129	0.00396802	AURKA/AURKB/CDK1/CDK2	4
R-HSA-5628897	TP53 Regulates Metabolic Genes	4/70	87/11009	0.00224319	0.00856129	0.00396802	AKT1/AKT2/PRKAA1/MTOR	4
R-HSA-3858494	Beta-catenin independent WNT signaling	5/70	146/11009	0.00232071	0.00880503	0.00408099	PRKG2/PRKG1/PRKCA/PRKCG/PRKCB	5
R-HSA-2565942	Regulation of PLK1 Activity at G2/M Transition	4/70	88/11009	0.00233886	0.00882203	0.00408887	PRKACA/CSNK1E/AURKA/CDK1	4
R-HSA-3928662	EPHB-mediated forward signaling	3/70	42/11009	0.00236655	0.00887457	0.00411322	ROCK1/ROCK2/PAK1	3
R-HSA-9711123	Cellular response to chemical stress	6/70	215/11009	0.00239768	0.00893932	0.00414323	AKT1/CSNK2A1/PRKCD/AKT2/PRKCI/GSK3B	6
R-HSA-1474151	Tetrahydrobiopterin (BH4) synthesis, recycling, salvage and regulation	2/70	12/11009	0.00252434	0.00917689	0.00425334	PRKG2/AKT1	2
R-HSA-170968	Frs2-mediated activation	2/70	12/11009	0.00252434	0.00917689	0.00425334	MAPK3/MAPK1	2
R-HSA-9013973	TICAM1-dependent activation of IRF3/IRF7	2/70	12/11009	0.00252434	0.00917689	0.00425334	IKBKE/TBK1	2
R-HSA-9755779	SARS-CoV-2 targets host intracellular signalling and regulatory pathways	2/70	12/11009	0.00252434	0.00917689	0.00425334	AKT1/AKT2	2
R-HSA-9656223	Signaling by RAF1 mutants	3/70	43/11009	0.00253254	0.00917689	0.00425334	RAF1/MAPK3/MAPK1	3
R-HSA-1852241	Organelle biogenesis and maintenance	7/70	296/11009	0.00266494	0.00960272	0.00445071	PRKACA/CSNK1E/MAPK11/CAMK4/MAPK14/CDK1/MAPK12	7
R-HSA-8939211	ESR-mediated signaling	6/70	222/11009	0.00281309	0.0100802	0.00467203	AKT1/AKT2/PRKCZ/CDK9/MAPK3/MAPK1	6
R-HSA-111461	Cytochrome c-mediated apoptotic response	2/70	13/11009	0.00297108	0.0102532	0.00475221	MAPK3/MAPK1	2
R-HSA-1358803	Downregulation of ERBB2:ERBB3 signaling	2/70	13/11009	0.00297108	0.0102532	0.00475221	AKT1/AKT2	2
R-HSA-209543	p75NTR recruits signalling complexes	2/70	13/11009	0.00297108	0.0102532	0.00475221	PRKCI/IKBKB	2
R-HSA-879415	Advanced glycosylation endproduct receptor signaling	2/70	13/11009	0.00297108	0.0102532	0.00475221	MAPK3/MAPK1	2
R-HSA-933543	NF-kB activation through FADD/RIP-1 pathway mediated by caspase-8 and -10	2/70	13/11009	0.00297108	0.0102532	0.00475221	CHUK/IKBKB	2
R-HSA-170834	Signaling by TGF-beta Receptor Complex	4/70	94/11009	0.00297264	0.0102532	0.00475221	PRKCZ/CDK9/MAPK3/MAPK1	4
R-HSA-69473	G2/M DNA damage checkpoint	4/70	94/11009	0.00297264	0.0102532	0.00475221	CHEK2/ATR/CHEK1/CDK1	4
R-HSA-1592230	Mitochondrial biogenesis	4/70	95/11009	0.0030886	0.0105965	0.00491133	MAPK11/CAMK4/MAPK14/MAPK12	4
R-HSA-877300	Interferon gamma signaling	4/70	96/11009	0.00320762	0.0108086	0.00500962	PRKCD/RAF1/MAPK3/MAPK1	4
R-HSA-6802946	Signaling by moderate kinase activity BRAF mutants	3/70	47/11009	0.00326778	0.0108086	0.00500962	RAF1/MAPK3/MAPK1	3
R-HSA-6802949	Signaling by RAS mutants	3/70	47/11009	0.00326778	0.0108086	0.00500962	RAF1/MAPK3/MAPK1	3
R-HSA-6802955	Paradoxical activation of RAF signaling by kinase inactive BRAF	3/70	47/11009	0.00326778	0.0108086	0.00500962	RAF1/MAPK3/MAPK1	3
R-HSA-9649948	Signaling downstream of RAS mutants	3/70	47/11009	0.00326778	0.0108086	0.00500962	RAF1/MAPK3/MAPK1	3
R-HSA-169893	Prolonged ERK activation events	2/70	14/11009	0.00345205	0.0108086	0.00500962	MAPK3/MAPK1	2
R-HSA-442720	CREB1 phosphorylation through the activation of Adenylate Cyclase	2/70	14/11009	0.00345205	0.0108086	0.00500962	PRKACA/PRKX	2
R-HSA-4839735	Signaling by AXIN mutants	2/70	14/11009	0.00345205	0.0108086	0.00500962	CSNK1A1/GSK3B	2
R-HSA-4839744	Signaling by APC mutants	2/70	14/11009	0.00345205	0.0108086	0.00500962	CSNK1A1/GSK3B	2
R-HSA-4839748	Signaling by AMER1 mutants	2/70	14/11009	0.00345205	0.0108086	0.00500962	CSNK1A1/GSK3B	2
R-HSA-5467337	APC truncation mutants have impaired AXIN binding	2/70	14/11009	0.00345205	0.0108086	0.00500962	CSNK1A1/GSK3B	2
R-HSA-5467340	AXIN missense mutants destabilize the destruction complex	2/70	14/11009	0.00345205	0.0108086	0.00500962	CSNK1A1/GSK3B	2
R-HSA-5467348	Truncations of AMER1 destabilize the destruction complex	2/70	14/11009	0.00345205	0.0108086	0.00500962	CSNK1A1/GSK3B	2
R-HSA-6804759	Regulation of TP53 Activity through Association with Co-factors	2/70	14/11009	0.00345205	0.0108086	0.00500962	AKT1/AKT2	2
R-HSA-9005891	Loss of function of MECP2 in Rett syndrome	2/70	14/11009	0.00345205	0.0108086	0.00500962	PRKACA/CAMK4	2
R-HSA-9005895	Pervasive developmental disorders	2/70	14/11009	0.00345205	0.0108086	0.00500962	PRKACA/CAMK4	2
R-HSA-9675151	Disorders of Developmental Biology	2/70	14/11009	0.00345205	0.0108086	0.00500962	PRKACA/CAMK4	2
R-HSA-9697154	Disorders of Nervous System Development	2/70	14/11009	0.00345205	0.0108086	0.00500962	PRKACA/CAMK4	2
R-HSA-6791312	TP53 Regulates Transcription of Cell Cycle Genes	3/70	48/11009	0.00346989	0.010812	0.00501118	AURKA/CDK1/CDK2	3
R-HSA-201681	TCF dependent signaling in response to WNT	6/70	232/11009	0.00349757	0.0108458	0.00502688	AKT1/CSNK2A1/CSNK1E/AKT2/CSNK1A1/GSK3B	6
R-HSA-111447	Activation of BAD and translocation to mitochondria	2/70	15/11009	0.00396682	0.0116831	0.00541493	AKT1/AKT2	2
R-HSA-4839743	Signaling by CTNNB1 phospho-site mutants	2/70	15/11009	0.00396682	0.0116831	0.00541493	CSNK1A1/GSK3B	2
R-HSA-5339716	Signaling by GSK3beta mutants	2/70	15/11009	0.00396682	0.0116831	0.00541493	CSNK1A1/GSK3B	2
R-HSA-5358747	CTNNB1 S33 mutants aren't phosphorylated	2/70	15/11009	0.00396682	0.0116831	0.00541493	CSNK1A1/GSK3B	2
R-HSA-5358749	CTNNB1 S37 mutants aren't phosphorylated	2/70	15/11009	0.00396682	0.0116831	0.00541493	CSNK1A1/GSK3B	2
R-HSA-5358751	CTNNB1 S45 mutants aren't phosphorylated	2/70	15/11009	0.00396682	0.0116831	0.00541493	CSNK1A1/GSK3B	2
R-HSA-5358752	CTNNB1 T41 mutants aren't phosphorylated	2/70	15/11009	0.00396682	0.0116831	0.00541493	CSNK1A1/GSK3B	2
R-HSA-918233	TRAF3-dependent IRF activation pathway	2/70	15/11009	0.00396682	0.0116831	0.00541493	IKBKE/TBK1	2
R-HSA-937039	IRAK1 recruits IKK complex	2/70	15/11009	0.00396682	0.0116831	0.00541493	CHUK/IKBKB	2
R-HSA-9694631	Maturation of nucleoprotein	2/70	15/11009	0.00396682	0.0116831	0.00541493	CSNK1A1/GSK3B	2
R-HSA-975144	IRAK1 recruits IKK complex upon TLR7/8 or 9 stimulation	2/70	15/11009	0.00396682	0.0116831	0.00541493	CHUK/IKBKB	2
R-HSA-2173793	Transcriptional activity of SMAD2/SMAD3:SMAD4 heterotrimer	3/70	51/11009	0.00412154	0.0120767	0.00559737	CDK9/MAPK3/MAPK1	3
R-HSA-69481	G2/M Checkpoints	5/70	167/11009	0.00413791	0.0120767	0.00559737	CHEK2/ATR/CHEK1/CDK1/CDK2	5
R-HSA-5693532	DNA Double-Strand Break Repair	5/70	168/11009	0.00424412	0.0123309	0.00571517	CHEK2/ATR/CHEK1/MAPK8/CDK2	5
R-HSA-2980766	Nuclear Envelope Breakdown	3/70	52/11009	0.00435414	0.0125376	0.00581097	PRKCA/PRKCB/CDK1	3
R-HSA-75153	Apoptotic execution phase	3/70	52/11009	0.00435414	0.0125376	0.00581097	PRKCD/ROCK1/PRKCQ	3
R-HSA-1295596	Spry regulation of FGF signaling	2/70	16/11009	0.00451495	0.0127168	0.00589402	MAPK3/MAPK1	2
R-HSA-193639	p75NTR signals via NF-kB	2/70	16/11009	0.00451495	0.0127168	0.00589402	PRKCI/IKBKB	2
R-HSA-399956	CRMPs in Sema3A signaling	2/70	16/11009	0.00451495	0.0127168	0.00589402	GSK3B/CDK5	2
R-HSA-418457	cGMP effects	2/70	16/11009	0.00451495	0.0127168	0.00589402	PRKG2/PRKG1	2
R-HSA-5684264	MAP3K8 (TPL2)-dependent MAPK1/3 activation	2/70	16/11009	0.00451495	0.0127168	0.00589402	CHUK/IKBKB	2
R-HSA-74751	Insulin receptor signalling cascade	3/70	54/11009	0.00484289	0.0134641	0.00624039	AKT2/MAPK3/MAPK1	3
R-HSA-8848021	Signaling by PTK6	3/70	54/11009	0.00484289	0.0134641	0.00624039	AKT1/CDK2/CDK4	3
R-HSA-9006927	Signaling by Non-Receptor Tyrosine Kinases	3/70	54/11009	0.00484289	0.0134641	0.00624039	AKT1/CDK2/CDK4	3
R-HSA-1502540	Signaling by Activin	2/70	17/11009	0.005096	0.0139276	0.00645523	MAPK3/MAPK1	2
R-HSA-1810476	RIP-mediated NFkB activation via ZBP1	2/70	17/11009	0.005096	0.0139276	0.00645523	CHUK/IKBKB	2
R-HSA-196299	Beta-catenin phosphorylation cascade	2/70	17/11009	0.005096	0.0139276	0.00645523	CSNK1A1/GSK3B	2
R-HSA-450385	Butyrate Response Factor 1 (BRF1) binds and destabilizes mRNA	2/70	17/11009	0.005096	0.0139276	0.00645523	AKT1/MAPKAPK2	2
R-HSA-6804114	TP53 Regulates Transcription of Genes Involved in G2 Cell Cycle Arrest	2/70	18/11009	0.00570955	0.0154086	0.00714165	AURKA/CDK1	2
R-HSA-936964	Activation of IRF3, IRF7 mediated by TBK1, IKBKE	2/70	18/11009	0.00570955	0.0154086	0.00714165	IKBKE/TBK1	2
R-HSA-9758274	Regulation of NF-kappa B signaling	2/70	18/11009	0.00570955	0.0154086	0.00714165	CHUK/IKBKB	2
R-HSA-199418	Negative regulation of the PI3K/AKT network	4/70	113/11009	0.00573559	0.0154144	0.00714433	AKT1/AKT2/MAPK3/MAPK1	4
R-HSA-9725371	Nuclear events stimulated by ALK signaling in cancer	2/70	19/11009	0.00635517	0.0170086	0.00788324	MAPK3/MAPK1	2
R-HSA-5610783	Degradation of GLI2 by the proteasome	3/70	60/11009	0.00650272	0.0172603	0.00799988	PRKACA/CSNK1A1/GSK3B	3
R-HSA-5610785	GLI3 is processed to GLI3R by the proteasome	3/70	60/11009	0.00650272	0.0172603	0.00799988	PRKACA/CSNK1A1/GSK3B	3
R-HSA-2029482	Regulation of actin dynamics for phagocytic cup formation	3/70	61/11009	0.00680827	0.0179238	0.00830741	PAK1/MAPK3/MAPK1	3
R-HSA-8943724	Regulation of PTEN gene transcription	3/70	61/11009	0.00680827	0.0179238	0.00830741	MTOR/MAPK3/MAPK1	3
R-HSA-111471	Apoptotic factor-mediated response	2/70	20/11009	0.00703244	0.0183641	0.00851145	MAPK3/MAPK1	2
R-HSA-168927	TICAM1, RIP1-mediated IKK complex recruitment	2/70	20/11009	0.00703244	0.0183641	0.00851145	CHUK/IKBKB	2
R-HSA-202403	TCR signaling	4/70	120/11009	0.00707901	0.0183754	0.00851672	CHUK/PRKCQ/IKBKB/PAK1	4
R-HSA-4086398	Ca2+ pathway	3/70	62/11009	0.00712226	0.0183754	0.00851672	PRKG2/PRKG1/PRKCA	3
R-HSA-8986944	Transcriptional Regulation by MECP2	3/70	62/11009	0.00712226	0.0183754	0.00851672	PRKACA/CAMK4/AURKB	3
R-HSA-375165	NCAM signaling for neurite out-growth	3/70	63/11009	0.00744472	0.0191309	0.00886685	RPS6KA5/MAPK3/MAPK1	3
R-HSA-210745	Regulation of gene expression in beta cells	2/70	21/11009	0.00774094	0.01958	0.00907504	AKT1/AKT2	2
R-HSA-389513	CTLA4 inhibitory signaling	2/70	21/11009	0.00774094	0.01958	0.00907504	AKT1/AKT2	2
R-HSA-416572	Sema4D induced cell migration and growth-cone collapse	2/70	21/11009	0.00774094	0.01958	0.00907504	ROCK1/ROCK2	2
R-HSA-8978934	Metabolism of cofactors	2/70	21/11009	0.00774094	0.01958	0.00907504	PRKG2/AKT1	2
R-HSA-1834949	Cytosolic sensors of pathogen-associated DNA	3/70	64/11009	0.00777572	0.0195912	0.0090802	CHUK/TBK1/IKBKB	3
R-HSA-9006936	Signaling by TGFB family members	4/70	124/11009	0.00793292	0.0199095	0.00922773	PRKCZ/CDK9/MAPK3/MAPK1	4
R-HSA-9705671	SARS-CoV-2 activates/modulates innate and adaptive immune responses	4/70	126/11009	0.00838423	0.020957	0.00971324	IKBKE/CHUK/TBK1/IKBKB	4
R-HSA-111931	PKA-mediated phosphorylation of CREB	2/70	22/11009	0.00848027	0.020957	0.00971324	PRKACA/PRKX	2
R-HSA-1181150	Signaling by NODAL	2/70	22/11009	0.00848027	0.020957	0.00971324	MAPK3/MAPK1	2
R-HSA-392154	Nitric oxide stimulates guanylate cyclase	2/70	22/11009	0.00848027	0.020957	0.00971324	PRKG2/PRKG1	2
R-HSA-5673001	RAF/MAP kinase cascade	6/70	280/11009	0.00862177	0.0212254	0.00983762	PRKG2/PRKCQ/RAF1/MAPK3/MAPK12/MAPK1	6
R-HSA-1169091	Activation of NF-kappaB in B cells	3/70	67/11009	0.00882042	0.0215499	0.00998803	CHUK/PRKCB/IKBKB	3
R-HSA-6802952	Signaling by BRAF and RAF1 fusions	3/70	67/11009	0.00882042	0.0215499	0.00998803	RAF1/MAPK3/MAPK1	3
R-HSA-69615	G1/S DNA Damage Checkpoints	3/70	68/11009	0.00918605	0.0223455	0.0103568	CHEK2/CHEK1/CDK2	3
R-HSA-9013422	RHOBTB1 GTPase cycle	2/70	23/11009	0.00925001	0.0223455	0.0103568	ROCK1/ROCK2	2
R-HSA-9637690	Response of Mtb to phagocytosis	2/70	23/11009	0.00925001	0.0223455	0.0103568	MAPK3/MAPK1	2
R-HSA-68877	Mitotic Prometaphase	5/70	204/11009	0.00950641	0.0228792	0.0106042	PRKACA/CSNK2A1/CSNK1E/AURKB/CDK1	5
R-HSA-8948751	Regulation of PTEN stability and activity	3/70	69/11009	0.00956045	0.0229238	0.0106248	AKT1/CSNK2A1/AKT2	3
R-HSA-380259	Loss of Nlp from mitotic centrosomes	3/70	70/11009	0.00994367	0.0236573	0.0109648	PRKACA/CSNK1E/CDK1	3
R-HSA-380284	Loss of proteins required for interphase microtubule organization from the centrosome	3/70	70/11009	0.00994367	0.0236573	0.0109648	PRKACA/CSNK1E/CDK1	3
R-HSA-166208	mTORC1-mediated signalling	2/70	24/11009	0.0100498	0.0236573	0.0109648	RPS6KB1/MTOR	2
R-HSA-8940973	RUNX2 regulates osteoblast differentiation	2/70	24/11009	0.0100498	0.0236573	0.0109648	MAPK3/MAPK1	2
R-HSA-982772	Growth hormone receptor signaling	2/70	24/11009	0.0100498	0.0236573	0.0109648	MAPK3/MAPK1	2
R-HSA-69620	Cell Cycle Checkpoints	6/70	292/11009	0.010476	0.024571	0.0113883	AURKB/CHEK2/ATR/CHEK1/CDK1/CDK2	6
R-HSA-2029485	Role of phospholipids in phagocytosis	2/70	25/11009	0.0108791	0.0249716	0.011574	PRKCD/PRKCE	2
R-HSA-392451	G beta:gamma signalling through PI3Kgamma	2/70	25/11009	0.0108791	0.0249716	0.011574	AKT1/AKT2	2
R-HSA-400685	Sema4D in semaphorin signaling	2/70	25/11009	0.0108791	0.0249716	0.011574	ROCK1/ROCK2	2
R-HSA-5357786	TNFR1-induced proapoptotic signaling	2/70	25/11009	0.0108791	0.0249716	0.011574	IKBKE/TBK1	2
R-HSA-933542	TRAF6 mediated NF-kB activation	2/70	25/11009	0.0108791	0.0249716	0.011574	CHUK/IKBKB	2
R-HSA-937041	IKK complex recruitment mediated by RIP1	2/70	25/11009	0.0108791	0.0249716	0.011574	CHUK/IKBKB	2
R-HSA-9006931	Signaling by Nuclear Receptors	6/70	298/11009	0.0115027	0.0263094	0.012194	AKT1/AKT2/PRKCZ/CDK9/MAPK3/MAPK1	6
R-HSA-180024	DARPP-32 events	2/70	26/11009	0.0117377	0.0267519	0.0123991	PRKACA/CDK5	2
R-HSA-9833482	PKR-mediated signaling	3/70	75/11009	0.0119933	0.0272384	0.0126246	CHUK/IKBKB/CDK1	3
R-HSA-1538133	G0 and Early G1	2/70	27/11009	0.012625	0.0282748	0.0131049	CDK1/CDK2	2
R-HSA-5357769	Caspase activation via extrinsic apoptotic signalling pathway	2/70	27/11009	0.012625	0.0282748	0.0131049	DAPK2/DAPK3	2
R-HSA-9635486	Infection with Mycobacterium tuberculosis	2/70	27/11009	0.012625	0.0282748	0.0131049	MAPK3/MAPK1	2
R-HSA-9648002	RAS processing	2/70	27/11009	0.012625	0.0282748	0.0131049	PRKG2/PRKCQ	2
R-HSA-9662851	Anti-inflammatory response favouring Leishmania parasite infection	3/70	79/11009	0.0137953	0.0306827	0.014221	PRKACA/PRKX/MAPK14	3
R-HSA-9664433	Leishmania parasite growth and survival	3/70	79/11009	0.0137953	0.0306827	0.014221	PRKACA/PRKX/MAPK14	3
R-HSA-380972	Energy dependent regulation of mTOR by LKB1-AMPK	2/70	29/11009	0.0144847	0.0318861	0.0147787	PRKAA1/MTOR	2
R-HSA-5654732	Negative regulation of FGFR3 signaling	2/70	29/11009	0.0144847	0.0318861	0.0147787	MAPK3/MAPK1	2
R-HSA-8863795	Downregulation of ERBB2 signaling	2/70	29/11009	0.0144847	0.0318861	0.0147787	AKT1/AKT2	2
R-HSA-1169410	Antiviral mechanism by IFN-stimulated genes	4/70	149/11009	0.0148203	0.032514	0.0150697	CHUK/IKBKB/CDK1/MAPK3	4
R-HSA-2871837	FCERI mediated NF-kB activation	3/70	82/11009	0.0152427	0.0329917	0.0152911	CHUK/PRKCQ/IKBKB	3
R-HSA-380270	Recruitment of mitotic centrosome proteins and complexes	3/70	82/11009	0.0152427	0.0329917	0.0152911	PRKACA/CSNK1E/CDK1	3
R-HSA-380287	Centrosome maturation	3/70	82/11009	0.0152427	0.0329917	0.0152911	PRKACA/CSNK1E/CDK1	3
R-HSA-74752	Signaling by Insulin receptor	3/70	82/11009	0.0152427	0.0329917	0.0152911	AKT2/MAPK3/MAPK1	3
R-HSA-2173795	Downregulation of SMAD2/3:SMAD4 transcriptional activity	2/70	30/11009	0.0154562	0.0330107	0.0152999	MAPK3/MAPK1	2
R-HSA-3928663	EPHA-mediated growth cone collapse	2/70	30/11009	0.0154562	0.0330107	0.0152999	ROCK1/ROCK2	2
R-HSA-6804758	Regulation of TP53 Activity through Acetylation	2/70	30/11009	0.0154562	0.0330107	0.0152999	AKT1/AKT2	2
R-HSA-933541	TRAF6 mediated IRF7 activation	2/70	30/11009	0.0154562	0.0330107	0.0152999	IKBKE/TBK1	2
R-HSA-1168372	Downstream signaling events of B Cell Receptor (BCR)	3/70	83/11009	0.0157435	0.0335133	0.0155329	CHUK/PRKCB/IKBKB	3
R-HSA-446652	Interleukin-1 family signaling	4/70	153/11009	0.016187	0.0343442	0.015918	CHUK/TBK1/IKBKB/MAPK8	4
R-HSA-6802957	Oncogenic MAPK signaling	3/70	84/11009	0.0162535	0.0343477	0.0159196	RAF1/MAPK3/MAPK1	3
R-HSA-4641262	Disassembly of the destruction complex and recruitment of AXIN to the membrane	2/70	31/11009	0.0164549	0.0343477	0.0159196	CSNK1A1/GSK3B	2
R-HSA-5260271	Diseases of Immune System	2/70	31/11009	0.0164549	0.0343477	0.0159196	CHUK/IKBKB	2
R-HSA-5602358	Diseases associated with the TLR signaling cascade	2/70	31/11009	0.0164549	0.0343477	0.0159196	CHUK/IKBKB	2
R-HSA-5654733	Negative regulation of FGFR4 signaling	2/70	31/11009	0.0164549	0.0343477	0.0159196	MAPK3/MAPK1	2
R-HSA-8878171	Transcriptional regulation by RUNX1	5/70	236/11009	0.0169836	0.0353369	0.0163781	CSNK2A1/PRKCB/PRKCQ/CDK7/CDK6	5
R-HSA-456926	Thrombin signalling through proteinase activated receptors (PARs)	2/70	32/11009	0.0174806	0.0361378	0.0167493	MAPK3/MAPK1	2
R-HSA-8941326	RUNX2 regulates bone development	2/70	32/11009	0.0174806	0.0361378	0.0167493	MAPK3/MAPK1	2
R-HSA-418346	Platelet homeostasis	3/70	88/11009	0.0183862	0.0378884	0.0175607	PRKG2/PRKG1/MAPK14	3
R-HSA-5357956	TNFR1-induced NF-kappa-B signaling pathway	2/70	33/11009	0.0185328	0.0379481	0.0175883	CHUK/IKBKB	2
R-HSA-5654726	Negative regulation of FGFR1 signaling	2/70	33/11009	0.0185328	0.0379481	0.0175883	MAPK3/MAPK1	2
R-HSA-5687128	MAPK6/MAPK4 signaling	3/70	89/11009	0.0189425	0.0386643	0.0179203	PRKACA/PAK1/CDK1	3
R-HSA-73894	DNA Repair	6/70	335/11009	0.0194577	0.0395907	0.0183497	CHEK2/ATR/CHEK1/MAPK8/CDK7/CDK2	6
R-HSA-4791275	Signaling by WNT in cancer	2/70	34/11009	0.0196111	0.0396526	0.0183784	CSNK1A1/GSK3B	2
R-HSA-5654727	Negative regulation of FGFR2 signaling	2/70	34/11009	0.0196111	0.0396526	0.0183784	MAPK3/MAPK1	2
R-HSA-2682334	EPH-Ephrin signaling	3/70	92/11009	0.0206674	0.0413664	0.0191727	ROCK1/ROCK2/PAK1	3
R-HSA-4086400	PCP/CE pathway	3/70	92/11009	0.0206674	0.0413664	0.0191727	PRKCA/PRKCG/PRKCB	3
R-HSA-936440	Negative regulators of DDX58/IFIH1 signaling	2/70	35/11009	0.0207153	0.0413664	0.0191727	IKBKE/TBK1	2
R-HSA-9706574	RHOBTB GTPase Cycle	2/70	35/11009	0.0207153	0.0413664	0.0191727	ROCK1/ROCK2	2
R-HSA-2514859	Inactivation, recovery and regulation of the phototransduction cascade	2/70	36/11009	0.0218449	0.0432584	0.0200496	PRKCA/PRKCQ	2
R-HSA-5663213	RHO GTPases Activate WASPs and WAVEs	2/70	36/11009	0.0218449	0.0432584	0.0200496	MAPK3/MAPK1	2
R-HSA-380320	Recruitment of NuMA to mitotic centrosomes	3/70	94/11009	0.0218639	0.0432584	0.0200496	PRKACA/CSNK1E/CDK1	3
R-HSA-2514856	The phototransduction cascade	2/70	37/11009	0.0229995	0.045366	0.0210264	PRKCA/PRKCQ	2
R-HSA-193704	p75 NTR receptor-mediated signalling	3/70	97/11009	0.0237286	0.0465196	0.0215611	PRKCI/IKBKB/MAPK8	3
R-HSA-5693607	Processing of DNA double-strand break ends	3/70	97/11009	0.0237286	0.0465196	0.0215611	ATR/CHEK1/CDK2	3
R-HSA-9607240	FLT3 Signaling	2/70	38/11009	0.0241789	0.0472587	0.0219037	AKT1/AKT2	2
R-HSA-202424	Downstream TCR signaling	3/70	98/11009	0.0243688	0.0473431	0.0219428	CHUK/PRKCQ/IKBKB	3
R-HSA-5620912	Anchoring of the basal body to the plasma membrane	3/70	98/11009	0.0243688	0.0473431	0.0219428	PRKACA/CSNK1E/CDK1	3
R-HSA-9679191	Potential therapeutics for SARS	3/70	99/11009	0.0250184	0.048459	0.02246	ROCK1/TBK1/ROCK2	3
