# Supplementary material for: MicroRNA-26b protects against MASH development in mice and can be efficiently targeted with lipid nanoparticles
Source: eLife. 2025 Apr 22;13:RP97165. doi: 10.7554/eLife.97165 (PMC12014130; doi:10.7554/eLife.97165)
Supplement: Figure 6—figure supplement 1—source data 1. [file elife-97165-fig6-figsupp1-data1.xlsx]

## Sheet: Figure 6-figure supplement 1A
	Apoe-/- mir26b-/- +eLNP	Apoe-/- mir26b-/- +mLNP
	0.784035	141.974
	1.33438	23.9941
	0.128035	244.339
	0.187444	59.11
	0.765289	279.35
	2.80082	336.478

## Sheet: Figure 6-figure supplement 1B
	Apoe-/- mir26b-/- +eLNP	Apoe-/- mir26b-/- +mLNP
	1.03722	95.6892
	1.27032	27.5069
	0.358509	174.853
	0.416118	32.296
	0.644036	181.532
	2.27379	218.271
