# Supplementary material for: MicroRNA-26b protects against MASH development in mice and can be efficiently targeted with lipid nanoparticles
Source: eLife. 2025 Apr 22;13:RP97165. doi: 10.7554/eLife.97165 (PMC12014130; doi:10.7554/eLife.97165)
Supplement: Figure 7—figure supplement 1—source data 1. [file elife-97165-fig7-figsupp1-data1.xlsx]

## Sheet: Figure 7-figure supplement 1A
BioNavigator Version	6.3.67.0	PamGrid Version	QuantitationType	Default_Mean	Protocol file name	STK Basis Processing TemplateDate	Mon, 23 Oct 2023 16:12:07 GMT
				Sample name	V682	V684	V685	V686		V695	V697	V699	V700		V689	V690	V691	V692
				2_Treatment	A_WT	A_WT	A_WT	A_WT		B_KO	B_KO	B_KO	B_KO		C_KO-LNP	C_KO-LNP	C_KO-LNP	C_KO-LNP
				2_Replicate	1	2	3	4		1	2	3	4		1	2	3	4
Sequence	UniprotAccession	ID	Description
LQARRRQSVLNLM	P13569	CFTR_761_773	Cystic fibrosis transmembrane conductance regulator (CFTR) (cAMP-dependent chloride channel) (ATP-binding cassette transporter sub-family C member 7).		13.1264	13.2254	13.1639	13.2625	13.1946	13.3606	13.2716	13.4295	13.4072	13.3672	13.3725	13.2786	13.342	13.2877	13.3202
NPLMRRNSVTPLA	Q16875	F263_454_466	6-phosphofructo-2-kinase/fructose-2,6-biphosphatase 3 (6PF-2-K/Fru-2,6-P2ASE brain/placenta-type isozyme) (iPFK-2) (Renal carcinomaantigen NY-REN-56) [Includes: 6-phosphofructo-2-kinase (EC 2.7.1.105);Fructose-2,6-bisphosphatase (EC 3.1.3.46)].		12.7314	12.8533	12.782	12.8853	12.813	13.0364	13.0248	13.0956	13.0909	13.0619	13.0285	12.8572	12.9747	12.9307	12.9478
RRKRKPSTSDDSD	P11388	TOP2A_1463_1475	DNA topoisomerase 2-alpha (EC=5.99.1.3) (DNA topoisomerase II, alpha isozyme).		12.4773	12.5034	12.4151	12.5751	12.4927	12.7109	12.6505	12.714	12.7109	12.6966	12.7007	12.5219	12.585	12.5256	12.5833
ANRERRPSYLPTP	P17658	KCNA6_504_516	Potassium voltage-gated channel subfamily A member 6 (Voltage-gatedpotassium channel subunit Kv1.6) (HBK2).		12.3709	12.4308	12.3465	12.4457	12.3985	12.5881	12.5939	12.5853	12.6463	12.6034	12.5748	12.4169	12.5225	12.4758	12.4975
NRFTRRASVCAEA	P31323	KAP3_107_119	cAMP-dependent protein kinase type II-beta regulatory subunit.		12.3819	12.3862	12.2524	12.4291	12.3624	12.5453	12.53	12.5117	12.6058	12.5482	12.4988	12.283	12.4361	12.3726	12.3976
LSAFRRTSLAGGG	Q14896	MYPC3_268_280	Myosin-binding protein C, cardiac-type (Cardiac MyBP-C) (C-protein,cardiac muscle isoform).		12.1348	12.2506	12.2216	12.3536	12.2402	12.5404	12.5562	12.6039	12.4627	12.5408	12.5216	12.2717	12.4181	12.4037	12.4038
SRLRRRASQLKIT	P47870	GBRB2_427_439	Gamma-aminobutyric acid receptor subunit beta-2 precursor (GABA(A)receptor subunit beta-2).		12.2604	12.2888	12.2299	12.3382	12.2793	12.4769	12.5469	12.5137	12.5367	12.5186	12.4737	12.353	12.38	12.3804	12.3968
FIGRRQSLIEDAR	P07101	TY3H_65_77	Tyrosine 3-monooxygenase (EC 1.14.16.2) (Tyrosine 3-hydroxylase) (TH).		12.0056	12.0163	11.938	12.3252	12.0713	12.3699	12.3149	12.4398	12.274	12.3497	12.3194	12.1379	12.1988	12.1031	12.1898
SSRRTTLCGTLDY	O14965	STK6_283_295	Serine/threonine-protein kinase 6 (EC 2.7.11.1) (Aurora kinase A)(Aurora-A) (Serine/threonine kinase 15) (Aurora/IPL1-related kinase 1)(Aurora-related kinase 1) (hARK1) (Breast tumor-amplified kinase).		12.0608	12.0791	11.9701	12.105	12.0537	12.2987	12.2793	12.2872	12.405	12.3175	12.2251	12.0317	12.2132	12.1129	12.1457
FMSSRRQSVLVKS	Q13002	GRIK2_708_720	Glutamate receptor, ionotropic kainate 2 precursor (Glutamate receptor6) (GluR-6) (GluR6) (Excitatory amino acid receptor 4) (EAA4).		12.0297	11.9833	11.94	12.1874	12.0351	12.2533	12.2322	12.279	12.2531	12.2544	12.2533	12.0449	12.2064	12.0288	12.1334
ASLGRRASFHLEC	Q13936	CAC1C_1974_1986	Voltage-dependent L-type calcium channel subunit alpha-1C (Voltage-gated calcium channel subunit alpha Cav1.2) (Calcium channel, L type,alpha-1 polypeptide, isoform 1, cardiac muscle).		11.8741	11.9046	11.738	11.9832	11.875	12.1448	12.1481	12.104	12.1916	12.1471	12.0856	11.8112	12.0369	11.8803	11.9535
LLNKRRGSVPILR	P16452	EPB42_241_253	Erythrocyte membrane protein band 4.2 (Erythrocyte protein 4.2)(P4.2).		11.6621	11.7797	11.6243	11.8895	11.7389	12.0791	12.139	12.0695	12.0884	12.094	12.0715	11.7448	11.9613	11.8558	11.9083
ELLCLRRSSLKAY	P07550	ADRB2_338_350	Beta-2 adrenergic receptor (Beta-2 adrenoceptor) (Beta-2adrenoreceptor).		11.7479	11.6969	11.5473	11.8861	11.7196	12.044	12.0553	12.0094	12.07	12.0447	11.9892	11.6501	11.8934	11.6827	11.8039
EILSRRPSYRKIL	P16220	CREB1_126_138	cAMP response element-binding protein (CREB).		11.5961	11.8228	11.7294	11.9574	11.7764	12.0457	12.0694	12.0545	11.9724	12.0355	12.0268	11.8602	11.9688	11.8377	11.9234
EPLERRLSLVPDS	P13569	CFTR_730_742	Cystic fibrosis transmembrane conductance regulator (CFTR) (cAMP-dependent chloride channel) (ATP-binding cassette transporter sub-family C member 7).		11.5064	11.5982	11.5217	11.7958	11.6055	11.9367	11.9809	12.0488	11.8241	11.9476	11.9282	11.6444	11.8133	11.8111	11.7993
EHIERRVSNAGGP	P50552	VASP_150_162	Vasodilator-stimulated phosphoprotein (VASP).		11.3924	11.6371	11.4568	11.5142	11.5001	11.8925	11.9304	12.0003	11.9653	11.9471	11.8289	11.4903	11.8094	11.784	11.7282
FMRLRRLSTKYRT	Q05209	PTN12_32_44	Tyrosine-protein phosphatase non-receptor type 12 (EC 3.1.3.48)(Protein-tyrosine phosphatase G1) (PTPG1) (PTP-PEST).		11.5608	11.6127	11.5067	11.6971	11.5943	11.8321	11.8656	11.8693	11.9565	11.8809	11.8339	11.6319	11.736	11.5998	11.7004
QDAYRRNSVRFLQ	P14598	NCF1_321_333	Neutrophil cytosol factor 1 (NCF-1) (Neutrophil NADPH oxidase factor1) (47 kDa neutrophil oxidase factor) (p47-phox) (NCF-47K) (47 kDaautosomal chronic granulomatous disease protein) (Nox organizer 2)(Nox-organizing protein 2) (SH3 and PX domain-containing protein 1A).		11.3008	11.4686	11.4067	11.6026	11.4447	11.8037	11.8155	11.8275	11.7294	11.794	11.7514	11.5091	11.6523	11.5539	11.6167
GRKRRQTSMTDFY	P38936	CDN1A_139_151	Cyclin-dependent kinase inhibitor 1 (p21) (CDK-interacting protein 1) (Melanoma differentiation-associated protein 6) (MDA-6).		11.5083	11.6099	11.539	11.6357	11.5732	11.7257	11.7952	11.8209	11.6728	11.7537	11.7199	11.5605	11.7123	11.7182	11.6777
SRFNRRVSVCAET	P13861	KAP2_92_104	cAMP-dependent protein kinase type II-alpha regulatory subunit.		11.3641	11.3079	11.2736	11.4619	11.3519	11.6596	11.6563	11.6515	11.6727	11.66	11.6182	11.3165	11.5333	11.4508	11.4797
QVEFRRLSISAES	P46020	KPB1_1011_1023	Phosphorylase b kinase regulatory subunit alpha, skeletal muscleisoform (Phosphorylase kinase alpha M subunit).		11.1719	11.257	11.1585	11.4077	11.2488	11.5982	11.7084	11.6814	11.5783	11.6415	11.6096	11.2411	11.4864	11.4445	11.4454
NIHLEKKYVRRDS	P07333	CSF1R_701_713	Macrophage colony-stimulating factor 1 receptor precursor(EC 2.7.10.1) (CSF-1-R) (Fms proto-oncogene) (c-fms) (CD115 antigen).		11.1226	11.3458	11.1342	11.3215	11.231	11.6241	11.6731	11.662	11.5423	11.6254	11.5982	11.154	11.504	11.3992	11.4138
NQNSRRPSRATWL	P04004	VTNC_390_402	Vitronectin precursor (Serum-spreading factor) (S-protein) (V75)[Contains: Vitronectin V65 subunit; Vitronectin V10 subunit;Somatomedin-B].		11.1199	11.2563	11.162	11.3974	11.2339	11.5108	11.5177	11.5411	11.4663	11.509	11.4697	11.2152	11.3909	11.291	11.3417
ALRERLSSFTSYE	Q13882	PTK6_436_448	Tyrosine-protein kinase 6 (EC 2.7.10.2) (Breast tumor kinase)(Tyrosine-protein kinase BRK).		10.9833	11.1809	11.0902	11.1075	11.0905	11.4608	11.5066	11.5747	11.4549	11.4992	11.4069	11.1381	11.337	11.4211	11.3258
RGAPPRRSSIRNA	P14598	NCF1_296_308	Neutrophil cytosol factor 1 (NCF-1) (Neutrophil NADPH oxidase factor1) (47 kDa neutrophil oxidase factor) (p47-phox) (NCF-47K) (47 kDaautosomal chronic granulomatous disease protein) (Nox organizer 2)(Nox-organizing protein 2) (SH3 and PX domain-containing protein 1A).		10.7809	10.9566	10.9126	11.0691	10.9298	11.2325	11.2714	11.2989	11.1345	11.2343	11.1963	10.9802	11.0965	11.0374	11.0776
IAKRRRLSSLRAS	P62753	RS6_228_240	40S ribosomal protein S6 (Phosphoprotein NP33).		10.846	10.8453	10.7806	11.0639	10.884	11.1708	11.1814	11.2063	11.1781	11.1841	11.1323	10.8956	11.0272	10.8952	10.9876
SFKRRRSSKDTST	Q05586	NMDZ1_890_902	Glutamate [NMDA] receptor subunit zeta-1 precursor (N-methyl-D-aspartate receptor subunit NR1).		10.4618	10.66	10.4551	10.5221	10.5247	11.0361	11.121	11.0019	11.0389	11.0495	10.8783	10.5871	10.901	10.7996	10.7915
FVQLRRKSDLETS	P19838	NFKB1_330_342	Nuclear factor NF-kappa-B p105 subunit (DNA-binding factor KBF1) (EBP-1) [Contains: Nuclear factor NF-kappa-B p50 subunit].		10.4738	10.6592	10.5232	10.7823	10.6096	11.0101	11.0752	11.0235	10.9791	11.022	10.9588	10.6489	10.8873	10.7325	10.8069
AILRRPTSPVSRE	P03255	E1A_ADE05_212_224	Early E1A 32 kDa protein.		10.0949	10.3312	10.2242	10.3742	10.2561	10.5509	10.5755	10.5958	10.4842	10.5516	10.4956	10.2708	10.4225	10.3762	10.3913
PKLGRRHSMENME	P81274	GPSM2_394_406	G-protein-signaling modulator 2 (Mosaic protein LGN).		9.81632	10.0072	9.84524	10.2068	9.96889	10.4612	10.5453	10.5931	10.1244	10.431	10.3613	9.99829	10.233	10.2822	10.2187
KNGCRRGSSLGQI	Q01118	SCN7A_898_910	Sodium channel protein type 7 subunit alpha (Sodium channel proteintype VII subunit alpha) (Putative voltage-gated sodium channel subunitalpha Nax) (Sodium channel protein cardiac and skeletal muscle subunitalpha).		9.87767	9.93985	9.78526	10.1694	9.94304	10.3222	10.3519	10.3351	10.2666	10.319	10.2903	9.84262	10.0918	9.99845	10.0558
KMQLRRPSDQEVS	Q04864	REL_260_272	C-Rel proto-oncogene protein (C-Rel protein).		9.51233	9.79845	9.60644	9.87858	9.69895	10.1969	10.2321	10.3244	10.0064	10.1899	10.1627	9.59528	9.93815	9.9513	9.91185
SRIRTQSFSLQER	P29474	NOS3_1171_1183	Nitric oxide synthase, endothelial (EC=1.14.13.39) (Endothelial NOS) (eNOS) (EC-NOS) (NOS type III) (NOSIII) (Constitutive NOS) (cNOS).		9.54114	9.80446	9.50633	9.79663	9.66214	10.1572	10.1721	10.0414	10.0271	10.0994	10.0063	9.5759	9.93901	9.79897	9.83005
GFHPRRSSQGATQ	Q05469	LIPS_944_956	Hormone-sensitive lipase (HSL) (EC=3.1.1.79).		9.42113	9.61255	9.61536	9.88137	9.6326	10.0395	10.2035	10.1898	9.83869	10.0679	10.0213	9.64169	9.89274	9.84548	9.85029
EEGTFRSSIRRLS	O00168	PLM_76_88	Phospholemman precursor (FXYD domain-containing ion transportregulator 1).		8.86696	9.5141	9.1965	9.46588	9.26086	9.91156	10.0597	10.0262	9.69358	9.92275	9.87334	9.22913	9.74864	9.62973	9.62021
VRRLRRLTAREAA	P21817	RYR1_4317_4329	Ryanodine receptor 1 (Skeletal muscle-type ryanodine receptor) (RyR1)(RYR-1) (Skeletal muscle calcium release channel).		9.33975	9.45817	9.46043	9.59342	9.46294	9.77465	9.86817	9.96574	9.84025	9.8622	9.7418	9.46251	9.58467	9.53668	9.58142
VRMRHLSQEFGWL	P10275	ANDR_785_797	Androgen receptor (Dihydrotestosterone receptor) (Nuclear receptor subfamily 3 group C member 4).		8.8386	9.03422	8.88545	8.98399	8.93556	9.48267	9.58582	9.50826	9.57609	9.53821	9.36236	8.93198	9.19082	9.23174	9.17923
QCALCRRSTTDCG	P01233	CGHB_109_121	Choriogonadotropin subunit beta precursor (CG-beta) (Chorionicgonadotrophin chain beta).		9.48444	9.24027	9.0397	9.3332	9.2744	9.48794	9.4718	9.37599	9.57749	9.4783	9.4375	9.11767	9.28842	9.20429	9.26197
AAGERRKSQEAQV	Q93045	STMN2_90_102	Stathmin-2 (Protein SCG10) (Superior cervical ganglion-10 protein).		8.64917	9.05311	8.83353	8.84359	8.84485	9.43399	9.55802	9.50713	9.28796	9.44678	9.34433	8.82683	9.204	9.32157	9.17418
GGRERLASTNDKG	P03372	ESR1_160_172	Estrogen receptor (ER) (Estradiol receptor) (ER-alpha) (Nuclearreceptor subfamily 3 group A member 1).		8.88733	9.05925	9.02444	8.87581	8.96171	9.28746	9.35915	9.36078	9.33047	9.33447	9.23358	8.94483	9.2307	9.25092	9.16501
RSGSRRGSFDATG	P15924	DESP_2842_2854	Desmoplakin (DP) (250/210 kDa paraneoplastic pemphigus antigen).		8.3561	8.66526	8.55196	8.84478	8.60452	9.12307	9.35134	9.21421	9.07457	9.1908	9.11014	8.706	8.98515	8.95061	8.93798
EGLRSRSTRMSTVS	Q99661	KIF2C_105_118_S106G	Kinesin-like protein KIF2C (Mitotic centromere-associated kinesin)(MCAK) (Kinesin-like protein 6).		8.72827	9.01541	8.74224	8.69818	8.79603	9.12514	9.22356	9.10843	9.13822	9.14884	9.08894	8.77518	8.94945	9.05433	8.96698
RELRRMSDEFVDS	Q92934	BAD_112_124	Bcl2 antagonist of cell death (BAD) (Bcl-2-binding component 6) (Bcl-XL/Bcl-2-associated death promoter) (Bcl-2-like 8 protein).		8.03558	8.61484	8.30721	8.76043	8.42951	9.0042	9.27708	9.44428	8.60898	9.08364	8.99597	8.17694	8.79909	8.89412	8.71653
QQKIRKYTMRRLL	P04626	ERBB2_679_691	Receptor tyrosine-protein kinase erbB-2 precursor (EC 2.7.10.1)(p185erbB2) (C-erbB-2) (NEU proto-oncogene) (Tyrosine kinase-type cellsurface receptor HER2) (MLN 19) (CD340 antigen).		8.61451	8.80491	8.52618	8.51768	8.61582	9.01388	9.09152	8.9911	9.12493	9.05536	8.69469	8.6503	8.53099	8.43813	8.57853
LARRRKATQVGEK	P50552	VASP_271_283	Vasodilator-stimulated phosphoprotein (VASP).		8.37536	8.67563	8.51128	8.65723	8.55487	8.85438	8.92452	8.90092	8.73913	8.85474	8.80695	8.39708	8.6746	8.66623	8.63621
GQKFARKSTRRSI	P08567	PLEK_106_118	Pleckstrin (Platelet p47 protein).		8.30436	8.63615	8.34147	8.3778	8.41494	8.76899	8.78436	8.70505	8.82475	8.77079	8.57602	8.56144	8.45811	8.40635	8.50048
PDLKKSRSASTIS	P16389	KCNA2_442_454	Potassium voltage-gated channel subfamily A member 2 (Voltage-gatedpotassium channel subunit Kv1.2) (HBK5) (NGK1) (HUKIV).		7.57709	7.87236	7.6578	7.82978	7.73426	8.21557	8.3134	8.34872	8.00509	8.22069	8.09255	7.68155	7.98477	8.13777	7.97416
DSDLSRRSSSTMS	Q09470	KCNA1_438_450	Potassium voltage-gated channel subfamily A member 1 (Voltage-gatedpotassium channel subunit Kv1.1) (HUKI) (HBK1).		7.31777	7.60952	7.49575	7.68283	7.52647	8.08985	8.19972	8.10655	7.89375	8.07247	8.04621	7.49262	7.82254	7.95325	7.82866
QIRRRRPTPATLV	Q13522	PPR1A_28_40	Protein phosphatase 1 regulatory subunit 1A (Protein phosphataseinhibitor 1) (IPP-1) (I-1).		7.57399	7.78756	7.69673	7.64532	7.6759	7.99984	8.11694	8.05078	8.00909	8.04416	7.93957	7.72348	7.93737	7.94398	7.8861
RTRTDSYSAGQSV	P42345	FRAP_2443_2455	FKBP12-rapamycin complex-associated protein (FK506-binding protein 12-rapamycin complex-associated protein 1) (Rapamycin target protein) (RAPT1) (Mammalian target of rapamycin) (mTOR).		7.15831	7.59143	7.37164	7.67875	7.45003	7.97936	8.25416	8.1102	7.54433	7.97201	7.9717	7.33584	7.86279	7.8886	7.76473
MLRGRSLSVTSLG	P54840	GYS2_1_13	Glycogen [starch] synthase, liver (EC 2.4.1.11).		7.59243	7.81212	7.67833	7.52811	7.65275	7.76778	7.90238	7.68308	7.76766	7.78023	7.73417	7.74129	7.79865	7.80895	7.77077
QSKVPFRSRSPSE	P46095	GPR6_349_361	Sphingosine 1-phosphate receptor GPR6 (G-protein coupled receptor 6).		6.56297	7.02294	6.76937	6.96365	6.82974	7.40523	7.64511	7.44326	7.00384	7.37436	7.38004	6.74581	7.22643	7.27483	7.15678
AGERRKGTDVNVF	P04083	ANXA1_209_221	Annexin A1 (Annexin-1) (Annexin I) (Lipocortin I) (Calpactin II)(Chromobindin-9) (p35) (Phospholipase A2 inhibitory protein).		6.64084	6.9318	6.59138	6.84675	6.75269	7.40927	7.39092	7.29295	7.11882	7.30299	7.24677	6.6227	7.19688	7.18133	7.06192
GLGRSITSPTTLY	Q08999	RBL2_655_667	Retinoblastoma-like protein 2 (130 kDa retinoblastoma-associatedprotein) (p130) (PRB2) (RBR-2).		6.96072	7.29364	7.06683	6.91643	7.0594	7.29572	7.24547	7.17417	7.40685	7.28055	7.07302	6.98258	6.78824	6.95562	6.94987
PGKARKKSSCQLL	P61224	RAP1B_172_184	Ras-related protein Rap-1b precursor (GTP-binding protein smg p21B).		6.55164	6.71716	6.49928	6.67745	6.61138	7.14762	7.20148	6.98596	7.44082	7.19397	6.98048	6.60948	6.84526	6.68955	6.78119
EELRKARSNSTLS	P22001	KCNA3_461_473	Potassium voltage-gated channel subfamily A member 3 (Voltage-gatedpotassium channel subunit Kv1.3) (HPCN3) (HGK5) (HuKIII) (HLK3).		6.26304	6.63586	6.40214	6.61299	6.47851	7.1056	7.29532	7.30816	6.67534	7.0961	6.9249	6.42993	6.83402	7.12668	6.82888
MGPRRRSRKPEAPR	P49450	CENPA_1_14	Histone H3-like centromeric protein A (Centromere protein A) (CENP-A)(Centromere autoantigen A).		6.10141	6.30084	6.14967	5.99213	6.13602	6.58939	6.76451	6.73887	6.68759	6.69509	6.46872	6.25233	6.36277	6.45748	6.38533
GKKRKRSRKESYSI	P33778	H2B1B_ 27_40	Histone H2B type 1-B (H2B.f) (H2B/f) (H2B.1).		5.89124	5.9832	5.8228	5.91747	5.90368	6.49041	6.62641	6.30261	6.52844	6.48697	6.34376	5.98807	6.23317	6.18775	6.18819
RFARKGSLRQKNV	P05771	KPCB_19_31_A25S	Protein kinase C beta type (EC 2.7.11.13) (PKC-beta) (PKC-B).		5.98349	6.2135	5.97532	6.03567	6.05199	6.34921	6.48988	6.18866	6.40758	6.35883	6.31217	6.03752	6.0761	6.14075	6.14163
FRGRSRSAPPNLW	Q92934	BAD_93_105	Bcl2 antagonist of cell death (BAD) (Bcl-2-binding component 6) (Bcl-XL/Bcl-2-associated death promoter) (Bcl-2-like 8 protein).		6.06689	6.20677	6.14827	6.05813	6.12002	6.16563	6.20309	6.18574	6.25045	6.20123	6.0057	6.2585	6.32307	6.06957	6.16421
QSRPRSCTWPLQR	O43524	FOXO3_25_37	Forkhead box protein O3 (Forkhead in rhabdomyosarcoma-like 1) (AF6q21protein).		6.08371	6.08081	6.16665	5.95719	6.07209	6.14783	6.25039	6.06853	6.18484	6.1629	6.09447	6.18689	6.35128	6.13281	6.19136
KKKFRTPSFLKKS	P35612	ADDB_706_718	Beta-adducin (Erythrocyte adducin subunit beta)		5.28776	5.56941	5.52314	4.97676	5.33927	5.56428	5.77136	6.79233	5.72193	5.96247	5.46041	5.34479	5.61205	5.27302	5.42257
CYALCNRTFRKTF	P08912	ACM5_494_506	Muscarinic acetylcholine receptor M5.		5.70091	5.78851	5.85583	5.58449	5.73243	5.88266	5.93658	5.88618	6.03704	5.93562	5.62974	5.73295	5.76297	5.83436	5.74
CNRTFRKTFKMLL	P08912	ACM5_498_510	Muscarinic acetylcholine receptor M5.		5.32538	5.40432	5.36971	5.34436	5.36094	5.40634	5.46394	5.34689	5.50176	5.42973	5.33397	5.41825	5.3654	5.38323	5.37521
FTQRQNSAPARML	P30304	MPIP1_172_184	M-phase inducer phosphatase 1 (EC=3.1.3.48) (Dual specificity phosphatase Cdc25A).		5.42773	5.42509	5.37681	5.35312	5.39569	5.45289	5.30238	5.19556	5.39924	5.33752	5.48148	5.47571	5.45325	5.32703	5.43437
IRSRHSSYPAGTE	Q92934	BAD_69_81	Bcl2 antagonist of cell death (BAD) (Bcl-2-binding component 6) (Bcl-XL/Bcl-2-associated death promoter) (Bcl-2-like 8 protein).		4.95379	5.3858	4.95626	5.0807	5.09414	5.37706	5.30118	5.22758	5.2526	5.2896	5.16493	4.96864	5.23388	5.23573	5.1508
HFFKNIVTPRTPP	P02686	MBP_222_234	Myelin basic protein (MBP) (Myelin A1 protein) (Myelin membraneencephalitogenic protein).		5.33683	5.39317	5.41073	5.28116	5.35547	5.35226	5.39147	5.11627	5.24047	5.27512	5.4457	5.45345	5.50654	5.31069	5.42909
FACTYVGTPYYVP	P51956	NEK3_158_170	Serine/threonine-protein kinase Nek3 (EC 2.7.11.1) (NimA-relatedprotein kinase 3) (HSPK 36).		5.05217	5.19538	5.01158	4.95371	5.05321	5.16869	4.75892	5.35145	5.41398	5.17326	4.8475	5.00984	5.12519	5.06897	5.01288
LEDIKRLTPRFTL	P54289	CA2D1_494_506	Voltage-dependent calcium channel subunit alpha-2/delta-1 precursor(Voltage-gated calcium channel subunit alpha-2/delta-1) [Contains:Voltage-dependent calcium channel subunit alpha-2-1; Voltage-dependentcalcium channel subunit delta-1].		4.85377	5.12538	5.0585	4.89933	4.98424	5.15127	5.21321	4.98926	5.24205	5.14895	5.08718	4.97155	5.01384	5.10767	5.04506
NIYISPLKSPYKI	P06400	RB_803_815	Retinoblastoma-associated protein (PP110) (P105-RB) (RB).		5.08314	5.22665	5.06003	5.08035	5.11254	5.22937	5.16117	4.92691	5.13301	5.11261	5.00564	4.952	5.02169	5.25267	5.058
QLFRGFSFVATGL	Q15418	KS6A1_374_386	Ribosomal protein S6 kinase alpha-1 (S6K-alpha 1) (EC=2.7.11.1) (90 kDa ribosomal protein S6 kinase 1) (p90-RSK 1) (pp90RSK1) (p90S6K) (Ribosomal S6 kinase 1) (RSK-1) (MAP kinase-activated protein kinase 1a) (MAPKAPK1A).		4.97787	4.80662	4.87572	4.72296	4.84579	4.88534	5.13827	5.12443	5.13866	5.07168	4.81635	5.12826	4.93096	4.8339	4.92737
GSPNRAYTHQVVT	P50613	CDK7_163_175	Cell division protein kinase 7 (EC 2.7.11.22) (EC 2.7.11.23) (CDK-activating kinase) (CAK) (TFIIH basal transcription factor complexkinase subunit) (39 kDa protein kinase) (P39 Mo15) (STK1) (CAK1).		4.46759	5.01642	5.24284	4.23965	4.74163	5.04169	5.0935	4.6697	4.07936	4.72106	5.0263	4.96458	5.078	4.74018	4.95226
PPRPRTPGRPLSS	Q02750	MP2K1_287_299	Dual specificity mitogen-activated protein kinase kinase 1(EC 2.7.12.2) (MAP kinase kinase 1) (MAPKK 1) (ERK activator kinase 1)(MAPK/ERK kinase 1) (MEK1).		4.65597	4.67264	4.56386	4.25733	4.53745	4.66877	4.63848	4.71141	4.74269	4.69034	4.60319	5.01739	4.90382	4.77694	4.82534
ERSKTVTSFYNQS	O14874	BCKD_45_57	[3-methyl-2-oxobutanoate dehydrogenase [lipoamide]] kinase,mitochondrial precursor (EC 2.7.11.4) (Branched-chain alpha-ketoaciddehydrogenase kinase) (BCKDHKIN) (BCKD-kinase).		4.43825	4.24235	4.59055	4.289	4.39004	4.50135	4.84929	4.51621	4.88038	4.68681	4.50135	4.68775	4.54522	4.46772	4.55051
FAKTFVGTPYYMS	P51955	NEK2_172_184	Serine/threonine-protein kinase Nek2 (EC 2.7.11.1) (NimA-relatedprotein kinase 2) (NimA-like protein kinase 1) (HSPK 21).		4.66906	4.69288	4.53512	4.59203	4.62227	4.58591	4.49205	4.63563	4.80352	4.62928	4.46723	4.52469	4.60566	4.53044	4.53201
VKGRTWTLCGTPEYL	P22612	KAPCG_192_206	cAMP-dependent protein kinase catalytic subunit gamma (EC 2.7.11.11)(PKA C-gamma).		4.51954	4.62761	4.38692	4.35595	4.4725	4.59341	4.62293	4.44116	4.74153	4.59976	4.20357	4.1299	4.37422	4.25889	4.24165
RTKQTARKSTGGKAPR	Q71DI3	H32_3_18	Histone H3.2 (H3/m) (H3/o).		4.41978	4.07105	4.79325	4.05494	4.33476	4.28313	4.79389	4.48277	4.35906	4.47971	4.63702	4.30481	4.57513	4.73654	4.56337
FKKSFKLSGFSFK	P29966	MARCS_160_172	Myristoylated alanine-rich C-kinase substrate (MARCKS) (Protein kinaseC substrate, 80 kDa protein, light chain) (PKCSL) (80K-L protein).		4.59612	4.29775	4.77769	4.351	4.50564	4.47021	4.65722	4.48843	4.24894	4.4662	4.49407	4.92904	4.76686	4.7385	4.73212
AVIPINGSPRTPR	P06400	RB_242_254	Retinoblastoma-associated protein (PP110) (P105-RB) (RB).		4.5985	4.43161	4.42425	4.44549	4.47496	4.57483	4.60206	4.37395	4.26761	4.45461	4.35891	4.45456	4.74121	4.1337	4.4221

## Sheet: Figure 7-figure supplement 1B
BioNavigator Version	PamGrid Version	Protocol file name	Mon, 23 Oct 2023 16:08:26 GMT		QuantitationType
Sample name	V695	V700	V697	V699	V689	V690	V691	V692
2_Treatment	B_KO	B_KO	B_KO	B_KO	C_KO-LNP	C_KO-LNP	C_KO-LNP	C_KO-LNP
Name in PCA	KO-1	KO-2	KO-3	KO-4	KO-LNP-1	KO-LNP-2	KO-LNP-3	KO-LNP-4
	5.88266	6.03704	5.93658	5.88618	5.62974	5.73295	5.76297	5.83436
	5.40634	5.50176	5.46394	5.34689	5.33397	5.41825	5.3654	5.38323
	5.56428	5.72193	5.77136	6.79233	5.46041	5.34479	5.61205	5.27302
	12.044	12.07	12.0553	12.0094	11.9892	11.6501	11.8934	11.6827
	9.48267	9.57609	9.58582	9.50826	9.36236	8.93198	9.19082	9.23174
	7.40927	7.11882	7.39092	7.29295	7.24677	6.6227	7.19688	7.18133
	11.0875	10.9905	11.1648	11.1782	11.0482	10.6787	10.8469	10.7841
	9.0042	8.60898	9.27708	9.44428	8.99597	8.17694	8.79909	8.89412
	5.37706	5.2526	5.30118	5.22758	5.16493	4.96864	5.23388	5.23573
	6.16563	6.25045	6.20309	6.18574	6.0057	6.2585	6.32307	6.06957
	4.50135	4.88038	4.84929	4.51621	4.50135	4.68775	4.54522	4.46772
	5.15127	5.24205	5.21321	4.98926	5.08718	4.97155	5.01384	5.10767
	12.1448	12.1916	12.1481	12.104	12.0856	11.8112	12.0369	11.8803
	5.04169	4.07936	5.0935	4.6697	5.0263	4.96458	5.078	4.74018
	11.7257	11.6728	11.7952	11.8209	11.7199	11.5605	11.7123	11.7182
	6.58939	6.68759	6.76451	6.73887	6.46872	6.25233	6.36277	6.45748
	11.9367	11.8241	11.9809	12.0488	11.9282	11.6444	11.8133	11.8111
	13.3606	13.4072	13.2716	13.4295	13.3725	13.2786	13.342	13.2877
	9.48794	9.57749	9.4718	9.37599	9.4375	9.11767	9.28842	9.20429
	12.0457	11.9724	12.0694	12.0545	12.0268	11.8602	11.9688	11.8377
	11.6241	11.5423	11.6731	11.662	11.5982	11.154	11.504	11.3992
	9.12307	9.07457	9.35134	9.21421	9.11014	8.706	8.98515	8.95061
	10.5509	10.4842	10.5755	10.5958	10.4956	10.2708	10.4225	10.3762
	12.0791	12.0884	12.139	12.0695	12.0715	11.7448	11.9613	11.8558
	9.01388	9.12493	9.09152	8.9911	8.69469	8.6503	8.53099	8.43813
	9.28746	9.33047	9.35915	9.36078	9.23358	8.94483	9.2307	9.25092
	13.0364	13.0909	13.0248	13.0956	13.0285	12.8572	12.9747	12.9307
	6.14783	6.18484	6.25039	6.06853	6.09447	6.18689	6.35128	6.13281
	7.97936	7.54433	8.25416	8.1102	7.9717	7.33584	7.86279	7.8886
	12.4769	12.5367	12.5469	12.5137	12.4737	12.353	12.38	12.3804
	7.40523	7.00384	7.64511	7.44326	7.38004	6.74581	7.22643	7.27483
	10.4612	10.1244	10.5453	10.5931	10.3613	9.99829	10.233	10.2822
	12.2533	12.2531	12.2322	12.279	12.2533	12.0449	12.2064	12.0288
	7.76778	7.76766	7.90238	7.68308	7.73417	7.74129	7.79865	7.80895
	6.49041	6.52844	6.62641	6.30261	6.34376	5.98807	6.23317	6.18775
	4.28313	4.35906	4.79389	4.48277	4.63702	4.30481	4.57513	4.73654
	11.6596	11.6727	11.6563	11.6515	11.6182	11.3165	11.5333	11.4508
	12.5453	12.6058	12.53	12.5117	12.4988	12.283	12.4361	12.3726
	4.59341	4.74153	4.62293	4.44116	4.20357	4.1299	4.37422	4.25889
	8.08985	7.89375	8.19972	8.10655	8.04621	7.49262	7.82254	7.95325
	8.21557	8.00509	8.3134	8.34872	8.09255	7.68155	7.98477	8.13777
	7.1056	6.67534	7.29532	7.30816	6.9249	6.42993	6.83402	7.12668
	12.5881	12.6463	12.5939	12.5853	12.5748	12.4169	12.5225	12.4758
	9.12514	9.13822	9.22356	9.10843	9.08894	8.77518	8.94945	9.05433
	11.5982	11.5783	11.7084	11.6814	11.6096	11.2411	11.4864	11.4445
	6.34921	6.40758	6.48988	6.18866	6.31217	6.03752	6.0761	6.14075
	4.88534	5.13866	5.13827	5.12443	4.81635	5.12826	4.93096	4.8339
	10.0395	9.83869	10.2035	10.1898	10.0213	9.64169	9.89274	9.84548
	4.47021	4.24894	4.65722	4.48843	4.49407	4.92904	4.76686	4.7385
	5.35226	5.24047	5.39147	5.11627	5.4457	5.45345	5.50654	5.31069
	4.66877	4.74269	4.63848	4.71141	4.60319	5.01739	4.90382	4.77694
	5.45289	5.39924	5.30238	5.19556	5.48148	5.47571	5.45325	5.32703
	12.5404	12.4627	12.5562	12.6039	12.5216	12.2717	12.4181	12.4037
	11.2325	11.1345	11.2714	11.2989	11.1963	10.9802	11.0965	11.0374
	11.8037	11.7294	11.8155	11.8275	11.7514	11.5091	11.6523	11.5539
	4.58591	4.80352	4.49205	4.63563	4.46723	4.52469	4.60566	4.53044
	5.16869	5.41398	4.75892	5.35145	4.8475	5.00984	5.12519	5.06897
	11.0101	10.9791	11.0752	11.0235	10.9588	10.6489	10.8873	10.7325
	11.0361	11.0389	11.121	11.0019	10.8783	10.5871	10.901	10.7996
	10.1572	10.0271	10.1721	10.0414	10.0063	9.5759	9.93901	9.79897
	8.76899	8.82475	8.78436	8.70505	8.57602	8.56144	8.45811	8.40635
	9.91156	9.69358	10.0597	10.0262	9.87334	9.22913	9.74864	9.62973
	7.99984	8.00909	8.11694	8.05078	7.93957	7.72348	7.93737	7.94398
	11.4608	11.4549	11.5066	11.5747	11.4069	11.1381	11.337	11.4211
	11.8321	11.9565	11.8656	11.8693	11.8339	11.6319	11.736	11.5998
	7.14762	7.44082	7.20148	6.98596	6.98048	6.60948	6.84526	6.68955
	7.29572	7.40685	7.24547	7.17417	7.07302	6.98258	6.78824	6.95562
	4.57483	4.26761	4.60206	4.37395	4.35891	4.45456	4.74121	4.1337
	5.22937	5.13301	5.16117	4.92691	5.00564	4.952	5.02169	5.25267
	10.1969	10.0064	10.2321	10.3244	10.1627	9.59528	9.93815	9.9513
	11.1708	11.1781	11.1814	11.2063	11.1323	10.8956	11.0272	10.8952
	9.77465	9.84025	9.86817	9.96574	9.7418	9.46251	9.58467	9.53668
	10.3222	10.2666	10.3519	10.3351	10.2903	9.84262	10.0918	9.99845
	12.2987	12.405	12.2793	12.2872	12.2251	12.0317	12.2132	12.1129
	9.43399	9.28796	9.55802	9.50713	9.34433	8.82683	9.204	9.32157
	12.7109	12.7109	12.6505	12.714	12.7007	12.5219	12.585	12.5256
	12.3699	12.274	12.3149	12.4398	12.3194	12.1379	12.1988	12.1031
	11.8925	11.9653	11.9304	12.0003	11.8289	11.4903	11.8094	11.784
	8.85438	8.73913	8.92452	8.90092	8.80695	8.39708	8.6746	8.66623
	11.5108	11.4663	11.5177	11.5411	11.4697	11.2152	11.3909	11.291

## Sheet: Figure 7-figure supplement 1C
Kinase Uniprot ID	Kinase Name	Mean Specificity Score	Mean Significance Score	Mean Final Score	Median Final score	Mean Kinase Statistic	Median Kinase Statistic	SD Kinase Statitistic	Mean peptide set size
P17612	PKA[alpha]	2.49828	1.53441	4.0327	4.14267	-1.21612	-1.22157	0.0165879	46.3333
Q13237	PKG2	2.09341	1.53441	3.62782	3.74473	-1.27942	-1.27835	0.0226391	32.6667
Q05655	PKC[delta]	1.62982	1.53441	3.16423	3.37675	-1.325	-1.35796	0.0495979	19.7778
Q13976	PKG1	1.71541	1.53441	3.24982	3.02872	-1.21911	-1.22332	0.0134236	35.4444
P17252	PKC[alpha]	1.37845	1.53441	2.91286	2.95078	-1.25656	-1.23654	0.0289493	24.3333
Q04759	PKC[theta]	0.956261	1.53441	2.49067	2.51942	-1.22723	-1.22496	0.0193905	19.3333
P11309	Pim1	0.827403	1.53441	2.36182	2.34333	-1.09315	-1.09116	0.00307037	51.8889
Q9P1W9	Pim2	0.717354	1.53441	2.25177	2.23359	-1.11121	-1.12515	0.0489634	32.4444
P51817	PRKX	0.791735	1.41463	2.20636	2.20817	-1.16481	-1.16074	0.0598711	27.3333
Q9UBS0	p70S6K[beta]	0.627483	1.50483	2.13231	2.19873	-1.14694	-1.11499	0.0787738	22.2222
P05129	PKC[gamma]	0.606248	1.53441	2.14066	2.18363	-1.1787	-1.18057	0.016809	12.1111
P05771	PKC[beta]	0.65403	1.53441	2.18844	2.16545	-1.25029	-1.25029	0	7
Q9HBY8	SGK2	0.650736	1.4041	2.05484	2.10127	-1.18465	-1.17895	0.0312943	13.1111
O14965	AurA/Aur2	0.514816	1.53441	2.04923	2.01882	-1.2203	-1.21478	0.016542	4.11111
P31749	Akt1/PKB[alpha]	0.464839	1.53441	1.99925	1.9765	-1.0855	-1.09098	0.0142045	24.4444
Q86V86	Pim3	0.519959	1.53441	2.05437	1.97078	-1.06551	-1.05517	0.0264163	48
Q05513	PKC[zeta]	0.43121	1.53441	1.96562	1.96625	-1.12766	-1.11851	0.0181747	7.33333
Q16566	CaMK4	0.853295	1.37809	2.23139	1.96465	-1.25095	-1.22287	0.0709953	11.7778
P68400	CK2[alpha]1	0.386076	1.53441	1.92049	1.90546	-1.13936	-1.13936	0	3
P24723	PKC[eta]	0.421546	1.53441	1.95596	1.89757	-1.09581	-1.0973	0.0379687	12.4444
P49674	CK1[epsilon]	0.669586	1.19382	1.86341	1.86341	-1.34721	-1.34721	NA	3
P41743	PKC[iota]	0.352823	1.53441	1.88724	1.86239	-1.06541	-1.08227	0.0314845	11.8889
P31751	Akt2/PKB[beta]	0.350249	1.48473	1.83498	1.85078	-1.05136	-1.05365	0.013507	22
Q96GD4	AurB/Aur1	0.313845	1.44137	1.75522	1.84894	-1.06532	-1.07614	0.0433794	4.11111
Q02156	PKC[epsilon]	0.31092	1.53441	1.84533	1.83851	-1.03731	-1.0384	0.0195157	17.6667
P11802	CDK4	0.276046	1.53441	1.81046	1.83351	-1.02064	-1.03333	0.038091	4.22222
Q00535	CDK5	0.289833	1.53441	1.82425	1.83351	-1.03333	-1.03333	0	4
Q00534	CDK6	0.274325	1.50096	1.77529	1.81873	-1.01296	-1.03333	0.0611347	3.88889
O75116	ROCK2	0.248155	1.40213	1.65029	1.81361	-0.89629	-0.805038	0.238748	4.8
Q15349	RSK1/p90RSK	0.243454	1.53441	1.77787	1.79697	-0.978568	-0.978568	0	6
Q8NI60	ADCK3	0.296593	1.53441	1.83101	1.77469	-1.02472	-0.936415	0.166375	8.11111
Q15131	CDK10	0.393261	1.43246	1.82572	1.77222	-1.12042	-1.1275	0.100274	5
Q15139	PKD1	0.231346	1.53441	1.76576	1.76045	-0.96908	-0.96908	0	6
Q9UIK4	DAPK2	0.441388	1.25975	1.70114	1.72335	-1.2052	-1.2052	0	3
O43930	PRKY	0.436542	1.31672	1.75326	1.72106	-1.12978	-1.13585	0.0517677	9
Q15418	RSK3	0.171107	1.53441	1.70552	1.71906	-0.918895	-0.918895	0	9
P51812	RSK2	0.166741	1.53441	1.70115	1.71525	-0.888272	-0.888272	0	7
Q16644	MAPKAPK3	0.153988	1.53441	1.6884	1.70019	-0.940385	-0.96949	0.0931449	28
O75582	MSK1	0.127466	1.53441	1.66188	1.6801	-0.843638	-0.843638	0	7
P23443	p70S6K	0.203535	1.51818	1.72171	1.67778	-0.96453	-0.920385	0.0873444	13.6667
O60285	NuaK1	0.12804	1.52098	1.64902	1.67662	-0.749762	-0.749762	0	3
P50750	CDK9	0.139228	1.53441	1.67364	1.65193	-0.82226	-0.75781	0.0966753	5.66667
O96017	CHK2	0.109201	1.53441	1.64361	1.62812	-0.886888	-0.874745	0.0861977	18.7778
Q00526	CDK3	0.108619	1.53441	1.64303	1.6265	-0.814308	-0.81813	0.0945668	7.55556
Q13153	PAK1	0.0582126	1.53441	1.59263	1.60639	-0.664125	-0.664125	0	6
O94921	PFTAIRE1	0.474702	1.11739	1.5921	1.59929	-1.20889	-1.20889	0	3
P49137	MAPKAPK2	0.0867245	1.53441	1.62114	1.59346	-0.905154	-0.895999	0.0485344	24.1111
P42345	mTOR/FRAP	0.157369	1.42222	1.57959	1.59244	-0.85736	-0.85589	0.0655553	4.88889
P16066	ANP[alpha]	0.0286172	1.53441	1.56303	1.57148	-0.796544	-0.780632	0.0343047	19.8889
Q96Q40	PFTAIRE2	0.301924	1.21441	1.51634	1.55664	-1.0396	-1.05122	0.0193683	5.55556
P28482	ERK2	0.0244345	1.34367	1.36811	1.55371	-0.586014	-0.660683	0.139991	9.55556
Q14164	IKK[epsilon]	0.281782	1.25897	1.54075	1.54006	-1.02607	-1.00933	0.0332242	4.77778
Q13131	AMPK[alpha]1	0.266096	1.27521	1.5413	1.52276	-1.01149	-1.05253	0.0575051	10
P04049	RAF1	0.104029	1.33294	1.43696	1.50585	-0.751729	-0.781682	0.0760365	5.33333
P45984	JNK2	0.112114	1.43853	1.55065	1.5002	-0.849874	-0.805555	0.0742715	10.3333
Q9UKE5	TNIK/ZC2	0.237048	1.23876	1.47581	1.48032	-0.984411	-0.984411	0	3
O15111	IKK[alpha]	0.276288	1.20583	1.48212	1.47361	-1.0277	-1.01387	0.0207358	3.66667
O95819	HGK/ZC1	0.23039	1.20326	1.43365	1.46324	-0.968949	-0.969398	0.00110117	3.83333
Q92772	CDKL2	0.264401	1.18046	1.44486	1.44486	-1.04143	-1.04143	NA	3
P24941	CDK2	0.0229811	1.33714	1.36012	1.43604	-0.570815	-0.60857	0.0949942	9.11111
Q13464	ROCK1	0.184142	1.31903	1.50317	1.4351	-0.885583	-0.837068	0.0664324	4.4
Q00532	CDKL1	0.0810111	1.40969	1.4907	1.4101	-0.708856	-0.649725	0.0973841	5.4
Q9BWU1	CDK11	0.164343	1.24154	1.40588	1.40796	-0.849931	-0.849931	0	3
P48729	CK1[alpha]	0.118289	1.22639	1.34468	1.38565	-0.839015	-0.854122	0.0558743	8
Q15759	p38[beta]	0.167999	1.232	1.4	1.37214	-0.867034	-0.759436	0.186365	3.66667
Q13535	ATR	0.113596	1.25897	1.37257	1.36267	-0.807017	-0.814386	0.0221073	5.88889
P15056	BRAF	0.0983684	1.27633	1.3747	1.34333	-0.658969	-0.641388	0.0527415	3.11111
O15264	p38[delta]	0.0225181	1.16431	1.18682	1.34287	-0.628246	-0.639954	0.0732031	10
P10398	ARAF	0.0918239	1.24932	1.34115	1.33483	-0.641388	-0.641388	0	3
O14920	IKK[beta]	0.0718101	0.915015	0.986825	1.29379	-0.586506	-0.665687	0.121428	3.66667
Q00537	PCTAIRE2	0.136677	1.1549	1.29158	1.29158	-0.768775	-0.768775	NA	3
P50613	CDK7	0.0244531	1.35485	1.37931	1.28333	-0.66323	-0.624774	0.0584233	10.8889
Q9UHD2	TBK1	0.1913	1.08375	1.27505	1.26664	-0.927073	-0.930897	0.00523675	3.6
P45983	JNK1	0.00495604	1.24057	1.24552	1.25882	-0.618092	-0.6176	0.0170898	14.5556
P53779	JNK3	0.00514904	1.22001	1.22516	1.25882	-0.614547	-0.6176	0.0202265	14.2222
O43293	DAPK3	0.119186	1.08619	1.20537	1.20537	-0.699123	-0.699123	NA	3
Q16539	MAPK14	0.0624364	1.2	1.26244	1.12531	-0.708125	-0.618109	0.1183	8.77778
P49841	GSK3[beta]	0.110525	0.970624	1.08115	1.07212	-0.710642	-0.710642	0	3
O14757	CHK1	0.0217314	0.888211	0.909943	0.955084	-0.473502	-0.496268	0.111551	6
P27361	ERK1	0.0268274	1.14929	1.17611	0.934047	-0.590841	-0.499614	0.150365	8.77778
P06493	CDC2/CDK1	0.0241081	1.02832	1.05243	0.911821	-0.561468	-0.523781	0.080615	8.55556
O75676	MSK2	0.0875441	0.707304	0.794848	0.794384	-0.623185	-0.623185	0	3
Q9Y6S9	RSKL2	0.037543	0.690657	0.7282	0.709665	-0.43748	-0.43748	0.153642	3.5
Q8IWB6	SgK307	0.0244204	0.528755	0.553175	0.551733	-0.302	-0.302	0	3
Q13164	ERK5	0.00575065	0.61328	0.619031	0.485915	-0.313766	-0.311562	0.166742	7.11111
O76039	CDKL5	0.0321549	0.508517	0.540672	0.442965	-0.419679	-0.383288	0.192789	4.28571
Q8TD08	ERK7	0.0259491	0.393619	0.419568	0.419568	-0.330171	-0.330171	NA	3
P53778	p38[gamma]	0.00135638	0.346334	0.34769	0.37146	-0.140268	-0.146335	0.125193	6.55556
Q16512	PKN1/PRK1	0.00960052	0.277655	0.287256	0.0517984	-0.126619	0.0701388	0.254878	4
