# Supplementary material for: MicroRNA-26b protects against MASH development in mice and can be efficiently targeted with lipid nanoparticles
Source: eLife. 2025 Apr 22;13:RP97165. doi: 10.7554/eLife.97165 (PMC12014130; doi:10.7554/eLife.97165)
Supplement: Figure 7—source data 1. [file elife-97165-fig7-data1.xlsx]

## Sheet: Figure 7A
BioNavigator Version	6.3.67.0	QCLog_CmbCor	STK Basis Processing TemplateDate		PamGrid Version	Protocol file name	Mon, 23 Oct 2023 16:08:26 GMT		QuantitationType
Sample name	V682	V686	V684	V685	V695	V700	V697	V699	V689	V690	V691	V692
2_Treatment	A_WT	A_WT	A_WT	A_WT	B_KO	B_KO	B_KO	B_KO	C_KO-LNP	C_KO-LNP	C_KO-LNP	C_KO-LNP
Name in PCA	WT-1	WT-2	WT-3	WT-4	KO-1	KO-2	KO-3	KO-4	KO-LNP-1	KO-LNP-2	KO-LNP-3	KO-LNP-4
	5.70091	5.58449	5.78851	5.85583	5.88266	6.03704	5.93658	5.88618	5.62974	5.73295	5.76297	5.83436
	5.32538	5.34436	5.40432	5.36971	5.40634	5.50176	5.46394	5.34689	5.33397	5.41825	5.3654	5.38323
	5.28776	4.97676	5.56941	5.52314	5.56428	5.72193	5.77136	6.79233	5.46041	5.34479	5.61205	5.27302
	11.7479	11.8861	11.6969	11.5473	12.044	12.07	12.0553	12.0094	11.9892	11.6501	11.8934	11.6827
	8.8386	8.98399	9.03422	8.88545	9.48267	9.57609	9.58582	9.50826	9.36236	8.93198	9.19082	9.23174
	6.64084	6.84675	6.9318	6.59138	7.40927	7.11882	7.39092	7.29295	7.24677	6.6227	7.19688	7.18133
	10.5141	10.853	10.6504	10.5676	11.0875	10.9905	11.1648	11.1782	11.0482	10.6787	10.8469	10.7841
	8.03558	8.76043	8.61484	8.30721	9.0042	8.60898	9.27708	9.44428	8.99597	8.17694	8.79909	8.89412
	4.95379	5.0807	5.3858	4.95626	5.37706	5.2526	5.30118	5.22758	5.16493	4.96864	5.23388	5.23573
	6.06689	6.05813	6.20677	6.14827	6.16563	6.25045	6.20309	6.18574	6.0057	6.2585	6.32307	6.06957
	4.43825	4.289	4.24235	4.59055	4.50135	4.88038	4.84929	4.51621	4.50135	4.68775	4.54522	4.46772
	4.85377	4.89933	5.12538	5.0585	5.15127	5.24205	5.21321	4.98926	5.08718	4.97155	5.01384	5.10767
	11.8741	11.9832	11.9046	11.738	12.1448	12.1916	12.1481	12.104	12.0856	11.8112	12.0369	11.8803
	4.46759	4.23965	5.01642	5.24284	5.04169	4.07936	5.0935	4.6697	5.0263	4.96458	5.078	4.74018
	11.5083	11.6357	11.6099	11.539	11.7257	11.6728	11.7952	11.8209	11.7199	11.5605	11.7123	11.7182
	6.10141	5.99213	6.30084	6.14967	6.58939	6.68759	6.76451	6.73887	6.46872	6.25233	6.36277	6.45748
	11.5064	11.7958	11.5982	11.5217	11.9367	11.8241	11.9809	12.0488	11.9282	11.6444	11.8133	11.8111
	13.1264	13.2625	13.2254	13.1639	13.3606	13.4072	13.2716	13.4295	13.3725	13.2786	13.342	13.2877
	9.48444	9.3332	9.24027	9.0397	9.48794	9.57749	9.4718	9.37599	9.4375	9.11767	9.28842	9.20429
	11.5961	11.9574	11.8228	11.7294	12.0457	11.9724	12.0694	12.0545	12.0268	11.8602	11.9688	11.8377
	11.1226	11.3215	11.3458	11.1342	11.6241	11.5423	11.6731	11.662	11.5982	11.154	11.504	11.3992
	8.3561	8.84478	8.66526	8.55196	9.12307	9.07457	9.35134	9.21421	9.11014	8.706	8.98515	8.95061
	10.0949	10.3742	10.3312	10.2242	10.5509	10.4842	10.5755	10.5958	10.4956	10.2708	10.4225	10.3762
	11.6621	11.8895	11.7797	11.6243	12.0791	12.0884	12.139	12.0695	12.0715	11.7448	11.9613	11.8558
	8.61451	8.51768	8.80491	8.52618	9.01388	9.12493	9.09152	8.9911	8.69469	8.6503	8.53099	8.43813
	8.88733	8.87581	9.05925	9.02444	9.28746	9.33047	9.35915	9.36078	9.23358	8.94483	9.2307	9.25092
	12.7314	12.8853	12.8533	12.782	13.0364	13.0909	13.0248	13.0956	13.0285	12.8572	12.9747	12.9307
	6.08371	5.95719	6.08081	6.16665	6.14783	6.18484	6.25039	6.06853	6.09447	6.18689	6.35128	6.13281
	7.15831	7.67875	7.59143	7.37164	7.97936	7.54433	8.25416	8.1102	7.9717	7.33584	7.86279	7.8886
	12.2604	12.3382	12.2888	12.2299	12.4769	12.5367	12.5469	12.5137	12.4737	12.353	12.38	12.3804
	6.56297	6.96365	7.02294	6.76937	7.40523	7.00384	7.64511	7.44326	7.38004	6.74581	7.22643	7.27483
	9.81632	10.2068	10.0072	9.84524	10.4612	10.1244	10.5453	10.5931	10.3613	9.99829	10.233	10.2822
	12.0297	12.1874	11.9833	11.94	12.2533	12.2531	12.2322	12.279	12.2533	12.0449	12.2064	12.0288
	7.59243	7.52811	7.81212	7.67833	7.76778	7.76766	7.90238	7.68308	7.73417	7.74129	7.79865	7.80895
	5.89124	5.91747	5.9832	5.8228	6.49041	6.52844	6.62641	6.30261	6.34376	5.98807	6.23317	6.18775
	4.41978	4.05494	4.07105	4.79325	4.28313	4.35906	4.79389	4.48277	4.63702	4.30481	4.57513	4.73654
	11.3641	11.4619	11.3079	11.2736	11.6596	11.6727	11.6563	11.6515	11.6182	11.3165	11.5333	11.4508
	12.3819	12.4291	12.3862	12.2524	12.5453	12.6058	12.53	12.5117	12.4988	12.283	12.4361	12.3726
	4.51954	4.35595	4.62761	4.38692	4.59341	4.74153	4.62293	4.44116	4.20357	4.1299	4.37422	4.25889
	7.31777	7.68283	7.60952	7.49575	8.08985	7.89375	8.19972	8.10655	8.04621	7.49262	7.82254	7.95325
	7.57709	7.82978	7.87236	7.6578	8.21557	8.00509	8.3134	8.34872	8.09255	7.68155	7.98477	8.13777
	6.26304	6.61299	6.63586	6.40214	7.1056	6.67534	7.29532	7.30816	6.9249	6.42993	6.83402	7.12668
	12.3709	12.4457	12.4308	12.3465	12.5881	12.6463	12.5939	12.5853	12.5748	12.4169	12.5225	12.4758
	8.72827	8.69818	9.01541	8.74224	9.12514	9.13822	9.22356	9.10843	9.08894	8.77518	8.94945	9.05433
	11.1719	11.4077	11.257	11.1585	11.5982	11.5783	11.7084	11.6814	11.6096	11.2411	11.4864	11.4445
	5.98349	6.03567	6.2135	5.97532	6.34921	6.40758	6.48988	6.18866	6.31217	6.03752	6.0761	6.14075
	4.97787	4.72296	4.80662	4.87572	4.88534	5.13866	5.13827	5.12443	4.81635	5.12826	4.93096	4.8339
	9.42113	9.88137	9.61255	9.61536	10.0395	9.83869	10.2035	10.1898	10.0213	9.64169	9.89274	9.84548
	4.59612	4.351	4.29775	4.77769	4.47021	4.24894	4.65722	4.48843	4.49407	4.92904	4.76686	4.7385
	5.33683	5.28116	5.39317	5.41073	5.35226	5.24047	5.39147	5.11627	5.4457	5.45345	5.50654	5.31069
	4.65597	4.25733	4.67264	4.56386	4.66877	4.74269	4.63848	4.71141	4.60319	5.01739	4.90382	4.77694
	5.42773	5.35312	5.42509	5.37681	5.45289	5.39924	5.30238	5.19556	5.48148	5.47571	5.45325	5.32703
	12.1348	12.3536	12.2506	12.2216	12.5404	12.4627	12.5562	12.6039	12.5216	12.2717	12.4181	12.4037
	10.7809	11.0691	10.9566	10.9126	11.2325	11.1345	11.2714	11.2989	11.1963	10.9802	11.0965	11.0374
	11.3008	11.6026	11.4686	11.4067	11.8037	11.7294	11.8155	11.8275	11.7514	11.5091	11.6523	11.5539
	4.66906	4.59203	4.69288	4.53512	4.58591	4.80352	4.49205	4.63563	4.46723	4.52469	4.60566	4.53044
	5.05217	4.95371	5.19538	5.01158	5.16869	5.41398	4.75892	5.35145	4.8475	5.00984	5.12519	5.06897
	10.4738	10.7823	10.6592	10.5232	11.0101	10.9791	11.0752	11.0235	10.9588	10.6489	10.8873	10.7325
	10.4618	10.5221	10.66	10.4551	11.0361	11.0389	11.121	11.0019	10.8783	10.5871	10.901	10.7996
	9.54114	9.79663	9.80446	9.50633	10.1572	10.0271	10.1721	10.0414	10.0063	9.5759	9.93901	9.79897
	8.30436	8.3778	8.63615	8.34147	8.76899	8.82475	8.78436	8.70505	8.57602	8.56144	8.45811	8.40635
	8.86696	9.46588	9.5141	9.1965	9.91156	9.69358	10.0597	10.0262	9.87334	9.22913	9.74864	9.62973
	7.57399	7.64532	7.78756	7.69673	7.99984	8.00909	8.11694	8.05078	7.93957	7.72348	7.93737	7.94398
	10.9833	11.1075	11.1809	11.0902	11.4608	11.4549	11.5066	11.5747	11.4069	11.1381	11.337	11.4211
	11.5608	11.6971	11.6127	11.5067	11.8321	11.9565	11.8656	11.8693	11.8339	11.6319	11.736	11.5998
	6.55164	6.67745	6.71716	6.49928	7.14762	7.44082	7.20148	6.98596	6.98048	6.60948	6.84526	6.68955
	6.96072	6.91643	7.29364	7.06683	7.29572	7.40685	7.24547	7.17417	7.07302	6.98258	6.78824	6.95562
	4.5985	4.44549	4.43161	4.42425	4.57483	4.26761	4.60206	4.37395	4.35891	4.45456	4.74121	4.1337
	5.08314	5.08035	5.22665	5.06003	5.22937	5.13301	5.16117	4.92691	5.00564	4.952	5.02169	5.25267
	9.51233	9.87858	9.79845	9.60644	10.1969	10.0064	10.2321	10.3244	10.1627	9.59528	9.93815	9.9513
	10.846	11.0639	10.8453	10.7806	11.1708	11.1781	11.1814	11.2063	11.1323	10.8956	11.0272	10.8952
	9.33975	9.59342	9.45817	9.46043	9.77465	9.84025	9.86817	9.96574	9.7418	9.46251	9.58467	9.53668
	9.87767	10.1694	9.93985	9.78526	10.3222	10.2666	10.3519	10.3351	10.2903	9.84262	10.0918	9.99845
	12.0608	12.105	12.0791	11.9701	12.2987	12.405	12.2793	12.2872	12.2251	12.0317	12.2132	12.1129
	8.64917	8.84359	9.05311	8.83353	9.43399	9.28796	9.55802	9.50713	9.34433	8.82683	9.204	9.32157
	12.4773	12.5751	12.5034	12.4151	12.7109	12.7109	12.6505	12.714	12.7007	12.5219	12.585	12.5256
	12.0056	12.3252	12.0163	11.938	12.3699	12.274	12.3149	12.4398	12.3194	12.1379	12.1988	12.1031
	11.3924	11.5142	11.6371	11.4568	11.8925	11.9653	11.9304	12.0003	11.8289	11.4903	11.8094	11.784
	8.37536	8.65723	8.67563	8.51128	8.85438	8.73913	8.92452	8.90092	8.80695	8.39708	8.6746	8.66623
	11.1199	11.3974	11.2563	11.162	11.5108	11.4663	11.5177	11.5411	11.4697	11.2152	11.3909	11.291

## Sheet: Figure 7B
ID	UniprotAccession	Sequence	2G_KO-LNP vs. KO::TTest_delta_C_KO-LNP	2G_KO-LNP vs. KO::TTest_p_C_KO-LNP
ERBB2_679_691	P04626	QQKIRKYTMRRLL	-0.476833	0.000362963
PLEK_106_118	P08567	GQKFARKSTRRSI	-0.270311	0.00132288
CENPA_1_14	P49450	MGPRRRSRKPEAPR	-0.309764	0.00276243
KAPCG_192_206	P22612	VKGRTWTLCGTPEYL	-0.358113	0.00431908
RBL2_655_667	Q08999	GLGRSITSPTTLY	-0.330687	0.00511807
GBRB2_427_439	P47870	SRLRRRASQLKIT	-0.121799	0.00733257
RYR1_4317_4329	P21817	VRRLRRLTAREAA	-0.280784	0.00757665
ANDR_785_797	P10275	VRMRHLSQEFGWL	-0.35898	0.00862687
ACM5_494_506	P08912	CYALCNRTFRKTF	-0.195614	0.012603
NMDZ1_890_902	Q05586	SFKRRRSSKDTST	-0.257991	0.014475
RS6_228_240	P62753	IAKRRRLSSLRAS	-0.19654	0.0145869
RAP1B_172_184	P61224	PGKARKKSSCQLL	-0.412779	0.0164723
STK6_283_295	O14965	SSRRTTLCGTLDY	-0.17182	0.01939
NCF1_321_333	P14598	QDAYRRNSVRFLQ	-0.177324	0.0227377
PTN12_32_44	Q05209	FMRLRRLSTKYRT	-0.180433	0.0229085
E1A_ADE05_212_224	P03255	AILRRPTSPVSRE	-0.16029	0.0231922
KAP3_107_119	P31323	NRFTRRASVCAEA	-0.150569	0.024368
H2B1B_ 27_40	P33778	GKKRKRSRKESYSI	-0.298782	0.024955
NFKB1_330_342	P19838	FVQLRRKSDLETS	-0.215091	0.0264302
ADRB2_338_350	P07550	ELLCLRRSSLKAY	-0.240833	0.0272725
KCNA6_504_516	P17658	ANRERRPSYLPTP	-0.105905	0.0275602
CAC1C_1974_1986	Q13936	ASLGRRASFHLEC	-0.193628	0.0276863
VTNC_390_402	P04004	NQNSRRPSRATWL	-0.167289	0.0278016
F263_454_466	Q16875	NPLMRRNSVTPLA	-0.114136	0.0306145
KAP2_92_104	P13861	SRFNRRVSVCAET	-0.180336	0.0311371
SCN7A_898_910	Q01118	KNGCRRGSSLGQI	-0.263185	0.0328498
CGHB_109_121	P01233	QCALCRRSTTDCG	-0.216332	0.0348026
TY3H_65_77	P07101	FIGRRQSLIEDAR	-0.159821	0.0363635
NCF1_296_308	P14598	RGAPPRRSSIRNA	-0.156744	0.0365408
VASP_150_162	P50552	EHIERRVSNAGGP	-0.218957	0.0387819
NOS3_1171_1183	P29474	SRIRTQSFSLQER	-0.26939	0.0389532
PPR1A_28_40	Q13522	QIRRRRPTPATLV	-0.158057	0.0398175
EPB42_241_253	P16452	LLNKRRGSVPILR	-0.185631	0.0413797
TOP2A_1463_1475	P11388	RRKRKPSTSDDSD	-0.113291	0.0435743
KPCB_19_31_A25S	P05771	RFARKGSLRQKNV	-0.217197	0.0484817
PTK6_436_448	Q13882	ALRERLSSFTSYE	-0.173461	0.0498783
DESP_2842_2854	P15924	RSGSRRGSFDATG	-0.252821	0.0513969
KIF2C_105_118_S106G	Q99661	EGLRSRSTRMSTVS	-0.181861	0.0515108
KPB1_1011_1023	P46020	QVEFRRLSISAES	-0.196106	0.055702
MYPC3_268_280	Q14896	LSAFRRTSLAGGG	-0.136993	0.059476
VASP_271_283	P50552	LARRRKATQVGEK	-0.218523	0.061775
CREB1_126_138	P16220	EILSRRPSYRKIL	-0.112149	0.0649842
ESR1_160_172	P03372	GGRERLASTNDKG	-0.16946	0.0659408
MARCS_160_172	P29966	FKKSFKLSGFSFK	0.265916	0.0734826
CSF1R_701_713	P07333	NIHLEKKYVRRDS	-0.211553	0.0791288
GRIK2_708_720	Q13002	FMSSRRQSVLVKS	-0.121037	0.0796221
MBP_222_234	P02686	HFFKNIVTPRTPP	0.153976	0.0846288
REL_260_272	Q04864	KMQLRRPSDQEVS	-0.27809	0.0852125
STMN2_90_102	Q93045	AAGERRKSQEAQV	-0.272596	0.0870697
CFTR_730_742	P13569	EPLERRLSLVPDS	-0.148337	0.0955908
BAD_69_81	Q92934	IRSRHSSYPAGTE	-0.138808	0.0983773
KCNA2_442_454	P16389	PDLKKSRSASTIS	-0.246531	0.103386
LIPS_944_956	Q05469	GFHPRRSSQGATQ	-0.217582	0.109543
PLM_76_88	O00168	EEGTFRSSIRRLS	-0.302538	0.111409
ADDB_706_718	P35612	KKKFRTPSFLKKS	-0.539905	0.111689
KCNA1_438_450	Q09470	DSDLSRRSSSTMS	-0.24381	0.125564
GPSM2_394_406	P81274	PKLGRRHSMENME	-0.212322	0.157417
CA2D1_494_506	P54289	LEDIKRLTPRFTL	-0.103888	0.159961
KS6A1_374_386	Q15418	QLFRGFSFVATGL	-0.14431	0.178796
ANXA1_209_221	P04083	AGERRKGTDVNVF	-0.241071	0.185889
CDN1A_139_151	P38936	GRKRRQTSMTDFY	-0.0759397	0.191297
MP2K1_287_299	Q02750	PPRPRTPGRPLSS	0.134997	0.191717
MPIP1_172_184	P30304	FTQRQNSAPARML	0.0968503	0.200057
ACM5_498_510	P08912	CNRTFRKTFKMLL	-0.0545174	0.203101
BAD_112_124	Q92934	RELRRMSDEFVDS	-0.367106	0.206562
NEK2_172_184	P51955	FAKTFVGTPYYMS	-0.0972723	0.220723
KCNA3_461_473	P22001	EELRKARSNSTLS	-0.267221	0.246142
BCKD_45_57	O14874	ERSKTVTSFYNQS	-0.136299	0.276338
CFTR_761_773	P13569	LQARRRQSVLNLM	-0.04705	0.300108
GPR6_349_361	P46095	QSKVPFRSRSPSE	-0.21758	0.305989
NEK3_158_170	P51956	FACTYVGTPYYVP	-0.160383	0.352894
FRAP_2443_2455	P42345	RTRTDSYSAGQSV	-0.20728	0.363504
CDK7_163_175	P50613	GSPNRAYTHQVVT	0.231201	0.382396
RB_803_815	P06400	NIYISPLKSPYKI	-0.0546155	0.578969
H32_3_18	Q71DI3	RTKQTARKSTGGKAPR	0.0836593	0.586404
BAD_93_105	Q92934	FRGRSRSAPPNLW	-0.0370207	0.649932
FOXO3_25_37	O43524	QSRPRSCTWPLQR	0.028465	0.690572
RB_242_254	P06400	AVIPINGSPRTPR	-0.0325146	0.83489
GYS2_1_13	P54840	MLRGRSLSVTSLG	-0.00946009	0.854034

## Sheet: Figure 7C
Kinase Uniprot ID	Kinase Name	Mean Specificity Score	Mean Significance Score	Mean Final Score	Median Final score	Mean Kinase Statistic	Median Kinase Statistic	SD Kinase Statitistic	Mean peptide set size
P17612	PKA[alpha]	2.49828	1.53441	4.0327	4.14267	-1.21612	-1.22157	0.0165879	46.3333
Q13237	PKG2	2.09341	1.53441	3.62782	3.74473	-1.27942	-1.27835	0.0226391	32.6667
Q05655	PKC[delta]	1.62982	1.53441	3.16423	3.37675	-1.325	-1.35796	0.0495979	19.7778
Q13976	PKG1	1.71541	1.53441	3.24982	3.02872	-1.21911	-1.22332	0.0134236	35.4444
P17252	PKC[alpha]	1.37845	1.53441	2.91286	2.95078	-1.25656	-1.23654	0.0289493	24.3333
Q04759	PKC[theta]	0.956261	1.53441	2.49067	2.51942	-1.22723	-1.22496	0.0193905	19.3333
P11309	Pim1	0.827403	1.53441	2.36182	2.34333	-1.09315	-1.09116	0.00307037	51.8889
Q9P1W9	Pim2	0.717354	1.53441	2.25177	2.23359	-1.11121	-1.12515	0.0489634	32.4444
P51817	PRKX	0.791735	1.41463	2.20636	2.20817	-1.16481	-1.16074	0.0598711	27.3333
Q9UBS0	p70S6K[beta]	0.627483	1.50483	2.13231	2.19873	-1.14694	-1.11499	0.0787738	22.2222
P05129	PKC[gamma]	0.606248	1.53441	2.14066	2.18363	-1.1787	-1.18057	0.016809	12.1111
P05771	PKC[beta]	0.65403	1.53441	2.18844	2.16545	-1.25029	-1.25029	0	7
Q9HBY8	SGK2	0.650736	1.4041	2.05484	2.10127	-1.18465	-1.17895	0.0312943	13.1111
O14965	AurA/Aur2	0.514816	1.53441	2.04923	2.01882	-1.2203	-1.21478	0.016542	4.11111
P31749	Akt1/PKB[alpha]	0.464839	1.53441	1.99925	1.9765	-1.0855	-1.09098	0.0142045	24.4444
Q86V86	Pim3	0.519959	1.53441	2.05437	1.97078	-1.06551	-1.05517	0.0264163	48
Q05513	PKC[zeta]	0.43121	1.53441	1.96562	1.96625	-1.12766	-1.11851	0.0181747	7.33333
Q16566	CaMK4	0.853295	1.37809	2.23139	1.96465	-1.25095	-1.22287	0.0709953	11.7778
P68400	CK2[alpha]1	0.386076	1.53441	1.92049	1.90546	-1.13936	-1.13936	0	3
P24723	PKC[eta]	0.421546	1.53441	1.95596	1.89757	-1.09581	-1.0973	0.0379687	12.4444
P49674	CK1[epsilon]	0.669586	1.19382	1.86341	1.86341	-1.34721	-1.34721	NA	3
P41743	PKC[iota]	0.352823	1.53441	1.88724	1.86239	-1.06541	-1.08227	0.0314845	11.8889
P31751	Akt2/PKB[beta]	0.350249	1.48473	1.83498	1.85078	-1.05136	-1.05365	0.013507	22
Q96GD4	AurB/Aur1	0.313845	1.44137	1.75522	1.84894	-1.06532	-1.07614	0.0433794	4.11111
Q02156	PKC[epsilon]	0.31092	1.53441	1.84533	1.83851	-1.03731	-1.0384	0.0195157	17.6667
P11802	CDK4	0.276046	1.53441	1.81046	1.83351	-1.02064	-1.03333	0.038091	4.22222
Q00535	CDK5	0.289833	1.53441	1.82425	1.83351	-1.03333	-1.03333	0	4
Q00534	CDK6	0.274325	1.50096	1.77529	1.81873	-1.01296	-1.03333	0.0611347	3.88889
O75116	ROCK2	0.248155	1.40213	1.65029	1.81361	-0.89629	-0.805038	0.238748	4.8
Q15349	RSK1/p90RSK	0.243454	1.53441	1.77787	1.79697	-0.978568	-0.978568	0	6
Q8NI60	ADCK3	0.296593	1.53441	1.83101	1.77469	-1.02472	-0.936415	0.166375	8.11111
Q15131	CDK10	0.393261	1.43246	1.82572	1.77222	-1.12042	-1.1275	0.100274	5
Q15139	PKD1	0.231346	1.53441	1.76576	1.76045	-0.96908	-0.96908	0	6
Q9UIK4	DAPK2	0.441388	1.25975	1.70114	1.72335	-1.2052	-1.2052	0	3
O43930	PRKY	0.436542	1.31672	1.75326	1.72106	-1.12978	-1.13585	0.0517677	9
Q15418	RSK3	0.171107	1.53441	1.70552	1.71906	-0.918895	-0.918895	0	9
P51812	RSK2	0.166741	1.53441	1.70115	1.71525	-0.888272	-0.888272	0	7
Q16644	MAPKAPK3	0.153988	1.53441	1.6884	1.70019	-0.940385	-0.96949	0.0931449	28
O75582	MSK1	0.127466	1.53441	1.66188	1.6801	-0.843638	-0.843638	0	7
P23443	p70S6K	0.203535	1.51818	1.72171	1.67778	-0.96453	-0.920385	0.0873444	13.6667
O60285	NuaK1	0.12804	1.52098	1.64902	1.67662	-0.749762	-0.749762	0	3
P50750	CDK9	0.139228	1.53441	1.67364	1.65193	-0.82226	-0.75781	0.0966753	5.66667
O96017	CHK2	0.109201	1.53441	1.64361	1.62812	-0.886888	-0.874745	0.0861977	18.7778
Q00526	CDK3	0.108619	1.53441	1.64303	1.6265	-0.814308	-0.81813	0.0945668	7.55556
Q13153	PAK1	0.0582126	1.53441	1.59263	1.60639	-0.664125	-0.664125	0	6
O94921	PFTAIRE1	0.474702	1.11739	1.5921	1.59929	-1.20889	-1.20889	0	3
P49137	MAPKAPK2	0.0867245	1.53441	1.62114	1.59346	-0.905154	-0.895999	0.0485344	24.1111
P42345	mTOR/FRAP	0.157369	1.42222	1.57959	1.59244	-0.85736	-0.85589	0.0655553	4.88889
P16066	ANP[alpha]	0.0286172	1.53441	1.56303	1.57148	-0.796544	-0.780632	0.0343047	19.8889
Q96Q40	PFTAIRE2	0.301924	1.21441	1.51634	1.55664	-1.0396	-1.05122	0.0193683	5.55556
P28482	ERK2	0.0244345	1.34367	1.36811	1.55371	-0.586014	-0.660683	0.139991	9.55556
Q14164	IKK[epsilon]	0.281782	1.25897	1.54075	1.54006	-1.02607	-1.00933	0.0332242	4.77778
Q13131	AMPK[alpha]1	0.266096	1.27521	1.5413	1.52276	-1.01149	-1.05253	0.0575051	10
P04049	RAF1	0.104029	1.33294	1.43696	1.50585	-0.751729	-0.781682	0.0760365	5.33333
P45984	JNK2	0.112114	1.43853	1.55065	1.5002	-0.849874	-0.805555	0.0742715	10.3333
Q9UKE5	TNIK/ZC2	0.237048	1.23876	1.47581	1.48032	-0.984411	-0.984411	0	3
O15111	IKK[alpha]	0.276288	1.20583	1.48212	1.47361	-1.0277	-1.01387	0.0207358	3.66667
O95819	HGK/ZC1	0.23039	1.20326	1.43365	1.46324	-0.968949	-0.969398	0.00110117	3.83333
Q92772	CDKL2	0.264401	1.18046	1.44486	1.44486	-1.04143	-1.04143	NA	3
P24941	CDK2	0.0229811	1.33714	1.36012	1.43604	-0.570815	-0.60857	0.0949942	9.11111
Q13464	ROCK1	0.184142	1.31903	1.50317	1.4351	-0.885583	-0.837068	0.0664324	4.4
Q00532	CDKL1	0.0810111	1.40969	1.4907	1.4101	-0.708856	-0.649725	0.0973841	5.4
Q9BWU1	CDK11	0.164343	1.24154	1.40588	1.40796	-0.849931	-0.849931	0	3
P48729	CK1[alpha]	0.118289	1.22639	1.34468	1.38565	-0.839015	-0.854122	0.0558743	8
Q15759	p38[beta]	0.167999	1.232	1.4	1.37214	-0.867034	-0.759436	0.186365	3.66667
Q13535	ATR	0.113596	1.25897	1.37257	1.36267	-0.807017	-0.814386	0.0221073	5.88889
P15056	BRAF	0.0983684	1.27633	1.3747	1.34333	-0.658969	-0.641388	0.0527415	3.11111
O15264	p38[delta]	0.0225181	1.16431	1.18682	1.34287	-0.628246	-0.639954	0.0732031	10
P10398	ARAF	0.0918239	1.24932	1.34115	1.33483	-0.641388	-0.641388	0	3
O14920	IKK[beta]	0.0718101	0.915015	0.986825	1.29379	-0.586506	-0.665687	0.121428	3.66667
Q00537	PCTAIRE2	0.136677	1.1549	1.29158	1.29158	-0.768775	-0.768775	NA	3
P50613	CDK7	0.0244531	1.35485	1.37931	1.28333	-0.66323	-0.624774	0.0584233	10.8889
Q9UHD2	TBK1	0.1913	1.08375	1.27505	1.26664	-0.927073	-0.930897	0.00523675	3.6
P45983	JNK1	0.00495604	1.24057	1.24552	1.25882	-0.618092	-0.6176	0.0170898	14.5556
P53779	JNK3	0.00514904	1.22001	1.22516	1.25882	-0.614547	-0.6176	0.0202265	14.2222
O43293	DAPK3	0.119186	1.08619	1.20537	1.20537	-0.699123	-0.699123	NA	3
Q16539	MAPK14	0.0624364	1.2	1.26244	1.12531	-0.708125	-0.618109	0.1183	8.77778
P49841	GSK3[beta]	0.110525	0.970624	1.08115	1.07212	-0.710642	-0.710642	0	3
O14757	CHK1	0.0217314	0.888211	0.909943	0.955084	-0.473502	-0.496268	0.111551	6
P27361	ERK1	0.0268274	1.14929	1.17611	0.934047	-0.590841	-0.499614	0.150365	8.77778
P06493	CDC2/CDK1	0.0241081	1.02832	1.05243	0.911821	-0.561468	-0.523781	0.080615	8.55556
O75676	MSK2	0.0875441	0.707304	0.794848	0.794384	-0.623185	-0.623185	0	3
Q9Y6S9	RSKL2	0.037543	0.690657	0.7282	0.709665	-0.43748	-0.43748	0.153642	3.5
Q8IWB6	SgK307	0.0244204	0.528755	0.553175	0.551733	-0.302	-0.302	0	3
Q13164	ERK5	0.00575065	0.61328	0.619031	0.485915	-0.313766	-0.311562	0.166742	7.11111
O76039	CDKL5	0.0321549	0.508517	0.540672	0.442965	-0.419679	-0.383288	0.192789	4.28571
Q8TD08	ERK7	0.0259491	0.393619	0.419568	0.419568	-0.330171	-0.330171	NA	3
P53778	p38[gamma]	0.00135638	0.346334	0.34769	0.37146	-0.140268	-0.146335	0.125193	6.55556
Q16512	PKN1/PRK1	0.00960052	0.277655	0.287256	0.0517984	-0.126619	0.0701388	0.254878	4

## Sheet: Figure 7D-E
ID	Description	KinaseRatio	BgRatio	pvalue	p.adjust	qvalue	KinaseID	Count
R-HSA-4420097	VEGFA-VEGFR2 Pathway	15/65	99/10955	1.04534e-17	5.56973e-15	3.13196e-15	PRKACA/PRKCD/PRKCA/PRKCB/AKT1/PRKCZ/AKT2/ROCK2/MAPKAPK3/PAK1/MAPKAPK2/MTOR/ROCK1/MAPK11/MAPK13	15
R-HSA-168164	Toll Like Receptor 3 (TLR3) Cascade	15/65	105/10955	2.63288e-17	5.56973e-15	3.13196e-15	RPS6KA2/RPS6KA1/RPS6KA3/MAPKAPK3/RPS6KA5/MAPKAPK2/MAPK1/IKBKE/MAPK9/CHUK/MAPK11/IKBKB/TBK1/MAPK8/MAPK10	15
R-HSA-450294	MAP kinase activation	13/65	64/10955	3.29758e-17	5.56973e-15	3.13196e-15	RPS6KA2/RPS6KA1/RPS6KA3/MAPKAPK3/RPS6KA5/MAPKAPK2/MAPK1/MAPK9/CHUK/MAPK11/IKBKB/MAPK8/MAPK10	13
R-HSA-194138	Signaling by VEGF	15/65	108/10955	4.08887e-17	5.56973e-15	3.13196e-15	PRKACA/PRKCD/PRKCA/PRKCB/AKT1/PRKCZ/AKT2/ROCK2/MAPKAPK3/PAK1/MAPKAPK2/MTOR/ROCK1/MAPK11/MAPK13	15
R-HSA-166166	MyD88-independent TLR4 cascade	15/65	110/10955	5.44273e-17	5.56973e-15	3.13196e-15	RPS6KA2/RPS6KA1/RPS6KA3/MAPKAPK3/RPS6KA5/MAPKAPK2/MAPK1/IKBKE/MAPK9/CHUK/MAPK11/IKBKB/TBK1/MAPK8/MAPK10	15
R-HSA-937061	TRIF(TICAM1)-mediated TLR4 signaling	15/65	110/10955	5.44273e-17	5.56973e-15	3.13196e-15	RPS6KA2/RPS6KA1/RPS6KA3/MAPKAPK3/RPS6KA5/MAPKAPK2/MAPK1/IKBKE/MAPK9/CHUK/MAPK11/IKBKB/TBK1/MAPK8/MAPK10	15
R-HSA-448424	Interleukin-17 signaling	13/65	72/10955	1.71782e-16	1.50677e-14	8.47286e-15	RPS6KA2/RPS6KA1/RPS6KA3/MAPKAPK3/RPS6KA5/MAPKAPK2/MAPK1/MAPK9/CHUK/MAPK11/IKBKB/MAPK8/MAPK10	13
R-HSA-450282	MAPK targets/ Nuclear events mediated by MAP kinases	10/65	31/10955	1.05547e-15	8.10075e-14	4.5552e-14	RPS6KA2/RPS6KA1/RPS6KA3/RPS6KA5/MAPKAPK2/MAPK1/MAPK9/MAPK11/MAPK8/MAPK10	10
R-HSA-166016	Toll Like Receptor 4 (TLR4) Cascade	15/65	146/10955	4.20159e-15	2.86642e-13	1.61184e-13	RPS6KA2/RPS6KA1/RPS6KA3/MAPKAPK3/RPS6KA5/MAPKAPK2/MAPK1/IKBKE/MAPK9/CHUK/MAPK11/IKBKB/TBK1/MAPK8/MAPK10	15
R-HSA-168142	Toll Like Receptor 10 (TLR10) Cascade	13/65	97/10955	1.01049e-14	5.17035e-13	2.90738e-13	RPS6KA2/RPS6KA1/RPS6KA3/MAPKAPK3/RPS6KA5/MAPKAPK2/MAPK1/MAPK9/CHUK/MAPK11/IKBKB/MAPK8/MAPK10	13
R-HSA-168176	Toll Like Receptor 5 (TLR5) Cascade	13/65	97/10955	1.01049e-14	5.17035e-13	2.90738e-13	RPS6KA2/RPS6KA1/RPS6KA3/MAPKAPK3/RPS6KA5/MAPKAPK2/MAPK1/MAPK9/CHUK/MAPK11/IKBKB/MAPK8/MAPK10	13
R-HSA-975871	MyD88 cascade initiated on plasma membrane	13/65	97/10955	1.01049e-14	5.17035e-13	2.90738e-13	RPS6KA2/RPS6KA1/RPS6KA3/MAPKAPK3/RPS6KA5/MAPKAPK2/MAPK1/MAPK9/CHUK/MAPK11/IKBKB/MAPK8/MAPK10	13
R-HSA-975138	TRAF6 mediated induction of NFkB and MAP kinases upon TLR7/8 or 9 activation	13/65	103/10955	2.25951e-14	1.06718e-12	6.00097e-13	RPS6KA2/RPS6KA1/RPS6KA3/MAPKAPK3/RPS6KA5/MAPKAPK2/MAPK1/MAPK9/CHUK/MAPK11/IKBKB/MAPK8/MAPK10	13
R-HSA-975155	MyD88 dependent cascade initiated on endosome	13/65	104/10955	2.57084e-14	1.1275e-12	6.34012e-13	RPS6KA2/RPS6KA1/RPS6KA3/MAPKAPK3/RPS6KA5/MAPKAPK2/MAPK1/MAPK9/CHUK/MAPK11/IKBKB/MAPK8/MAPK10	13
R-HSA-168181	Toll Like Receptor 7/8 (TLR7/8) Cascade	13/65	105/10955	2.92109e-14	1.1957e-12	6.72363e-13	RPS6KA2/RPS6KA1/RPS6KA3/MAPKAPK3/RPS6KA5/MAPKAPK2/MAPK1/MAPK9/CHUK/MAPK11/IKBKB/MAPK8/MAPK10	13
R-HSA-168898	Toll-like Receptor Cascades	15/65	168/10955	3.46701e-14	1.33046e-12	7.48144e-13	RPS6KA2/RPS6KA1/RPS6KA3/MAPKAPK3/RPS6KA5/MAPKAPK2/MAPK1/IKBKE/MAPK9/CHUK/MAPK11/IKBKB/TBK1/MAPK8/MAPK10	15
R-HSA-168138	Toll Like Receptor 9 (TLR9) Cascade	13/65	108/10955	4.25136e-14	1.53549e-12	8.63435e-13	RPS6KA2/RPS6KA1/RPS6KA3/MAPKAPK3/RPS6KA5/MAPKAPK2/MAPK1/MAPK9/CHUK/MAPK11/IKBKB/MAPK8/MAPK10	13
R-HSA-166058	MyD88:MAL(TIRAP) cascade initiated on plasma membrane	13/65	113/10955	7.75177e-14	2.50505e-12	1.40863e-12	RPS6KA2/RPS6KA1/RPS6KA3/MAPKAPK3/RPS6KA5/MAPKAPK2/MAPK1/MAPK9/CHUK/MAPK11/IKBKB/MAPK8/MAPK10	13
R-HSA-168188	Toll Like Receptor TLR6:TLR2 Cascade	13/65	113/10955	7.75177e-14	2.50505e-12	1.40863e-12	RPS6KA2/RPS6KA1/RPS6KA3/MAPKAPK3/RPS6KA5/MAPKAPK2/MAPK1/MAPK9/CHUK/MAPK11/IKBKB/MAPK8/MAPK10	13
R-HSA-168179	Toll Like Receptor TLR1:TLR2 Cascade	13/65	116/10955	1.09624e-13	3.20519e-12	1.80233e-12	RPS6KA2/RPS6KA1/RPS6KA3/MAPKAPK3/RPS6KA5/MAPKAPK2/MAPK1/MAPK9/CHUK/MAPK11/IKBKB/MAPK8/MAPK10	13
R-HSA-181438	Toll Like Receptor 2 (TLR2) Cascade	13/65	116/10955	1.09624e-13	3.20519e-12	1.80233e-12	RPS6KA2/RPS6KA1/RPS6KA3/MAPKAPK3/RPS6KA5/MAPKAPK2/MAPK1/MAPK9/CHUK/MAPK11/IKBKB/MAPK8/MAPK10	13
R-HSA-2559583	Cellular Senescence	15/65	196/10955	3.4066e-13	9.50751e-12	5.34625e-12	CDK4/CDK6/RPS6KA2/RPS6KA1/RPS6KA3/MAPKAPK3/MAPKAPK2/MAPK1/MAPK9/TNIK/MAP4K4/CDK2/MAPK11/MAPK8/MAPK10	15
R-HSA-5633007	Regulation of TP53 Activity	13/65	160/10955	7.17803e-12	1.91622e-10	1.07753e-10	AURKA/AKT1/CSNK2A1/AKT2/AURKB/CDK5/NUAK1/CHEK2/MTOR/PRKAA1/CDK2/MAPK11/ATR	13
R-HSA-187037	Signaling by NTRK1 (TRKA)	11/65	115/10955	5.83908e-11	1.49383e-09	8.40007e-10	CDK5/RPS6KA2/RPS6KA1/RPS6KA3/MAPKAPK3/RPS6KA5/MAPKAPK2/MAPK1/MAPK11/BRAF/MAPK13	11
R-HSA-6804756	Regulation of TP53 Activity through Phosphorylation	10/65	92/10955	1.29697e-10	3.14562e-09	1.76884e-09	AURKA/CSNK2A1/AURKB/CDK5/NUAK1/CHEK2/PRKAA1/CDK2/MAPK11/ATR	10
R-HSA-2559580	Oxidative Stress Induced Senescence	11/65	124/10955	1.33202e-10	3.14562e-09	1.76884e-09	CDK4/CDK6/MAPKAPK3/MAPKAPK2/MAPK1/MAPK9/TNIK/MAP4K4/MAPK11/MAPK8/MAPK10	11
R-HSA-166520	Signaling by NTRKs	11/65	134/10955	3.09333e-10	7.03446e-09	3.9556e-09	CDK5/RPS6KA2/RPS6KA1/RPS6KA3/MAPKAPK3/RPS6KA5/MAPKAPK2/MAPK1/MAPK11/BRAF/MAPK13	11
R-HSA-449147	Signaling by Interleukins	17/65	473/10955	1.29789e-09	2.84608e-08	1.6004e-08	PRKACA/PIM1/AKT1/RPS6KA2/RPS6KA1/RPS6KA3/MAPKAPK3/RPS6KA5/MAPKAPK2/MAPK1/MAPK9/CHUK/MAPK11/IKBKB/TBK1/MAPK8/MAPK10	17
R-HSA-450341	Activation of the AP-1 family of transcription factors	5/65	10/10955	1.54865e-09	3.27887e-08	1.84377e-08	MAPK1/MAPK9/MAPK11/MAPK8/MAPK10	5
R-HSA-3700989	Transcriptional Regulation by TP53	15/65	362/10955	2.11275e-09	4.3241e-08	2.43152e-08	AURKA/AKT1/CSNK2A1/AKT2/AURKB/CDK5/NUAK1/CDK9/CHEK2/MTOR/PRKAA1/CDK2/MAPK11/ATR/CDK7	15
R-HSA-198725	Nuclear Events (kinase and transcription factor activation)	8/65	61/10955	2.26471e-09	4.48559e-08	2.52232e-08	CDK5/RPS6KA2/RPS6KA1/RPS6KA3/RPS6KA5/MAPKAPK2/MAPK1/MAPK11	8
R-HSA-198753	ERK/MAPK targets	6/65	22/10955	2.38713e-09	4.53537e-08	2.55032e-08	RPS6KA2/RPS6KA1/RPS6KA3/RPS6KA5/MAPK1/MAPK11	6
R-HSA-111996	Ca-dependent events	7/65	39/10955	2.46099e-09	4.53537e-08	2.55032e-08	PRKACA/PRKCD/PRKCA/PRKX/PRKCG/CAMK4/MAPK1	7
R-HSA-9006925	Intracellular signaling by second messengers	14/65	309/10955	2.51144e-09	4.53537e-08	2.55032e-08	PRKACA/PRKCD/PRKCA/PRKX/RPS6KB2/PRKCG/AKT1/CAMK4/CSNK2A1/AKT2/PRKCE/MTOR/MAPK1/CHUK	14
R-HSA-5668599	RHO GTPases Activate NADPH Oxidases	6/65	24/10955	4.26653e-09	7.4847e-08	4.20878e-08	PRKCD/PRKCA/PRKCB/PRKCZ/MAPK1/MAPK11	6
R-HSA-1489509	DAG and IP3 signaling	7/65	43/10955	5.06097e-09	8.63177e-08	4.8538e-08	PRKACA/PRKCD/PRKCA/PRKX/PRKCG/CAMK4/PRKCE	7
R-HSA-418597	G alpha (z) signalling events	7/65	48/10955	1.12982e-08	1.8749e-07	1.05429e-07	PRKCD/PRKCA/PRKCQ/PRKCG/PRKCB/PRKCH/PRKCE	7
R-HSA-112043	PLC beta mediated events	7/65	51/10955	1.75195e-08	2.83078e-07	1.5918e-07	PRKACA/PRKCD/PRKCA/PRKX/PRKCG/CAMK4/MAPK1	7
R-HSA-438064	Post NMDA receptor activation events	8/65	80/10955	2.04094e-08	3.21318e-07	1.80683e-07	PRKACA/PRKX/CAMK4/RPS6KA2/RPS6KA1/RPS6KA3/MAPK1/PRKAA1	8
R-HSA-112314	Neurotransmitter receptors and postsynaptic signal transmission	11/65	205/10955	2.7874e-08	4.27866e-07	2.40597e-07	PRKACA/PRKCA/PRKX/PRKCG/PRKCB/CAMK4/RPS6KA2/RPS6KA1/RPS6KA3/MAPK1/PRKAA1	11
R-HSA-112040	G-protein mediated events	7/65	56/10955	3.42885e-08	5.13491e-07	2.88745e-07	PRKACA/PRKCD/PRKCA/PRKX/PRKCG/CAMK4/MAPK1	7
R-HSA-187687	Signalling to ERKs	6/65	34/10955	4.07039e-08	5.95052e-07	3.34608e-07	MAPKAPK3/MAPKAPK2/MAPK1/MAPK11/BRAF/MAPK13	6
R-HSA-881907	Gastrin-CREB signalling pathway via PKC and MAPK	5/65	18/10955	5.0762e-08	7.24834e-07	4.07587e-07	PRKCA/RPS6KA2/RPS6KA1/RPS6KA3/MAPK1	5
R-HSA-111885	Opioid Signalling	8/65	92/10955	6.19815e-08	8.64924e-07	4.86362e-07	PRKACA/PRKCD/PRKCA/PRKX/PRKCG/CAMK4/CDK5/MAPK1	8
R-HSA-442755	Activation of NMDA receptors and postsynaptic events	8/65	93/10955	6.75006e-08	9.06503e-07	5.09743e-07	PRKACA/PRKX/CAMK4/RPS6KA2/RPS6KA1/RPS6KA3/MAPK1/PRKAA1	8
R-HSA-111933	Calmodulin induced events	6/65	37/10955	6.93903e-08	9.06503e-07	5.09743e-07	PRKACA/PRKCD/PRKCA/PRKX/PRKCG/CAMK4	6
R-HSA-111997	CaM pathway	6/65	37/10955	6.93903e-08	9.06503e-07	5.09743e-07	PRKACA/PRKCD/PRKCA/PRKX/PRKCG/CAMK4	6
R-HSA-5674400	Constitutive Signaling by AKT1 E17K in Cancer	5/65	25/10955	3.04858e-07	3.89964e-06	2.19284e-06	RPS6KB2/AKT1/AKT2/MTOR/CHUK	5
R-HSA-76002	Platelet activation, signaling and aggregation	11/65	263/10955	3.51933e-07	4.40993e-06	2.47978e-06	PRKCD/PRKCA/PRKCQ/PRKCG/PRKCB/AKT1/PRKCZ/PRKCH/PRKCE/MAPK1/RAF1	11
R-HSA-376172	DSCAM interactions	4/65	11/10955	3.6104e-07	4.43357e-06	2.49307e-06	PAK1/MAPK11/MAPK13/MAPK8	4
R-HSA-112315	Transmission across Chemical Synapses	11/65	270/10955	4.5752e-07	5.50818e-06	3.09735e-06	PRKACA/PRKCA/PRKX/PRKCG/PRKCB/CAMK4/RPS6KA2/RPS6KA1/RPS6KA3/MAPK1/PRKAA1	11
R-HSA-171007	p38MAPK events	4/65	13/10955	7.75302e-07	9.15453e-06	5.14776e-06	MAPKAPK3/MAPKAPK2/MAPK11/MAPK13	4
R-HSA-109581	Apoptosis	9/65	180/10955	1.03534e-06	1.19943e-05	6.74462e-06	PRKCD/PRKCQ/AKT1/AKT2/DAPK2/MAPK1/ROCK1/MAPK8/DAPK3	9
R-HSA-2871796	FCERI mediated MAPK activation	5/65	32/10955	1.1191e-06	1.27246e-05	7.15527e-06	PAK1/MAPK1/MAPK9/MAPK8/MAPK10	5
R-HSA-2454202	Fc epsilon receptor (FCERI) signaling	8/65	134/10955	1.14136e-06	1.27418e-05	7.16493e-06	PRKCQ/PAK1/MAPK1/MAPK9/CHUK/IKBKB/MAPK8/MAPK10	8
R-HSA-6804757	Regulation of TP53 Degradation	5/65	36/10955	2.0571e-06	2.25547e-05	1.26829e-05	AKT1/AKT2/CHEK2/MTOR/CDK2	5
R-HSA-6806003	Regulation of TP53 Expression and Degradation	5/65	37/10955	2.36768e-06	2.55045e-05	1.43417e-05	AKT1/AKT2/CHEK2/MTOR/CDK2	5
R-HSA-2559582	Senescence-Associated Secretory Phenotype (SASP)	7/65	111/10955	3.88876e-06	4.11673e-05	2.31491e-05	CDK4/CDK6/RPS6KA2/RPS6KA1/RPS6KA3/MAPK1/CDK2	7
R-HSA-165159	MTOR signalling	5/65	41/10955	3.99684e-06	4.15942e-05	2.33892e-05	AKT1/AKT2/RPS6KB1/MTOR/PRKAA1	5
R-HSA-5357801	Programmed Cell Death	9/65	213/10955	4.17222e-06	4.26957e-05	2.40085e-05	PRKCD/PRKCQ/AKT1/AKT2/DAPK2/MAPK1/ROCK1/MAPK8/DAPK3	9
R-HSA-416476	G alpha (q) signalling events	9/65	217/10955	4.85745e-06	4.8893e-05	2.74934e-05	PRKCD/PRKCA/PRKCQ/PRKCH/PRKCE/RPS6KA2/RPS6KA1/RPS6KA3/MAPK1	9
R-HSA-167044	Signalling to RAS	4/65	20/10955	5.09213e-06	5.04285e-05	2.83569e-05	MAPKAPK3/MAPKAPK2/MAPK11/MAPK13	4
R-HSA-373760	L1CAM interactions	7/65	119/10955	6.17978e-06	5.91546e-05	3.32637e-05	CSNK2A1/RPS6KA2/RPS6KA1/RPS6KA3/RPS6KA5/PAK1/MAPK1	7
R-HSA-5218921	VEGFR2 mediated cell proliferation	4/65	21/10955	6.2623e-06	5.91546e-05	3.32637e-05	PRKCD/PRKCA/PRKCB/PRKCZ	4
R-HSA-5621575	CD209 (DC-SIGN) signaling	4/65	21/10955	6.2623e-06	5.91546e-05	3.32637e-05	PRKACA/RPS6KA5/PAK1/RAF1	4
R-HSA-437239	Recycling pathway of L1	5/65	47/10955	7.95999e-06	7.4052e-05	4.16408e-05	RPS6KA2/RPS6KA1/RPS6KA3/RPS6KA5/MAPK1	5
R-HSA-5357905	Regulation of TNFR1 signaling	5/65	48/10955	8.84509e-06	8.1058e-05	4.55804e-05	MAPKAPK2/IKBKE/CHUK/IKBKB/TBK1	5
R-HSA-1227986	Signaling by ERBB2	5/65	50/10955	1.08452e-05	9.65066e-05	5.42674e-05	PRKCD/PRKCA/AKT1/AKT2/PRKCE	5
R-HSA-373752	Netrin-1 signaling	5/65	50/10955	1.08452e-05	9.65066e-05	5.42674e-05	PRKCQ/PAK1/MAPK11/MAPK13/MAPK8	5
R-HSA-114508	Effects of PIP2 hydrolysis	4/65	27/10955	1.78786e-05	0.000156821	8.81834e-05	PRKCD/PRKCQ/PRKCH/PRKCE	4
R-HSA-5621481	C-type lectin receptors (CLRs)	7/65	142/10955	1.97054e-05	0.000169224	9.51576e-05	PRKACA/PRKCD/RPS6KA5/PAK1/RAF1/CHUK/IKBKB	7
R-HSA-195258	RHO GTPase Effectors	10/65	326/10955	1.98438e-05	0.000169224	9.51576e-05	PRKCD/PRKCA/PRKCB/PRKCZ/AURKB/ROCK2/PAK1/MAPK1/ROCK1/MAPK11	10
R-HSA-75893	TNF signaling	5/65	57/10955	2.07584e-05	0.000174598	9.81797e-05	MAPKAPK2/IKBKE/CHUK/IKBKB/TBK1	5
R-HSA-195721	Signaling by WNT	10/65	331/10955	2.26247e-05	0.000187724	0.00010556	PRKG2/PRKG1/PRKCA/PRKCG/PRKCB/AKT1/CSNK2A1/CSNK1E/AKT2/CSNK1A1	10
R-HSA-442742	CREB1 phosphorylation through NMDA receptor-mediated activation of RAS signaling	4/65	29/10955	2.39812e-05	0.000193743	0.000108945	RPS6KA2/RPS6KA1/RPS6KA3/MAPK1	4
R-HSA-5218920	VEGFR2 mediated vascular permeability	4/65	29/10955	2.39812e-05	0.000193743	0.000108945	AKT1/AKT2/PAK1/MTOR	4
R-HSA-112316	Neuronal System	11/65	410/10955	2.5519e-05	0.000203489	0.000114425	PRKACA/PRKCA/PRKX/PRKCG/PRKCB/CAMK4/RPS6KA2/RPS6KA1/RPS6KA3/MAPK1/PRKAA1	11
R-HSA-73887	Death Receptor Signaling	7/65	154/10955	3.32773e-05	0.000261952	0.0001473	PRKCI/MAPKAPK2/IKBKE/CHUK/IKBKB/TBK1/MAPK8	7
R-HSA-389356	CD28 co-stimulation	4/65	33/10955	4.05872e-05	0.00031545	0.000177383	AKT1/AKT2/PAK1/MTOR	4
R-HSA-5663202	Diseases of signal transduction by growth factor receptors and second messengers	11/65	433/10955	4.21297e-05	0.000323346	0.000181823	PIM1/RPS6KB2/AKT1/AKT2/MTOR/MAPK1/RAF1/CHUK/CSNK1A1/BRAF/ARAF	11
R-HSA-6802948	Signaling by high-kinase activity BRAF mutants	4/65	36/10955	5.7651e-05	0.000437009	0.000245738	MAPK1/RAF1/BRAF/ARAF	4
R-HSA-168638	NOD1/2 Signaling Pathway	4/65	37/10955	6.4352e-05	0.000481855	0.000270956	CHUK/MAPK11/MAPK13/IKBKB	4
R-HSA-198323	AKT phosphorylates targets in the cytosol	3/65	14/10955	6.92648e-05	0.000512392	0.000288127	AKT1/AKT2/CHUK	3
R-HSA-5099900	WNT5A-dependent internalization of FZD4	3/65	15/10955	8.62142e-05	0.000630185	0.000354364	PRKCA/PRKCG/PRKCB	3
R-HSA-5674135	MAP2K and MAPK activation	4/65	40/10955	8.78667e-05	0.000634708	0.000356908	MAPK1/RAF1/BRAF/ARAF	4
R-HSA-392517	Rap1 signalling	3/65	16/10955	0.00010566	0.000754366	0.000424194	PRKACA/PRKG1/RAF1	3
R-HSA-5675221	Negative regulation of MAPK pathway	4/65	43/10955	0.00011708	0.000816898	0.000459356	MAPK1/RAF1/BRAF/ARAF	4
R-HSA-9656223	Signaling by RAF1 mutants	4/65	43/10955	0.00011708	0.000816898	0.000459356	MAPK1/RAF1/BRAF/ARAF	4
R-HSA-416993	Trafficking of GluR2-containing AMPA receptors	3/65	17/10955	0.000127759	0.000853277	0.000479813	PRKCA/PRKCG/PRKCB	3
R-HSA-9659787	Aberrant regulation of mitotic G1/S transition in cancer due to RB1 defects	3/65	17/10955	0.000127759	0.000853277	0.000479813	CDK4/CDK6/CDK2	3
R-HSA-9661069	Defective binding of RB1 mutants to E2F1,(E2F2, E2F3)	3/65	17/10955	0.000127759	0.000853277	0.000479813	CDK4/CDK6/CDK2	3
R-HSA-69202	Cyclin E associated events during G1/S transition	5/65	83/10955	0.000127853	0.000853277	0.000479813	AKT1/AKT2/CDK4/CDK2/CDK7	5
R-HSA-69656	Cyclin A:Cdk2-associated events at S phase entry	5/65	85/10955	0.000143131	0.000944973	0.000531375	AKT1/AKT2/CDK4/CDK2/CDK7	5
R-HSA-6802946	Signaling by moderate kinase activity BRAF mutants	4/65	47/10955	0.000166234	0.00103098	0.000579741	MAPK1/RAF1/BRAF/ARAF	4
R-HSA-6802949	Signaling by RAS mutants	4/65	47/10955	0.000166234	0.00103098	0.000579741	MAPK1/RAF1/BRAF/ARAF	4
R-HSA-6802955	Paradoxical activation of RAF signaling by kinase inactive BRAF	4/65	47/10955	0.000166234	0.00103098	0.000579741	MAPK1/RAF1/BRAF/ARAF	4
R-HSA-69231	Cyclin D associated events in G1	4/65	47/10955	0.000166234	0.00103098	0.000579741	CDK4/CDK6/CDK2/CDK7	4
R-HSA-69236	G1 Phase	4/65	47/10955	0.000166234	0.00103098	0.000579741	CDK4/CDK6/CDK2/CDK7	4
R-HSA-9649948	Signaling downstream of RAS mutants	4/65	47/10955	0.000166234	0.00103098	0.000579741	MAPK1/RAF1/BRAF/ARAF	4
R-HSA-450531	Regulation of mRNA stability by proteins that bind AU-rich elements	5/65	88/10955	0.000168626	0.00103536	0.000582202	PRKCD/PRKCA/AKT1/MAPKAPK2/MAPK11	5
R-HSA-5627117	RHO GTPases Activate ROCKs	3/65	20/10955	0.000211476	0.00128561	0.000722919	ROCK2/PAK1/ROCK1	3
R-HSA-453279	Mitotic G1 phase and G1/S transition	6/65	149/10955	0.000244167	0.00145045	0.000815611	AKT1/AKT2/CDK4/CDK6/CDK2/CDK7	6
R-HSA-1606322	ZBP1(DAI) mediated induction of type I IFNs	3/65	21/10955	0.000245678	0.00145045	0.000815611	CHUK/IKBKB/TBK1	3
R-HSA-445144	Signal transduction by L1	3/65	21/10955	0.000245678	0.00145045	0.000815611	CSNK2A1/PAK1/MAPK1	3
R-HSA-1250196	SHC1 events in ERBB2 signaling	3/65	22/10955	0.000283266	0.00164081	0.000922655	PRKCD/PRKCA/PRKCE	3
R-HSA-389357	CD28 dependent PI3K/Akt signaling	3/65	22/10955	0.000283266	0.00164081	0.000922655	AKT1/AKT2/MTOR	3
R-HSA-109606	Intrinsic Pathway for Apoptosis	4/65	55/10955	0.000306761	0.00176029	0.000989845	AKT1/AKT2/MAPK1/MAPK8	4
R-HSA-450321	JNK (c-Jun kinases) phosphorylation and activation mediated by activated human TAK1	3/65	23/10955	0.000324379	0.00184415	0.001037	MAPK9/MAPK8/MAPK10	3
R-HSA-168643	Nucleotide-binding domain, leucine rich repeat containing receptor (NLR) signaling pathways	4/65	57/10955	0.000352151	0.00198367	0.00111546	CHUK/MAPK11/MAPK13/IKBKB	4
R-HSA-2219528	PI3K/AKT Signaling in Cancer	5/65	104/10955	0.000368035	0.00202374	0.00113799	RPS6KB2/AKT1/AKT2/MTOR/CHUK	5
R-HSA-450302	activated TAK1 mediates p38 MAPK activation	3/65	24/10955	0.000369151	0.00202374	0.00113799	MAPKAPK3/MAPKAPK2/MAPK11	3
R-HSA-9634638	Estrogen-dependent nuclear events downstream of ESR-membrane signaling	3/65	24/10955	0.000369151	0.00202374	0.00113799	AKT1/AKT2/MAPK1	3
R-HSA-418594	G alpha (i) signalling events	8/65	319/10955	0.000563479	0.00306174	0.00172167	PRKACA/PRKCD/PRKCA/PRKX/PRKCG/CAMK4/CDK5/MAPK1	8
R-HSA-373755	Semaphorin interactions	4/65	65/10955	0.000582533	0.0031375	0.00176427	CDK5/ROCK2/PAK1/ROCK1	4
R-HSA-5683057	MAPK family signaling cascades	8/65	325/10955	0.000637078	0.00340144	0.00191269	PRKACA/PRKG2/PRKCQ/PAK1/MAPK1/RAF1/BRAF/ARAF	8
R-HSA-6802952	Signaling by BRAF and RAF1 fusions	4/65	67/10955	0.000653666	0.00345992	0.00194558	MAPK1/RAF1/BRAF/ARAF	4
R-HSA-9679506	SARS-CoV Infections	9/65	414/10955	0.000704539	0.00369732	0.00207907	AKT1/AKT2/ROCK2/IKBKE/CHUK/ROCK1/CSNK1A1/IKBKB/TBK1	9
R-HSA-114452	Activation of BH3-only proteins	3/65	30/10955	0.00072192	0.00375643	0.00211231	AKT1/AKT2/MAPK8	3
R-HSA-388841	Costimulation by the CD28 family	4/65	69/10955	0.000730753	0.00377044	0.00212019	AKT1/AKT2/PAK1/MTOR	4
R-HSA-399719	Trafficking of AMPA receptors	3/65	31/10955	0.000795895	0.00403867	0.00227102	PRKCA/PRKCG/PRKCB	3
R-HSA-399721	Glutamate binding, activation of AMPA receptors and synaptic plasticity	3/65	31/10955	0.000795895	0.00403867	0.00227102	PRKCA/PRKCG/PRKCB	3
R-HSA-397795	G-protein beta:gamma signalling	3/65	32/10955	0.000874522	0.00440128	0.00247492	AKT1/AKT2/PAK1	3
R-HSA-2559585	Oncogene Induced Senescence	3/65	33/10955	0.000957916	0.00474323	0.0026672	CDK4/CDK6/MAPK1	3
R-HSA-9022692	Regulation of MECP2 expression and activity	3/65	33/10955	0.000957916	0.00474323	0.0026672	PRKACA/CAMK4/AURKB	3
R-HSA-1257604	PIP3 activates AKT signaling	7/65	267/10955	0.000983503	0.00483097	0.00271654	RPS6KB2/AKT1/CSNK2A1/AKT2/MTOR/MAPK1/CHUK	7
R-HSA-69206	G1/S Transition	5/65	131/10955	0.00105348	0.0051336	0.00288672	AKT1/AKT2/CDK4/CDK2/CDK7	5
R-HSA-9009391	Extra-nuclear estrogen signaling	4/65	77/10955	0.00110408	0.00533784	0.00300156	AKT1/PRKCZ/AKT2/MAPK1	4
R-HSA-5673000	RAF activation	3/65	36/10955	0.00123778	0.00589147	0.00331288	RAF1/BRAF/ARAF	3
R-HSA-9687139	Aberrant regulation of mitotic cell cycle due to RB1 defects	3/65	36/10955	0.00123778	0.00589147	0.00331288	CDK4/CDK6/CDK2	3
R-HSA-9705683	SARS-CoV-2-host interactions	6/65	203/10955	0.00125129	0.00590993	0.00332326	AKT1/AKT2/IKBKE/CHUK/IKBKB/TBK1	6
R-HSA-168928	DDX58/IFIH1-mediated induction of interferon-alpha/beta	4/65	82/10955	0.00139575	0.00654192	0.00367864	IKBKE/CHUK/IKBKB/TBK1	4
R-HSA-6807070	PTEN Regulation	5/65	140/10955	0.00141693	0.00659086	0.00370616	AKT1/CSNK2A1/AKT2/MTOR/MAPK1	5
R-HSA-111465	Apoptotic cleavage of cellular proteins	3/65	38/10955	0.00145016	0.00659552	0.00370878	PRKCD/PRKCQ/ROCK1	3
R-HSA-9013407	RHOH GTPase cycle	3/65	38/10955	0.00145016	0.00659552	0.00370878	ROCK2/PAK1/ROCK1	3
R-HSA-9675126	Diseases of mitotic cell cycle	3/65	38/10955	0.00145016	0.00659552	0.00370878	CDK4/CDK6/CDK2	3
R-HSA-418889	Caspase activation via Dependence Receptors in the absence of ligand	2/65	10/10955	0.00151284	0.00683001	0.00384064	DAPK2/DAPK3	2
R-HSA-6802957	Oncogenic MAPK signaling	4/65	84/10955	0.00152618	0.00683996	0.00384623	MAPK1/RAF1/BRAF/ARAF	4
R-HSA-2029480	Fcgamma receptor (FCGR) dependent phagocytosis	4/65	86/10955	0.00166488	0.00740751	0.00416537	PRKCD/PRKCE/PAK1/MAPK1	4
R-HSA-3858494	Beta-catenin independent WNT signaling	5/65	146/10955	0.0017059	0.00753543	0.00423731	PRKG2/PRKG1/PRKCA/PRKCG/PRKCB	5
R-HSA-5628897	TP53 Regulates Metabolic Genes	4/65	87/10955	0.00173742	0.00761981	0.00428475	AKT1/AKT2/MTOR/PRKAA1	4
R-HSA-9614399	Regulation of localization of FOXO transcription factors	2/65	11/10955	0.00184196	0.008021	0.00451035	AKT1/AKT2	2
R-HSA-9694516	SARS-CoV-2 Infection	7/65	299/10955	0.00188853	0.00811092	0.00456092	AKT1/AKT2/IKBKE/CHUK/CSNK1A1/IKBKB/TBK1	7
R-HSA-3371556	Cellular response to heat stress	4/65	89/10955	0.00188903	0.00811092	0.00456092	MAPKAPK2/MTOR/MAPK1/ATR	4
R-HSA-3928662	EPHB-mediated forward signaling	3/65	42/10955	0.00194038	0.00827358	0.00465238	ROCK2/PAK1/ROCK1	3
R-HSA-1474151	Tetrahydrobiopterin (BH4) synthesis, recycling, salvage and regulation	2/65	12/10955	0.0022019	0.00913492	0.00513673	PRKG2/AKT1	2
R-HSA-170968	Frs2-mediated activation	2/65	12/10955	0.0022019	0.00913492	0.00513673	MAPK1/BRAF	2
R-HSA-9013973	TICAM1-dependent activation of IRF3/IRF7	2/65	12/10955	0.0022019	0.00913492	0.00513673	IKBKE/TBK1	2
R-HSA-9755779	SARS-CoV-2 targets host intracellular signalling and regulatory pathways	2/65	12/10955	0.0022019	0.00913492	0.00513673	AKT1/AKT2	2
R-HSA-1358803	Downregulation of ERBB2:ERBB3 signaling	2/65	13/10955	0.00259231	0.0105409	0.00592735	AKT1/AKT2	2
R-HSA-209543	p75NTR recruits signalling complexes	2/65	13/10955	0.00259231	0.0105409	0.00592735	PRKCI/IKBKB	2
R-HSA-933543	NF-kB activation through FADD/RIP-1 pathway mediated by caspase-8 and -10	2/65	13/10955	0.00259231	0.0105409	0.00592735	CHUK/IKBKB	2
R-HSA-69242	S Phase	5/65	163/10955	0.00275952	0.011147	0.00626816	AKT1/AKT2/CDK4/CDK2/CDK7	5
R-HSA-169893	Prolonged ERK activation events	2/65	14/10955	0.00301282	0.0116344	0.00654223	MAPK1/BRAF	2
R-HSA-442720	CREB1 phosphorylation through the activation of Adenylate Cyclase	2/65	14/10955	0.00301282	0.0116344	0.00654223	PRKACA/PRKX	2
R-HSA-6804759	Regulation of TP53 Activity through Association with Co-factors	2/65	14/10955	0.00301282	0.0116344	0.00654223	AKT1/AKT2	2
R-HSA-9005891	Loss of function of MECP2 in Rett syndrome	2/65	14/10955	0.00301282	0.0116344	0.00654223	PRKACA/CAMK4	2
R-HSA-9005895	Pervasive developmental disorders	2/65	14/10955	0.00301282	0.0116344	0.00654223	PRKACA/CAMK4	2
R-HSA-9675151	Disorders of Developmental Biology	2/65	14/10955	0.00301282	0.0116344	0.00654223	PRKACA/CAMK4	2
R-HSA-9697154	Disorders of Nervous System Development	2/65	14/10955	0.00301282	0.0116344	0.00654223	PRKACA/CAMK4	2
R-HSA-111447	Activation of BAD and translocation to mitochondria	2/65	15/10955	0.00346307	0.0129654	0.00729066	AKT1/AKT2	2
R-HSA-4419969	Depolymerization of the Nuclear Lamina	2/65	15/10955	0.00346307	0.0129654	0.00729066	PRKCA/PRKCB	2
R-HSA-918233	TRAF3-dependent IRF activation pathway	2/65	15/10955	0.00346307	0.0129654	0.00729066	IKBKE/TBK1	2
R-HSA-937039	IRAK1 recruits IKK complex	2/65	15/10955	0.00346307	0.0129654	0.00729066	CHUK/IKBKB	2
R-HSA-975144	IRAK1 recruits IKK complex upon TLR7/8 or 9 stimulation	2/65	15/10955	0.00346307	0.0129654	0.00729066	CHUK/IKBKB	2
R-HSA-75153	Apoptotic execution phase	3/65	52/10955	0.00358126	0.0133266	0.0074938	PRKCD/PRKCQ/ROCK1	3
R-HSA-9755511	KEAP1-NFE2L2 pathway	4/65	107/10955	0.00368761	0.0136397	0.00766986	PRKCD/AKT1/CSNK2A1/AKT2	4
R-HSA-1295596	Spry regulation of FGF signaling	2/65	16/10955	0.00394269	0.0142282	0.00800077	MAPK1/BRAF	2
R-HSA-193639	p75NTR signals via NF-kB	2/65	16/10955	0.00394269	0.0142282	0.00800077	PRKCI/IKBKB	2
R-HSA-418457	cGMP effects	2/65	16/10955	0.00394269	0.0142282	0.00800077	PRKG2/PRKG1	2
R-HSA-5684264	MAP3K8 (TPL2)-dependent MAPK1/3 activation	2/65	16/10955	0.00394269	0.0142282	0.00800077	CHUK/IKBKB	2
R-HSA-8848021	Signaling by PTK6	3/65	54/10955	0.00398575	0.0142282	0.00800077	AKT1/CDK4/CDK2	3
R-HSA-9006927	Signaling by Non-Receptor Tyrosine Kinases	3/65	54/10955	0.00398575	0.0142282	0.00800077	AKT1/CDK4/CDK2	3
R-HSA-1810476	RIP-mediated NFkB activation via ZBP1	2/65	17/10955	0.00445135	0.0156179	0.00878222	CHUK/IKBKB	2
R-HSA-450385	Butyrate Response Factor 1 (BRF1) binds and destabilizes mRNA	2/65	17/10955	0.00445135	0.0156179	0.00878222	AKT1/MAPKAPK2	2
R-HSA-450604	KSRP (KHSRP) binds and destabilizes mRNA	2/65	17/10955	0.00445135	0.0156179	0.00878222	AKT1/MAPK11	2
R-HSA-936964	Activation of IRF3, IRF7 mediated by TBK1, IKBKE	2/65	18/10955	0.00498869	0.0173054	0.00973113	IKBKE/TBK1	2
R-HSA-9758274	Regulation of NF-kappa B signaling	2/65	18/10955	0.00498869	0.0173054	0.00973113	CHUK/IKBKB	2
R-HSA-202403	TCR signaling	4/65	120/10955	0.00554313	0.0191207	0.0107519	PRKCQ/PAK1/CHUK/IKBKB	4
R-HSA-8878166	Transcriptional regulation by RUNX2	4/65	121/10955	0.00570747	0.0195776	0.0110088	AKT1/AKT2/CDK4/MAPK1	4
R-HSA-4086398	Ca2+ pathway	3/65	62/10955	0.00587632	0.0198245	0.0111477	PRKG2/PRKG1/PRKCA	3
R-HSA-6796648	TP53 Regulates Transcription of DNA Repair Genes	3/65	62/10955	0.00587632	0.0198245	0.0111477	CDK9/ATR/CDK7	3
R-HSA-8986944	Transcriptional Regulation by MECP2	3/65	62/10955	0.00587632	0.0198245	0.0111477	PRKACA/CAMK4/AURKB	3
R-HSA-69275	G2/M Transition	5/65	196/10955	0.00603843	0.0202601	0.0113926	PRKACA/AURKA/CSNK1E/CDK2/CDK7	5
R-HSA-168927	TICAM1, RIP1-mediated IKK complex recruitment	2/65	20/10955	0.00614801	0.0204938	0.011524	CHUK/IKBKB	2
R-HSA-5673001	RAF/MAP kinase cascade	6/65	280/10955	0.00617483	0.0204938	0.011524	PRKG2/PRKCQ/MAPK1/RAF1/BRAF/ARAF	6
R-HSA-453274	Mitotic G2-G2/M phases	5/65	198/10955	0.00629904	0.0207936	0.0116926	PRKACA/AURKA/CSNK1E/CDK2/CDK7	5
R-HSA-1834949	Cytosolic sensors of pathogen-associated DNA	3/65	64/10955	0.00641945	0.0210778	0.0118524	CHUK/IKBKB/TBK1	3
R-HSA-9705671	SARS-CoV-2 activates/modulates innate and adaptive immune responses	4/65	126/10955	0.00657812	0.0214839	0.0120808	IKBKE/CHUK/IKBKB/TBK1	4
R-HSA-210745	Regulation of gene expression in beta cells	2/65	21/10955	0.00676931	0.0216477	0.0121729	AKT1/AKT2	2
R-HSA-389513	CTLA4 inhibitory signaling	2/65	21/10955	0.00676931	0.0216477	0.0121729	AKT1/AKT2	2
R-HSA-416572	Sema4D induced cell migration and growth-cone collapse	2/65	21/10955	0.00676931	0.0216477	0.0121729	ROCK2/ROCK1	2
R-HSA-8978934	Metabolism of cofactors	2/65	21/10955	0.00676931	0.0216477	0.0121729	PRKG2/AKT1	2
R-HSA-5684996	MAPK1/MAPK3 signaling	6/65	286/10955	0.00682996	0.0217285	0.0122183	PRKG2/PRKCQ/MAPK1/RAF1/BRAF/ARAF	6
R-HSA-1169091	Activation of NF-kappaB in B cells	3/65	67/10955	0.00728871	0.0230684	0.0129718	PRKCB/CHUK/IKBKB	3
R-HSA-111931	PKA-mediated phosphorylation of CREB	2/65	22/10955	0.00741791	0.0231198	0.0130007	PRKACA/PRKX	2
R-HSA-392154	Nitric oxide stimulates guanylate cyclase	2/65	22/10955	0.00741791	0.0231198	0.0130007	PRKG2/PRKG1	2
R-HSA-9768919	NPAS4 regulates expression of target genes	2/65	22/10955	0.00741791	0.0231198	0.0130007	CDK5/MAPK1	2
R-HSA-3371453	Regulation of HSF1-mediated heat shock response	3/65	69/10955	0.00790513	0.0243907	0.0137153	MAPKAPK2/MAPK1/ATR	3
R-HSA-8948751	Regulation of PTEN stability and activity	3/65	69/10955	0.00790513	0.0243907	0.0137153	AKT1/CSNK2A1/AKT2	3
R-HSA-9013422	RHOBTB1 GTPase cycle	2/65	23/10955	0.00809349	0.024847	0.0139719	ROCK2/ROCK1	2
R-HSA-166208	mTORC1-mediated signalling	2/65	24/10955	0.0087957	0.0268685	0.0151086	RPS6KB1/MTOR	2
R-HSA-8854518	AURKA Activation by TPX2	3/65	73/10955	0.00922806	0.0279802	0.0157338	PRKACA/AURKA/CSNK1E	3
R-HSA-2029485	Role of phospholipids in phagocytosis	2/65	25/10955	0.00952422	0.0279802	0.0157338	PRKCD/PRKCE	2
R-HSA-392451	G beta:gamma signalling through PI3Kgamma	2/65	25/10955	0.00952422	0.0279802	0.0157338	AKT1/AKT2	2
R-HSA-400685	Sema4D in semaphorin signaling	2/65	25/10955	0.00952422	0.0279802	0.0157338	ROCK2/ROCK1	2
R-HSA-5357786	TNFR1-induced proapoptotic signaling	2/65	25/10955	0.00952422	0.0279802	0.0157338	IKBKE/TBK1	2
R-HSA-69273	Cyclin A/B1/B2 associated events during G2/M transition	2/65	25/10955	0.00952422	0.0279802	0.0157338	CDK2/CDK7	2
R-HSA-933542	TRAF6 mediated NF-kB activation	2/65	25/10955	0.00952422	0.0279802	0.0157338	CHUK/IKBKB	2
R-HSA-937041	IKK complex recruitment mediated by RIP1	2/65	25/10955	0.00952422	0.0279802	0.0157338	CHUK/IKBKB	2
R-HSA-8939211	ESR-mediated signaling	5/65	222/10955	0.0100718	0.0294481	0.0165592	AKT1/PRKCZ/AKT2/CDK9/MAPK1	5
R-HSA-180024	DARPP-32 events	2/65	26/10955	0.0102787	0.0299106	0.0168193	PRKACA/CDK5	2
R-HSA-5357769	Caspase activation via extrinsic apoptotic signalling pathway	2/65	27/10955	0.0110589	0.0318786	0.0179259	DAPK2/DAPK3	2
R-HSA-9648002	RAS processing	2/65	27/10955	0.0110589	0.0318786	0.0179259	PRKG2/PRKCQ	2
R-HSA-68886	M Phase	7/65	417/10955	0.0114489	0.0328488	0.0184715	PRKACA/PRKCA/PRKCB/CSNK2A1/CSNK1E/AURKB/MAPK1	7
R-HSA-201681	TCF dependent signaling in response to WNT	5/65	232/10955	0.0120249	0.0343408	0.0193104	AKT1/CSNK2A1/CSNK1E/AKT2/CSNK1A1	5
R-HSA-2871837	FCERI mediated NF-kB activation	3/65	82/10955	0.0126541	0.035592	0.020014	PRKCQ/CHUK/IKBKB	3
R-HSA-380972	Energy dependent regulation of mTOR by LKB1-AMPK	2/65	29/10955	0.0126949	0.035592	0.020014	MTOR/PRKAA1	2
R-HSA-5654732	Negative regulation of FGFR3 signaling	2/65	29/10955	0.0126949	0.035592	0.020014	MAPK1/BRAF	2
R-HSA-8863795	Downregulation of ERBB2 signaling	2/65	29/10955	0.0126949	0.035592	0.020014	AKT1/AKT2	2
R-HSA-446652	Interleukin-1 family signaling	4/65	153/10955	0.0128124	0.0357582	0.0201075	CHUK/IKBKB/TBK1/MAPK8	4
R-HSA-1168372	Downstream signaling events of B Cell Receptor (BCR)	3/65	83/10955	0.0130739	0.0362098	0.0203614	PRKCB/CHUK/IKBKB	3
R-HSA-8878171	Transcriptional regulation by RUNX1	5/65	237/10955	0.0130921	0.0362098	0.0203614	PRKCQ/PRKCB/CSNK2A1/CDK6/CDK7	5
R-HSA-3928663	EPHA-mediated growth cone collapse	2/65	30/10955	0.0135501	0.0369767	0.0207927	ROCK2/ROCK1	2
R-HSA-6804758	Regulation of TP53 Activity through Acetylation	2/65	30/10955	0.0135501	0.0369767	0.0207927	AKT1/AKT2	2
R-HSA-933541	TRAF6 mediated IRF7 activation	2/65	30/10955	0.0135501	0.0369767	0.0207927	IKBKE/TBK1	2
R-HSA-5260271	Diseases of Immune System	2/65	31/10955	0.0144297	0.0388589	0.0218511	CHUK/IKBKB	2
R-HSA-5602358	Diseases associated with the TLR signaling cascade	2/65	31/10955	0.0144297	0.0388589	0.0218511	CHUK/IKBKB	2
R-HSA-5654733	Negative regulation of FGFR4 signaling	2/65	31/10955	0.0144297	0.0388589	0.0218511	MAPK1/BRAF	2
R-HSA-174143	APC/C-mediated degradation of cell cycle proteins	3/65	88/10955	0.0152919	0.040646	0.022856	AURKA/AURKB/CDK2	3
R-HSA-2565942	Regulation of PLK1 Activity at G2/M Transition	3/65	88/10955	0.0152919	0.040646	0.022856	PRKACA/AURKA/CSNK1E	3
R-HSA-453276	Regulation of mitotic cell cycle	3/65	88/10955	0.0152919	0.040646	0.022856	AURKA/AURKB/CDK2	3
R-HSA-9658195	Leishmania infection	4/65	164/10955	0.0161618	0.0424857	0.0238905	PRKACA/PRKX/MAPK1/MAPK8	4
R-HSA-9824443	Parasitic Infection Pathways	4/65	164/10955	0.0161618	0.0424857	0.0238905	PRKACA/PRKX/MAPK1/MAPK8	4
R-HSA-5357956	TNFR1-induced NF-kappa-B signaling pathway	2/65	33/10955	0.0162608	0.0424857	0.0238905	CHUK/IKBKB	2
R-HSA-5654726	Negative regulation of FGFR1 signaling	2/65	33/10955	0.0162608	0.0424857	0.0238905	MAPK1/BRAF	2
R-HSA-2682334	EPH-Ephrin signaling	3/65	92/10955	0.0172102	0.0442176	0.0248643	ROCK2/PAK1/ROCK1	3
R-HSA-4086400	PCP/CE pathway	3/65	92/10955	0.0172102	0.0442176	0.0248643	PRKCA/PRKCG/PRKCB	3
R-HSA-5654727	Negative regulation of FGFR2 signaling	2/65	34/10955	0.0172117	0.0442176	0.0248643	MAPK1/BRAF	2
R-HSA-9634815	Transcriptional Regulation by NPAS4	2/65	34/10955	0.0172117	0.0442176	0.0248643	CDK5/MAPK1	2
R-HSA-5693532	DNA Double-Strand Break Repair	4/65	168/10955	0.0175042	0.0447815	0.0251814	CHEK2/CDK2/ATR/MAPK8	4
R-HSA-170834	Signaling by TGF-beta Receptor Complex	3/65	93/10955	0.0177099	0.0451199	0.0253717	PRKCZ/CDK9/MAPK1	3
R-HSA-936440	Negative regulators of DDX58/IFIH1 signaling	2/65	35/10955	0.0181858	0.045951	0.0258391	IKBKE/TBK1	2
R-HSA-9706574	RHOBTB GTPase Cycle	2/65	35/10955	0.0181858	0.045951	0.0258391	ROCK2/ROCK1	2
R-HSA-2173796	SMAD2/SMAD3:SMAD4 heterotrimer regulates transcription	2/65	36/10955	0.0191828	0.0482714	0.0271438	CDK9/MAPK1	2
R-HSA-193704	p75 NTR receptor-mediated signalling	3/65	97/10955	0.0197895	0.0495948	0.0278881	PRKCI/IKBKB/MAPK8	3
