# Supplementary material for: MicroRNA-26b protects against MASH development in mice and can be efficiently targeted with lipid nanoparticles
Source: eLife. 2025 Apr 22;13:RP97165. doi: 10.7554/eLife.97165 (PMC12014130; doi:10.7554/eLife.97165)
Supplement: Figure 8—source data 1. [file elife-97165-fig8-data1.xlsx]

## Sheet: Figure 8B
	eLNP	mLNP
	1.04474	0.96392
	0.955263	0.943973
	1.0593	1.17606
	0.940703	1.06595
	1.01098	1.07959
	0.98902	1.06738

## Sheet: Figure 8C
	eLNP	mLNP
	1.0502	0.180591
	0.949799	0.169103
	0.99632	0.563937
	1.00368	0.416743
	1.00074	0.293027
	0.999258	0.195104

## Sheet: Figure 8D
	eLNP	mLNP
	1	0.738042
		0.752362
	1.02732	0.583893
	0.972678	0.632606
	0.98759	0.575258
	1.01241	0.631384

## Sheet: Figure 8E
	eLNP	mLNP
	0.98258	0.593318
	1.01742	0.620859
	1.0267	0.866477
	0.973295	1.0233
	1.09683	0.357143
	0.903174	0.595238

## Sheet: Figure 8G
	Healthy	Cirrhosis
	1.04429	3.34165
	0.74356	6.64174
	0.860664	2.68619
	1.27326	3.22558
	0.944433	3.27061
	1.1547	3.36956
	0.979095	3.9492
	0.156543
	1.87987
	1.35157
	0.612014

## Sheet: Figure 8H
	Healthy	Cirrhosis
	1.02191	5.33309
	0.524956	9.84896
	1.08543	6.07117
	1.33262	5.26696
	0.967457	3.9476
	1.17305	5.01752
	0.894572	7.73807
	0.182402	5.16215
	1.03828
	0.844512
	1.93481
